# Supplementary material for: Gluconeogenesis using glycerol as a substrate in bloodstream-form Trypanosoma brucei
Source: PubMed Central journal article supplement (PMC6307712; doi:10.1371/journal.ppat.1007475), 2018-12-27
Supplement: ppat.1007475.s001.pdf [file ppat.1007475.s001.pdf]

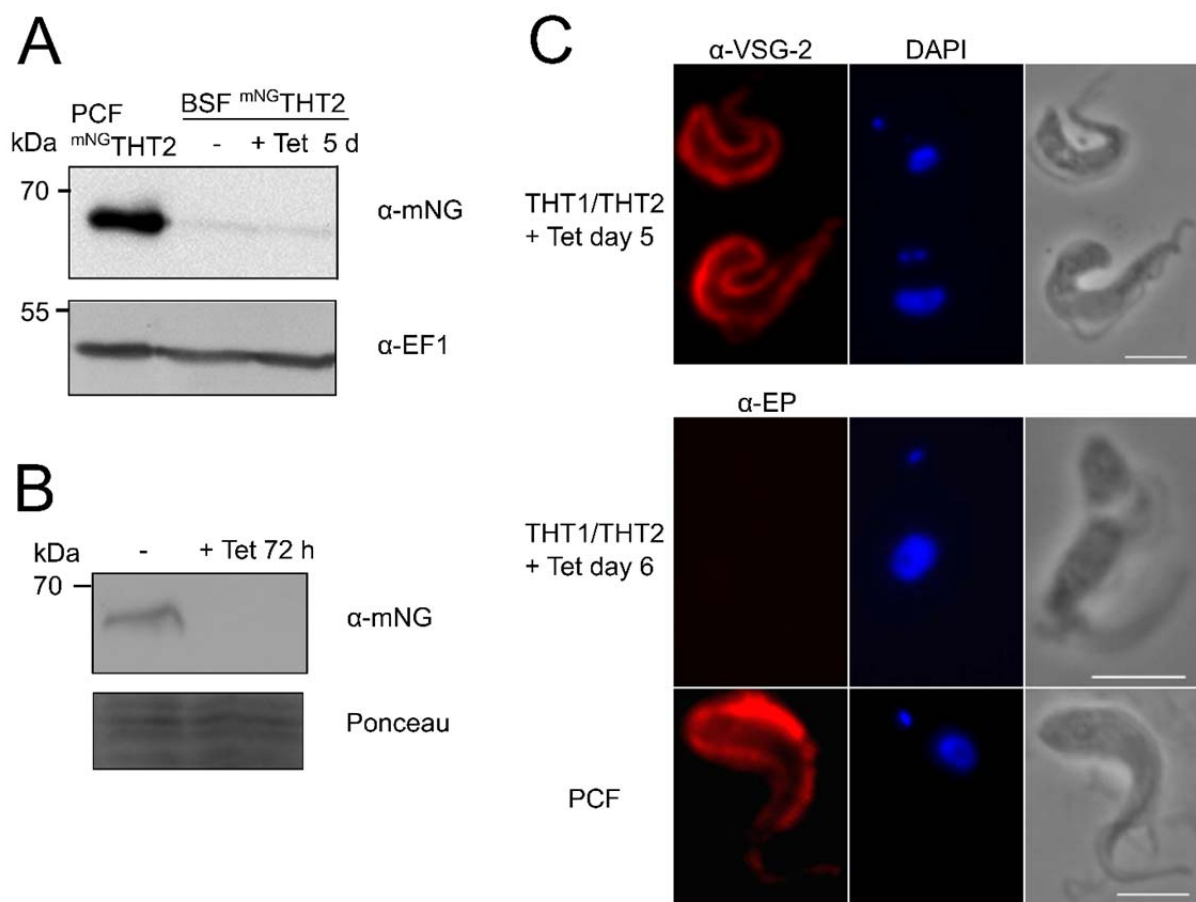

**S1 Fig. THT knockdown in bloodstream and insect stage cells.** (A) The protein blot shows native tagged  $mNG^{THT2}$  in bloodstream form cells following THT1 knockdown for 5 days. (B) The protein blot shows depletion of native tagged  $mNG^{THT2}$  following THT1/THT2 knockdown in insect stage cells; see Fig 2C for depletion of  $mNG^{THT1}$  by the same approach in bloodstream form cells. (C) Bloodstream form THT1/THT2 knockdown cells were grown in the presence of tetracycline and glycerol for up to 6 days, and scrutinised by immunofluorescence microscopy. Staining of the cell surface with  $\alpha$ -VSG-2, but not  $\alpha$ -EP procyclin antibody validated that these cells are not differentiated into PCF. A PCF cell is shown as a control. DNA was counter stained with DAPI; scale bars 5  $\mu$ m.
