# Supplementary material for: Gluconeogenesis using glycerol as a substrate in bloodstream-form Trypanosoma brucei
Source: PubMed Central journal article supplement (PMC6307712; doi:10.1371/journal.ppat.1007475), 2018-12-27
Supplement: ppat.1007475.s002.pdf [file ppat.1007475.s002.pdf]

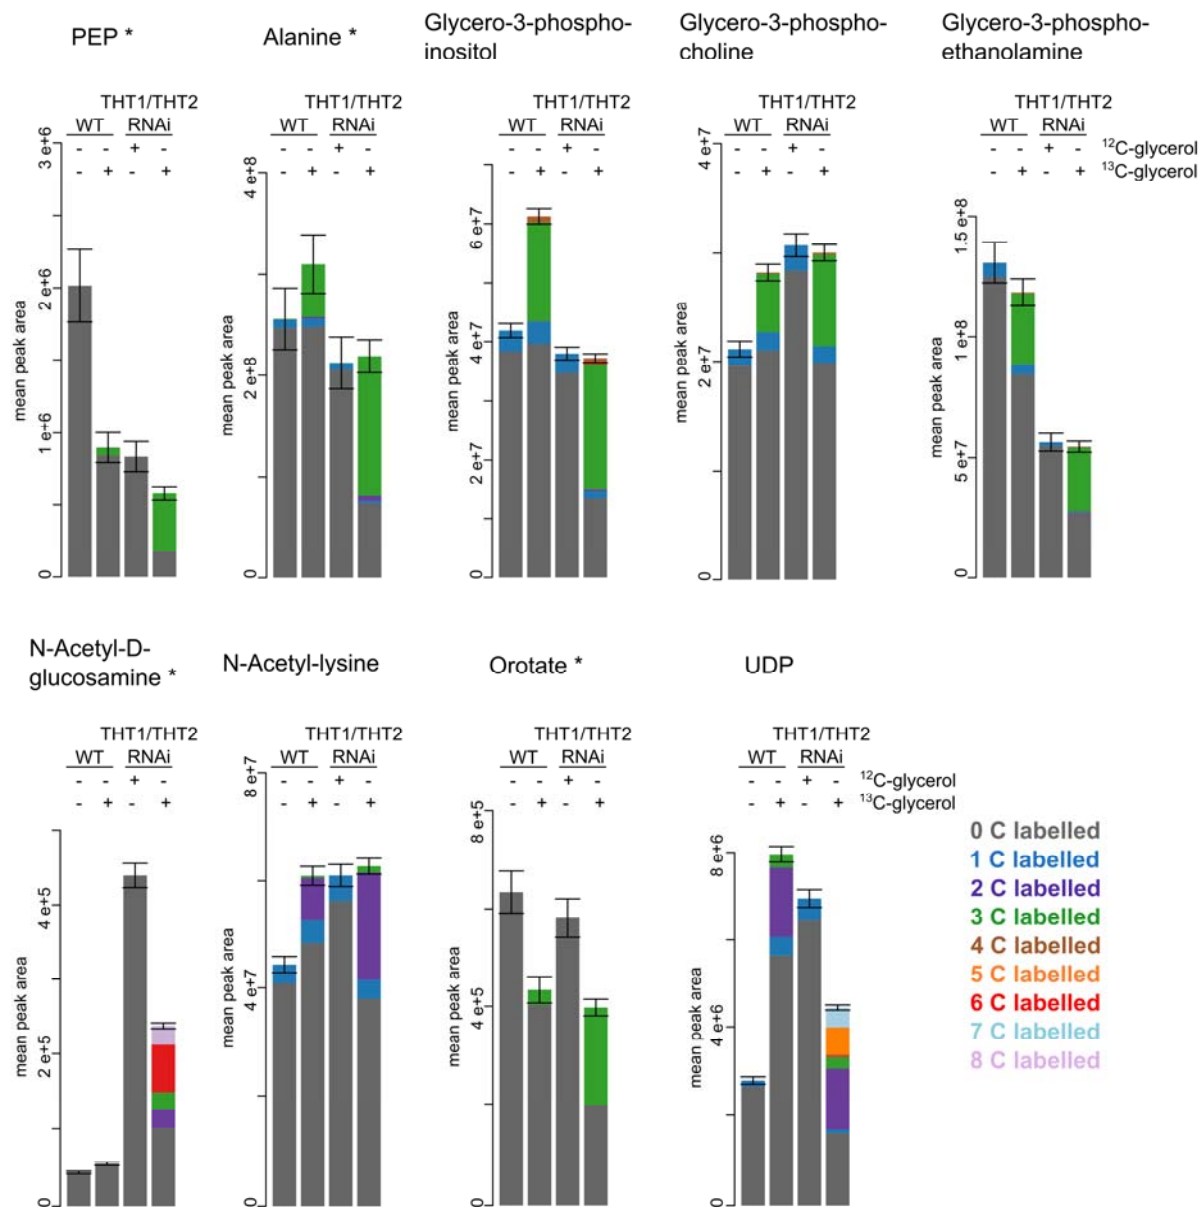

**S2 Fig. Additional metabolites detected by the LC-MS analysis.** The size of the bars represents the total abundance, and coloured parts indicate <sup>13</sup>C labelling as depicted in the legend. The samples are from WT cells, WT grown in <sup>13</sup>C-glycerol, THT1/THT2 RNAi grown in <sup>12</sup>C-glycerol and THT1/THT2 RNAi grown in <sup>13</sup>C-glycerol. Natural abundance of <sup>13</sup>C is 1 %, hence the labelling in ‘un-labelled’ samples.  
\* the identity of these metabolites was confirmed using a match with a standard.
