# Supplementary material for: Gluconeogenesis using glycerol as a substrate in bloodstream-form Trypanosoma brucei
Source: PLoS Pathog. 2018 Dec 27;14(12):e1007475. doi: 10.1371/journal.ppat.1007475 (PMC6307712; doi:10.1371/journal.ppat.1007475)
Supplement: S1 Table — The samples are from WT cells, WT grown in 13C-glycerol, THT1/THT2 RNAi grown in 12C-glycerol and THT1/THT2 RNAi grown in 13C-glycerol, n = 4. (XLSX) [file ppat.1007475.s004.xlsx]

## Sheet: Sheet1
	samples
	WT: JK01, JK02, JK09, JK10
	WT + 13C glycerol: JK03, JK04, JK11, JK12
	THT1/THT2 + 12C glycerol: JK05, JK06, JK13, JK14
	THT1/THT2 + 13C glycerol: JK07, JK08, JK15, JK16
Metabolite: (1-RIBOSYLIMIDAZOLE)-4-ACETATE	Formula: C10H14N2O6	Mass: 258.0852
-----------------------------------------------------------------------------
Group: 1
(1-Ribosylimidazole)-4-acetate C10H14N2O6	blank1r	blank2r	blank3r	blank4	blank5	blank6	pooled_1	pooled_10	pooled_11	pooled_2	pooled_3	pooled_4	pooled_5	pooled_6	pooled_7	pooled_8	pooled_9	JK05	JK06	JK13	JK14	JK07	JK08	JK15	JK16	JK01	JK02	JK09	JK10	JK03	JK04	JK11	JK12
(1-Ribosylimidazole)-4-acetate 0	0	0	0	0	0	0	267899	254150	191238	228612	285115	244915	260427	236532	309790	267946	335747	1.52959e+06	1.60779e+06	2.10899e+06	1.30431e+06	1.36281e+06	1.50695e+06	1.6574e+06	1.64746e+06	1.02765e+06	1.10681e+06	1.63585e+06	2.20742e+06	2.19045e+06	2.23978e+06	2.77586e+06	2.36755e+06
(1-Ribosylimidazole)-4-acetate 1	0	0	0	0	0	0	0	0	0	0	0	0	0	0	0	0	0	0	0	0	0	0	0	0	0	0	0	87680.9	0	70098	0	88620.3	98996.8
(1-Ribosylimidazole)-4-acetate 2	0	0	0	0	0	0	0	0	0	0	0	0	0	0	0	0	0	0	0	0	0	0	0	0	0	0	0	0	0	0	0	0	0
(1-Ribosylimidazole)-4-acetate 3	0	0	0	0	0	0	0	0	0	0	0	0	0	0	0	0	0	0	0	0	0	0	0	0	0	0	0	0	0	0	0	0	0
(1-Ribosylimidazole)-4-acetate 4	0	0	0	0	0	0	0	0	0	0	0	0	0	0	0	0	0	0	0	0	0	0	0	0	0	0	0	0	0	0	0	0	0
(1-Ribosylimidazole)-4-acetate 5	0	0	0	0	0	0	0	0	0	0	0	0	0	0	0	0	0	0	0	0	0	0	0	0	0	0	0	0	0	0	0	0	0
(1-Ribosylimidazole)-4-acetate 6	0	0	0	0	0	0	0	0	0	0	0	0	0	0	0	0	0	0	0	0	0	0	0	0	0	0	0	0	0	0	0	0	0
(1-Ribosylimidazole)-4-acetate 7	0	0	0	0	0	0	0	0	0	0	0	0	0	0	0	0	0	0	0	0	0	0	0	0	0	0	0	0	0	0	0	0	0
(1-Ribosylimidazole)-4-acetate 8	0	0	0	0	0	0	0	0	0	0	0	0	0	0	0	0	0	0	0	0	0	0	0	0	0	0	0	0	0	0	0	0	0
(1-Ribosylimidazole)-4-acetate 9	0	0	0	0	0	0	0	0	0	0	0	0	0	0	0	0	0	0	0	0	0	0	0	0	0	0	0	0	0	0	0	0	0
(1-Ribosylimidazole)-4-acetate 10	0	0	0	0	0	0	0	0	0	0	0	0	0	0	0	0	0	0	0	0	0	0	0	0	0	0	0	0	0	0	0	0	0
Group: 2
(1-Ribosylimidazole)-4-acetate C10H14N2O6	blank1r	blank2r	blank3r	blank4	blank5	blank6	pooled_1	pooled_10	pooled_11	pooled_2	pooled_3	pooled_4	pooled_5	pooled_6	pooled_7	pooled_8	pooled_9	JK05	JK06	JK13	JK14	JK07	JK08	JK15	JK16	JK01	JK02	JK09	JK10	JK03	JK04	JK11	JK12
(1-Ribosylimidazole)-4-acetate 0	0	0	0	0	0	0	36326.6	41688.8	51780.7	0	30626.4	0	47182.7	43371.7	79132.6	47013.6	0	104991	62741.5	175165	113405	0	0	30785.6	54960.7	398698	502108	1.05792e+06	819378	425243	525243	615191	649730
(1-Ribosylimidazole)-4-acetate 1	0	0	0	0	0	0	0	0	0	0	0	0	0	0	0	0	0	0	0	0	0	0	0	0	0	0	0	30471.1	24261.8	18653.7	0	0	0
(1-Ribosylimidazole)-4-acetate 2	0	0	0	0	0	0	0	0	0	0	0	0	0	0	0	0	0	0	0	0	0	0	0	0	0	0	0	0	0	42630.3	48683.9	72702.2	81131.7
(1-Ribosylimidazole)-4-acetate 3	0	0	0	0	0	0	0	0	0	0	0	0	0	0	0	0	0	0	0	0	0	0	0	0	0	0	0	0	0	0	0	0	0
(1-Ribosylimidazole)-4-acetate 4	0	0	0	0	0	0	0	0	0	0	0	0	0	0	0	0	0	0	0	0	0	0	0	0	0	0	0	0	0	0	0	0	0
(1-Ribosylimidazole)-4-acetate 5	0	0	0	0	0	0	0	0	0	0	0	0	0	0	0	0	0	0	0	0	0	0	0	0	0	0	0	0	0	0	0	0	0
(1-Ribosylimidazole)-4-acetate 6	0	0	0	0	0	0	0	0	0	0	0	0	0	0	261880	0	0	0	0	0	0	0	0	0	0	0	0	0	0	0	0	0	0
(1-Ribosylimidazole)-4-acetate 7	0	0	0	0	0	0	0	0	0	0	0	0	0	0	0	0	0	0	0	0	0	0	0	0	0	0	0	0	0	0	0	0	0
(1-Ribosylimidazole)-4-acetate 8	0	0	0	0	0	0	0	0	0	0	0	0	0	0	0	0	0	0	0	0	0	0	0	0	0	0	0	0	0	0	0	0	0
(1-Ribosylimidazole)-4-acetate 9	0	0	0	0	0	0	0	0	0	0	0	0	0	0	0	0	0	0	0	0	0	0	0	0	0	0	0	0	0	0	0	0	0
(1-Ribosylimidazole)-4-acetate 10	0	0	0	0	0	0	0	0	0	0	0	0	0	0	0	0	0	0	0	0	0	0	0	0	0	0	0	0	0	0	0	0	0
Metabolite: (R)-MALATE	Formula: C4H6O5	Mass: 134.0215
-----------------------------------------------------------------------------
Group: 1
(R)-Malate C4H6O5	blank1r	blank2r	blank3r	blank4	blank5	blank6	pooled_1	pooled_10	pooled_11	pooled_2	pooled_3	pooled_4	pooled_5	pooled_6	pooled_7	pooled_8	pooled_9	JK05	JK06	JK13	JK14	JK07	JK08	JK15	JK16	JK01	JK02	JK09	JK10	JK03	JK04	JK11	JK12
(R)-Malate 0	5.42452e+06	1.9148e+06	1.17073e+06	1.60817e+06	779792	1.14334e+06	1.23486e+08	4.66057e+07	6.60156e+07	8.55396e+07	8.76057e+07	8.67069e+07	8.67108e+07	8.63409e+07	9.3478e+07	5.23497e+07	5.78685e+07	2.5609e+08	4.73617e+08	6.3791e+08	4.09179e+08	1.60095e+08	2.85566e+08	1.95352e+08	1.8693e+08	1.75666e+08	1.16391e+08	1.749e+08	2.84522e+08	2.55215e+08	3.17977e+08	2.70132e+08	3.17306e+08
(R)-Malate 1	0	0	0	0	0	0	6.16597e+06	2.10976e+06	3.18816e+06	4.09151e+06	4.22493e+06	4.22249e+06	4.20325e+06	4.33187e+06	4.47757e+06	2.46185e+06	2.68892e+06	1.05974e+07	2.05998e+07	2.7798e+07	1.79241e+07	1.13347e+07	1.97e+07	1.46892e+07	1.30631e+07	7.41557e+06	4.79415e+06	7.23347e+06	1.22891e+07	1.2982e+07	1.63057e+07	1.46084e+07	1.6688e+07
(R)-Malate 2	0	0	0	0	0	0	4.57106e+06	1.47647e+06	2.25831e+06	2.94546e+06	3.13935e+06	3.12509e+06	3.22639e+06	3.1151e+06	3.28536e+06	1.93743e+06	2.04975e+06	84665.6	312982	489233	204778	2.33947e+07	4.10483e+07	4.97954e+07	3.46353e+07	0	0	0	139844	6.48925e+06	8.60692e+06	1.19653e+07	1.57156e+07
(R)-Malate 3	0	0	0	0	0	0	1.95201e+07	7.36727e+06	1.02752e+07	1.30437e+07	1.37355e+07	1.3221e+07	1.39233e+07	1.35237e+07	1.4473e+07	8.37926e+06	8.97012e+06	0	0	0	0	1.07006e+08	1.8844e+08	2.07205e+08	1.55243e+08	0	0	0	0	2.51648e+07	3.15878e+07	3.5241e+07	4.56479e+07
(R)-Malate 4	252963	0	0	0	0	0	879004	284125	393026	586094	668319	587012	695506	606946	739292	367978	349559	0	0	0	0	5.96462e+06	1.02046e+07	1.00731e+07	8.1153e+06	0	0	0	0	322721	612998	643483	804660
Metabolite: (S)-1-PYRROLINE-5-CARBOXYLATE	Formula: C5H7NO2	Mass: 113.0477
-----------------------------------------------------------------------------
Group: 1
(S)-1-Pyrroline-5-carboxylate C5H7NO2	blank1r	blank2r	blank3r	blank4	blank5	blank6	pooled_1	pooled_10	pooled_11	pooled_2	pooled_3	pooled_4	pooled_5	pooled_6	pooled_7	pooled_8	pooled_9	JK05	JK06	JK13	JK14	JK07	JK08	JK15	JK16	JK01	JK02	JK09	JK10	JK03	JK04	JK11	JK12
(S)-1-Pyrroline-5-carboxylate 0	2.43139e+06	1.74378e+06	1.47392e+06	2.98665e+06	2.88008e+06	2.90385e+06	3.75322e+07	2.46972e+07	2.67808e+07	3.36535e+07	3.36624e+07	3.3628e+07	3.47348e+07	3.40509e+07	3.17661e+07	2.49777e+07	2.75422e+07	1.04361e+08	2.58242e+08	2.48594e+08	7.58624e+07	1.00604e+08	1.13879e+08	1.78498e+08	1.10939e+08	1.28998e+08	6.4332e+07	5.7553e+07	8.28509e+07	6.96319e+07	1.07092e+08	8.03735e+07	7.37346e+07
(S)-1-Pyrroline-5-carboxylate 1	28424.2	0	0	51770.2	26189.8	0	1.99201e+06	1.28099e+06	1.35225e+06	1.6735e+06	1.77498e+06	1.57994e+06	1.76562e+06	1.80125e+06	1.61351e+06	1.24978e+06	1.34565e+06	5.89535e+06	1.39818e+07	1.32448e+07	3.84388e+06	5.20603e+06	6.1805e+06	9.56545e+06	6.13349e+06	6.92704e+06	3.47678e+06	2.97214e+06	4.26134e+06	3.32039e+06	5.61505e+06	4.05695e+06	3.59323e+06
(S)-1-Pyrroline-5-carboxylate 2	0	0	0	0	0	0	0	0	0	0	0	0	0	0	0	0	0	0	0	60969	0	419037	398850	573472	309916	0	0	0	0	69013.6	62739.3	83133.4	0
(S)-1-Pyrroline-5-carboxylate 3	0	0	0	0	0	0	1.23727e+06	720081	952233	1.11978e+06	1.17091e+06	1.2355e+06	1.19743e+06	1.21258e+06	1.1755e+06	721334	979949	0	0	0	0	1.31465e+07	1.75148e+07	1.96377e+07	1.42215e+07	0	0	0	0	5.50208e+06	8.32892e+06	6.4186e+06	6.04747e+06
(S)-1-Pyrroline-5-carboxylate 4	0	0	0	0	0	0	0	0	0	0	0	0	0	0	0	0	0	0	0	0	0	0	130957	95294.9	59150.3	0	0	0	0	0	57373.9	0	0
(S)-1-Pyrroline-5-carboxylate 5	0	0	0	0	0	0	0	0	0	0	0	0	0	0	0	0	0	0	0	0	0	0	0	0	0	0	0	0	0	0	0	0	0
Metabolite: (S)-3-METHYL-2-OXOPENTANOIC ACID	Formula: C6H10O3	Mass: 130.063
-----------------------------------------------------------------------------
Group: 1
(S)-3-Methyl-2-oxopentanoic acid C6H10O3	blank1r	blank2r	blank3r	blank4	blank5	blank6	pooled_1	pooled_10	pooled_11	pooled_2	pooled_3	pooled_4	pooled_5	pooled_6	pooled_7	pooled_8	pooled_9	JK05	JK06	JK13	JK14	JK07	JK08	JK15	JK16	JK01	JK02	JK09	JK10	JK03	JK04	JK11	JK12
(S)-3-Methyl-2-oxopentanoic acid 0	2.1993e+07	1.25307e+07	1.17542e+07	1.10764e+07	1.08717e+07	1.10491e+07	7.00653e+07	7.55494e+07	7.40996e+07	7.07878e+07	7.05172e+07	7.14548e+07	7.10697e+07	7.26902e+07	7.13738e+07	7.38225e+07	7.4931e+07	1.51963e+08	1.98684e+08	2.12653e+08	1.33121e+08	1.48213e+08	1.49723e+08	1.81837e+08	1.34743e+08	2.45134e+08	1.56309e+08	2.71374e+08	2.89864e+08	2.47469e+08	3.14303e+08	3.06192e+08	2.67955e+08
(S)-3-Methyl-2-oxopentanoic acid 1	376868	156636	137243	200460	178527	206847	3.20731e+06	3.6615e+06	4.05383e+06	3.7669e+06	3.56764e+06	3.45262e+06	3.4777e+06	3.76442e+06	3.49043e+06	3.72459e+06	3.59615e+06	8.66099e+06	1.21536e+07	1.30512e+07	7.75863e+06	8.35238e+06	8.75212e+06	1.09265e+07	7.76708e+06	1.5307e+07	9.5313e+06	1.71865e+07	1.8455e+07	1.5372e+07	1.99166e+07	1.96175e+07	1.61376e+07
(S)-3-Methyl-2-oxopentanoic acid 2	0	0	0	0	0	0	0	0	0	0	0	0	0	0	0	0	0	0	57321	0	0	64550.5	0	0	0	109334	0	144647	157371	125346	191073	166326	224220
(S)-3-Methyl-2-oxopentanoic acid 3	0	0	0	0	0	0	0	0	0	0	0	0	0	0	0	0	0	0	0	0	0	0	0	0	0	0	0	0	0	0	0	0	0
(S)-3-Methyl-2-oxopentanoic acid 4	0	0	0	0	0	0	0	0	0	0	0	0	0	0	0	0	0	0	0	0	0	0	0	0	0	0	0	0	0	0	0	0	0
(S)-3-Methyl-2-oxopentanoic acid 5	0	146606	171922	87148.9	155655	160162	0	0	0	0	0	0	0	0	75229.6	0	0	0	0	0	0	43183.1	0	0	0	0	0	0	0	0	0	0	0
(S)-3-Methyl-2-oxopentanoic acid 6	0	0	0	0	0	0	0	0	0	0	0	0	0	0	0	0	0	0	0	0	0	0	0	0	0	0	0	0	0	0	0	0	0
Metabolite: (S)-DIHYDROOROTATE	Formula: C5H6N2O4	Mass: 158.0328
-----------------------------------------------------------------------------
Group: 1
(S)-Dihydroorotate C5H6N2O4	blank1r	blank2r	blank3r	blank4	blank5	blank6	pooled_1	pooled_10	pooled_11	pooled_2	pooled_3	pooled_4	pooled_5	pooled_6	pooled_7	pooled_8	pooled_9	JK05	JK06	JK13	JK14	JK07	JK08	JK15	JK16	JK01	JK02	JK09	JK10	JK03	JK04	JK11	JK12
(S)-Dihydroorotate 0	0	0	0	0	0	0	1.08065e+06	981871	985498	984049	1.10152e+06	1.04615e+06	1.13342e+06	965831	1.00934e+06	1.01433e+06	1.11828e+06	7.17779e+06	7.4229e+06	0	0	5.83739e+06	6.79657e+06	0	0	7.1451e+06	7.69524e+06	0	0	6.6646e+06	6.66316e+06	0	0
(S)-Dihydroorotate 1	0	0	0	0	0	0	0	0	0	0	0	0	0	0	0	0	0	306090	336151	0	0	178156	219027	0	0	285369	289776	0	0	236675	205564	0	0
(S)-Dihydroorotate 2	0	0	0	0	0	0	0	0	0	0	0	0	0	0	0	0	0	0	0	0	0	0	0	0	0	0	0	0	0	0	0	0	0
(S)-Dihydroorotate 3	0	0	0	0	0	0	0	0	0	0	0	0	0	0	0	0	0	0	0	0	0	74985.4	88177.1	0	0	0	0	0	0	0	0	0	0
(S)-Dihydroorotate 4	0	0	0	0	0	0	0	0	0	0	0	0	0	0	0	0	0	0	0	0	0	0	0	0	0	0	0	0	0	0	0	0	0
(S)-Dihydroorotate 5	0	0	0	0	0	0	0	0	0	0	0	0	0	0	0	0	0	0	0	0	0	0	0	0	0	0	0	0	0	0	0	0	0
Metabolite: 1-AMINOCYCLOPROPANE-1-CARBOXYLATE	Formula: C4H7NO2	Mass: 101.0477
-----------------------------------------------------------------------------
Group: 1
1-Aminocyclopropane-1-carboxylate C4H7NO2	blank1r	blank2r	blank3r	blank4	blank5	blank6	pooled_1	pooled_10	pooled_11	pooled_2	pooled_3	pooled_4	pooled_5	pooled_6	pooled_7	pooled_8	pooled_9	JK05	JK06	JK13	JK14	JK07	JK08	JK15	JK16	JK01	JK02	JK09	JK10	JK03	JK04	JK11	JK12
1-Aminocyclopropane-1-carboxylate 0	453094	267942	283851	563848	426644	368211	596471	629418	568695	566470	585188	587019	494991	609479	770253	615250	551875	1.18189e+06	1.10994e+06	1.52016e+06	1.30009e+06	758211	832284	884811	798201	672758	679818	734181	741159	674882	780887	636345	650160
1-Aminocyclopropane-1-carboxylate 1	0	0	0	0	0	0	0	0	0	0	0	0	0	0	0	0	0	0	0	22117.1	0	0	0	0	0	0	0	0	0	0	0	0	0
1-Aminocyclopropane-1-carboxylate 2	0	0	0	0	0	0	0	0	0	0	0	0	0	0	0	0	0	0	0	0	0	206944	260675	295254	274008	0	0	0	0	0	0	0	0
1-Aminocyclopropane-1-carboxylate 3	0	0	0	0	0	0	0	0	0	0	0	0	0	0	0	0	0	0	0	0	0	0	0	0	0	0	0	0	0	0	0	0	0
1-Aminocyclopropane-1-carboxylate 4	0	0	0	0	0	0	0	0	0	0	0	0	0	0	0	0	0	0	0	0	0	0	26152.4	42179.7	41579.6	0	0	0	0	0	0	0	0
Group: 2
1-Aminocyclopropane-1-carboxylate C4H7NO2	blank1r	blank2r	blank3r	blank4	blank5	blank6	pooled_1	pooled_10	pooled_11	pooled_2	pooled_3	pooled_4	pooled_5	pooled_6	pooled_7	pooled_8	pooled_9	JK05	JK06	JK13	JK14	JK07	JK08	JK15	JK16	JK01	JK02	JK09	JK10	JK03	JK04	JK11	JK12
1-Aminocyclopropane-1-carboxylate 0	915952	490468	605338	891907	842851	826572	784276	849866	902991	897374	846224	765256	756782	787301	1.23751e+06	851608	1.00601e+06	1.94431e+06	1.51177e+06	1.81574e+06	1.75941e+06	1.16045e+06	1.32967e+06	1.25944e+06	1.09655e+06	963364	1.03245e+06	959002	1.01743e+06	956863	1.11649e+06	785645	899903
1-Aminocyclopropane-1-carboxylate 1	0	0	0	0	0	0	0	0	0	0	0	0	0	0	0	0	0	0	0	0	0	0	0	0	0	0	0	0	0	0	0	0	0
1-Aminocyclopropane-1-carboxylate 2	0	0	0	0	0	0	0	0	0	0	0	0	0	0	0	0	0	0	0	0	0	219940	277272	273996	284552	0	0	0	0	0	0	0	0
1-Aminocyclopropane-1-carboxylate 3	0	0	0	0	0	0	0	0	0	0	0	0	0	0	0	0	0	0	0	0	0	0	0	0	0	0	0	0	0	0	0	0	0
1-Aminocyclopropane-1-carboxylate 4	0	0	0	0	0	0	0	0	0	0	0	0	0	0	0	0	0	0	0	0	0	0	0	0	0	0	0	0	0	0	0	0	0
Metabolite: 1,4-BIS(2-ETHYLHEXYL) SULFOSUCCINATE	Formula: C20H38O7S	Mass: 422.2338
-----------------------------------------------------------------------------
Group: 1
1,4-Bis(2-ethylhexyl) sulfosuccinate C20H38O7S	blank1r	blank2r	blank3r	blank4	blank5	blank6	pooled_1	pooled_10	pooled_11	pooled_2	pooled_3	pooled_4	pooled_5	pooled_6	pooled_7	pooled_8	pooled_9	JK05	JK06	JK13	JK14	JK07	JK08	JK15	JK16	JK01	JK02	JK09	JK10	JK03	JK04	JK11	JK12
1,4-Bis(2-ethylhexyl) sulfosuccinate 0	0	0	0	0	0	0	1.43401e+06	1.40196e+06	1.49315e+06	1.3571e+06	1.26134e+06	1.27738e+06	1.28286e+06	1.22509e+06	1.5291e+06	1.36082e+06	1.25418e+06	3.76001e+06	3.92732e+06	3.53566e+06	3.19389e+06	2.74309e+06	2.89616e+06	4.26384e+06	3.38983e+06	1.1029e+07	9.93251e+06	3.9191e+06	3.92018e+06	7.80576e+06	4.59838e+06	3.62634e+06	3.37115e+06
1,4-Bis(2-ethylhexyl) sulfosuccinate 1	0	0	0	0	0	0	145059	130419	209380	169184	144948	159223	140281	141308	225419	182341	108693	746496	791806	548979	522847	353527	633425	843257	614404	2.99322e+06	2.18393e+06	859497	1.04727e+06	1.70757e+06	839884	655589	625734
1,4-Bis(2-ethylhexyl) sulfosuccinate 2	0	0	0	0	0	0	0	0	0	0	0	0	0	0	0	0	0	0	0	0	0	0	0	0	0	159094	109250	0	0	0	0	0	0
1,4-Bis(2-ethylhexyl) sulfosuccinate 3	0	0	0	0	0	0	0	0	0	0	0	0	0	0	0	0	0	0	0	0	0	0	0	0	0	0	0	0	0	0	0	0	0
1,4-Bis(2-ethylhexyl) sulfosuccinate 4	0	0	0	0	0	0	0	0	0	0	0	0	0	0	0	0	0	0	0	0	0	0	0	0	0	0	0	0	0	0	0	0	0
1,4-Bis(2-ethylhexyl) sulfosuccinate 5	0	0	0	0	0	0	0	0	0	0	0	0	0	0	0	0	0	0	0	0	0	0	0	0	0	0	0	0	0	0	0	0	0
1,4-Bis(2-ethylhexyl) sulfosuccinate 6	0	0	0	0	0	0	0	0	0	0	0	0	0	0	0	0	0	0	0	0	0	0	0	0	0	0	0	0	0	0	0	0	0
1,4-Bis(2-ethylhexyl) sulfosuccinate 7	0	0	0	0	0	0	0	0	0	0	0	0	0	0	0	0	0	0	0	0	0	0	0	0	0	0	0	0	0	0	0	0	0
1,4-Bis(2-ethylhexyl) sulfosuccinate 8	0	0	0	0	0	0	0	0	0	0	0	0	0	0	0	0	0	0	0	0	0	0	0	0	0	0	0	0	0	0	0	0	0
1,4-Bis(2-ethylhexyl) sulfosuccinate 9	0	0	0	0	0	0	0	0	0	0	0	0	0	0	0	0	0	0	0	0	0	0	0	0	0	0	0	0	0	0	0	0	0
1,4-Bis(2-ethylhexyl) sulfosuccinate 10	0	0	0	0	0	0	0	0	0	0	0	0	0	0	0	0	0	0	0	0	0	0	0	0	0	0	0	0	0	0	0	0	0
1,4-Bis(2-ethylhexyl) sulfosuccinate 11	0	0	0	0	0	0	0	0	0	0	0	0	0	0	0	0	0	0	0	0	0	0	0	0	0	0	0	0	0	0	0	0	0
1,4-Bis(2-ethylhexyl) sulfosuccinate 12	0	0	0	0	0	0	0	0	0	0	0	0	0	0	0	0	0	0	0	0	0	0	0	0	0	0	0	0	0	0	0	0	0
1,4-Bis(2-ethylhexyl) sulfosuccinate 13	0	0	0	0	0	0	0	0	0	0	0	0	0	0	0	0	0	0	0	0	0	0	0	0	0	0	0	0	0	0	0	0	0
1,4-Bis(2-ethylhexyl) sulfosuccinate 14	0	0	0	0	0	0	0	0	0	0	0	0	0	0	0	0	0	0	0	0	0	0	0	0	0	0	0	0	0	0	0	0	0
1,4-Bis(2-ethylhexyl) sulfosuccinate 15	0	0	0	0	0	0	0	0	0	0	0	0	0	0	0	0	0	0	0	0	0	0	0	0	0	0	0	0	0	0	0	0	0
1,4-Bis(2-ethylhexyl) sulfosuccinate 16	0	0	0	0	0	0	0	0	0	0	0	0	0	0	0	0	0	0	0	0	0	0	0	0	0	0	0	0	0	0	0	0	0
1,4-Bis(2-ethylhexyl) sulfosuccinate 17	0	0	0	0	0	0	0	0	0	0	0	0	0	0	0	0	0	0	0	0	0	0	0	0	0	0	0	0	0	0	0	0	0
1,4-Bis(2-ethylhexyl) sulfosuccinate 18	0	0	0	0	0	0	0	0	0	0	0	0	0	0	0	0	0	0	0	0	0	0	0	0	0	0	0	0	0	0	0	0	0
1,4-Bis(2-ethylhexyl) sulfosuccinate 19	0	0	0	0	0	0	0	0	0	0	0	0	0	0	0	0	0	0	0	0	0	0	0	0	0	0	0	0	0	0	0	0	0
1,4-Bis(2-ethylhexyl) sulfosuccinate 20	0	0	0	0	0	0	0	0	0	0	0	0	0	0	0	0	0	0	0	0	0	0	0	0	0	0	0	0	0	0	0	0	0
Metabolite: 2-ACETOLACTATE	Formula: C5H8O4	Mass: 132.0423
-----------------------------------------------------------------------------
Group: 1
2-Acetolactate C5H8O4	blank1r	blank2r	blank3r	blank4	blank5	blank6	pooled_1	pooled_10	pooled_11	pooled_2	pooled_3	pooled_4	pooled_5	pooled_6	pooled_7	pooled_8	pooled_9	JK05	JK06	JK13	JK14	JK07	JK08	JK15	JK16	JK01	JK02	JK09	JK10	JK03	JK04	JK11	JK12
2-Acetolactate 0	6.19403e+06	3.74793e+06	3.45042e+06	4.29413e+06	4.34125e+06	4.21874e+06	5.80363e+06	3.74962e+06	3.80412e+06	5.262e+06	4.90051e+06	4.99462e+06	4.78009e+06	4.99383e+06	3.96204e+06	4.13352e+06	4.14968e+06	5.7136e+06	7.10823e+06	7.32789e+06	5.13997e+06	5.71764e+06	6.10511e+06	6.9905e+06	5.73381e+06	4.35185e+06	4.3349e+06	4.41715e+06	4.50283e+06	5.19967e+06	5.6828e+06	4.42941e+06	4.06514e+06
2-Acetolactate 1	74639.3	24635.2	0	78601.3	60071.3	95006.4	63462.3	24238.2	0	52132.8	52157.2	0	43781	0	0	27359.9	0	0	38759.4	0	0	0	0	47057.3	0	0	0	0	0	0	0	0	0
2-Acetolactate 2	0	0	0	0	0	0	0	0	0	0	0	0	0	0	0	0	0	0	0	0	0	0	0	0	0	0	0	0	0	0	0	0	0
2-Acetolactate 3	0	0	0	0	0	0	0	0	0	0	0	0	0	0	0	0	0	0	0	0	0	0	0	0	0	0	0	0	0	0	0	0	0
2-Acetolactate 4	0	0	0	0	0	0	0	0	0	0	0	0	0	0	0	0	0	0	0	0	0	0	0	0	0	0	0	0	0	0	0	0	0
2-Acetolactate 5	0	0	0	0	0	0	0	0	0	0	0	0	0	0	0	0	0	0	0	0	0	0	0	38885.7	109914	0	0	0	0	0	0	0	0
Metabolite: 2-C-METHYL-D-ERYTHRITOL 4-PHOSPHATE	Formula: C5H13O7P	Mass: 216.0399
-----------------------------------------------------------------------------
Group: 1
2-C-Methyl-D-erythritol 4-phosphate C5H13O7P	blank1r	blank2r	blank3r	blank4	blank5	blank6	pooled_1	pooled_10	pooled_11	pooled_2	pooled_3	pooled_4	pooled_5	pooled_6	pooled_7	pooled_8	pooled_9	JK05	JK06	JK13	JK14	JK07	JK08	JK15	JK16	JK01	JK02	JK09	JK10	JK03	JK04	JK11	JK12
2-C-Methyl-D-erythritol 4-phosphate 0	0	0	0	0	0	0	3.67875e+08	2.25037e+08	2.88458e+08	3.25385e+08	3.22707e+08	3.33598e+08	3.29906e+08	3.34853e+08	3.05511e+08	2.38929e+08	2.78755e+08	7.40467e+08	1.91191e+09	1.84758e+09	8.08516e+08	1.02957e+09	9.84032e+08	1.36848e+09	1.12983e+09	1.13281e+09	4.4117e+08	3.66426e+08	5.7125e+08	6.81405e+08	1.07982e+09	6.83512e+08	6.43595e+08
2-C-Methyl-D-erythritol 4-phosphate 1	0	0	0	0	0	0	2.428e+07	1.50993e+07	1.92324e+07	2.15098e+07	2.15624e+07	2.18626e+07	2.15806e+07	2.25526e+07	2.03189e+07	1.58524e+07	1.85724e+07	4.89936e+07	1.28972e+08	1.23146e+08	5.34192e+07	6.73912e+07	6.44711e+07	9.20556e+07	7.46777e+07	7.54827e+07	2.89564e+07	2.36815e+07	3.7161e+07	4.46671e+07	7.28252e+07	4.56277e+07	4.20095e+07
2-C-Methyl-D-erythritol 4-phosphate 2	0	0	0	0	0	0	0	0	0	0	0	0	0	0	0	0	0	0	0	0	0	0	0	0	0	0	0	0	0	0	0	0	0
2-C-Methyl-D-erythritol 4-phosphate 3	0	0	0	0	0	0	0	0	0	0	0	0	0	0	0	0	0	0	0	0	0	0	0	47783.7	334170	0	0	0	0	792066	470010	0	126271
2-C-Methyl-D-erythritol 4-phosphate 4	0	0	0	0	0	0	621564	264539	430355	322912	522719	515005	392072	463274	460370	351855	387291	1.07028e+06	2.03216e+06	1.38405e+06	1.17843e+06	1.33266e+06	1.28571e+06	1.53142e+06	1.91436e+06	2.1584e+06	1.33691e+06	680277	360733	836919	615285	547464	469903
2-C-Methyl-D-erythritol 4-phosphate 5	0	0	0	0	0	0	0	0	0	0	0	0	0	0	0	0	0	0	0	0	0	0	0	0	49366.6	0	0	0	0	0	0	0	0
Metabolite: 2-HYDROXY-3-OXOPROPANOATE	Formula: C3H4O4	Mass: 104.011
-----------------------------------------------------------------------------
Group: 1
2-Hydroxy-3-oxopropanoate C3H4O4	blank1r	blank2r	blank3r	blank4	blank5	blank6	pooled_1	pooled_10	pooled_11	pooled_2	pooled_3	pooled_4	pooled_5	pooled_6	pooled_7	pooled_8	pooled_9	JK05	JK06	JK13	JK14	JK07	JK08	JK15	JK16	JK01	JK02	JK09	JK10	JK03	JK04	JK11	JK12
2-Hydroxy-3-oxopropanoate 0	7.39007e+06	1.34081e+06	1.43508e+06	1.21804e+06	1.3482e+06	1.29544e+06	2.8323e+06	1.82071e+06	2.28708e+06	2.46464e+06	2.52546e+06	2.47113e+06	2.65998e+06	2.68749e+06	2.76752e+06	1.87691e+06	2.15161e+06	2.64538e+06	3.58546e+06	1.90389e+06	2.19423e+06	2.97079e+06	3.227e+06	3.10976e+06	2.32221e+06	3.84027e+06	2.69131e+06	3.21581e+06	2.61203e+06	3.28586e+06	3.22922e+06	2.31754e+06	2.30429e+06
2-Hydroxy-3-oxopropanoate 1	86141	0	0	0	0	0	55331.1	0	0	35374.9	23687.3	27079.9	28823.4	0	0	0	0	69021.1	102530	0	0	67042.3	54094.7	34258.7	47257.3	80577.5	52034.5	90518.1	44452.9	110564	0	0	0
2-Hydroxy-3-oxopropanoate 2	0	0	0	0	0	0	0	0	0	0	0	0	0	0	0	0	0	0	0	0	0	0	0	0	0	0	0	0	0	0	0	0	0
2-Hydroxy-3-oxopropanoate 3	0	0	0	0	0	0	0	0	0	0	0	0	0	0	0	0	0	0	0	0	0	0	0	0	0	0	0	0	0	0	0	0	0
Metabolite: 2-HYDROXYETHANESULFONATE	Formula: C2H6O4S	Mass: 125.9987
-----------------------------------------------------------------------------
Group: 1
2-Hydroxyethanesulfonate C2H6O4S	blank1r	blank2r	blank3r	blank4	blank5	blank6	pooled_1	pooled_10	pooled_11	pooled_2	pooled_3	pooled_4	pooled_5	pooled_6	pooled_7	pooled_8	pooled_9	JK05	JK06	JK13	JK14	JK07	JK08	JK15	JK16	JK01	JK02	JK09	JK10	JK03	JK04	JK11	JK12
2-Hydroxyethanesulfonate 0	269869	84033	538654	697791	706688	733746	834907	958752	876524	924784	925793	893721	920322	914357	1.04856e+06	1.00427e+06	881664	1.11307e+06	1.8513e+06	1.18019e+06	852623	867210	1.27342e+06	1.23439e+06	988535	1.43211e+06	945325	845783	1.02291e+06	1.00671e+06	1.27675e+06	933807	791258
2-Hydroxyethanesulfonate 1	0	0	0	0	0	0	0	0	0	0	0	0	0	0	0	0	0	0	0	0	0	0	0	0	0	0	0	0	0	0	0	0	0
2-Hydroxyethanesulfonate 2	0	0	0	0	0	0	0	0	0	0	0	0	0	0	0	0	0	0	0	0	0	0	0	0	0	0	0	0	0	0	0	0	0
Metabolite: 2-OXOGLUTARAMATE	Formula: C5H7NO4	Mass: 145.0375
-----------------------------------------------------------------------------
Group: 1
2-Oxoglutaramate C5H7NO4	blank1r	blank2r	blank3r	blank4	blank5	blank6	pooled_1	pooled_10	pooled_11	pooled_2	pooled_3	pooled_4	pooled_5	pooled_6	pooled_7	pooled_8	pooled_9	JK05	JK06	JK13	JK14	JK07	JK08	JK15	JK16	JK01	JK02	JK09	JK10	JK03	JK04	JK11	JK12
2-Oxoglutaramate 0	348576	0	45441.1	99730.3	75797.1	70558.3	1.47188e+07	1.38834e+07	1.31948e+07	1.482e+07	1.47621e+07	1.46227e+07	1.46847e+07	1.45612e+07	1.50924e+07	1.4747e+07	1.42733e+07	8.09808e+07	1.15779e+08	355705	316506	8.25059e+07	8.12529e+07	256660	217129	9.79307e+07	8.22289e+07	248393	250856	1.0925e+08	1.04169e+08	391499	325480
2-Oxoglutaramate 1	0	0	0	0	0	0	676328	563995	606153	600415	572311	604831	559682	609618	608986	483818	476867	4.25393e+06	5.97752e+06	0	0	4.28626e+06	4.20316e+06	0	0	5.09814e+06	4.34106e+06	0	0	5.94514e+06	5.3911e+06	0	0
2-Oxoglutaramate 2	0	0	0	0	0	0	0	0	0	0	0	0	0	0	0	0	0	0	0	0	0	30339.6	0	0	0	0	0	0	0	0	0	0	0
2-Oxoglutaramate 3	0	0	0	0	0	0	0	0	0	0	0	0	0	0	0	0	0	0	0	0	0	0	0	0	0	0	0	0	0	0	0	0	0
2-Oxoglutaramate 4	0	0	0	0	0	0	0	0	0	0	0	0	0	0	0	0	0	0	0	0	0	0	0	0	0	0	0	0	0	0	0	0	0
2-Oxoglutaramate 5	0	0	0	0	0	0	0	0	0	0	0	0	0	0	0	0	0	0	0	0	0	0	0	0	0	0	0	0	58156.2	0	0	0	0
Group: 2
2-Oxoglutaramate C5H7NO4	blank1r	blank2r	blank3r	blank4	blank5	blank6	pooled_1	pooled_10	pooled_11	pooled_2	pooled_3	pooled_4	pooled_5	pooled_6	pooled_7	pooled_8	pooled_9	JK05	JK06	JK13	JK14	JK07	JK08	JK15	JK16	JK01	JK02	JK09	JK10	JK03	JK04	JK11	JK12
2-Oxoglutaramate 0	250431	77372.8	312480	299006	292927	257402	9.89254e+06	1.02691e+07	9.43983e+06	9.68818e+06	9.6735e+06	9.81836e+06	9.8729e+06	9.71908e+06	1.03297e+07	1.01817e+07	9.92942e+06	3.34624e+07	2.32101e+07	3.06655e+07	2.07451e+07	2.44069e+07	3.12806e+07	2.59415e+07	2.33486e+07	4.14151e+07	4.86141e+07	5.62594e+07	6.31787e+07	4.43123e+07	5.7327e+07	5.58204e+07	5.17989e+07
2-Oxoglutaramate 1	0	0	0	0	0	0	437898	442197	395000	470095	466768	466708	435009	455544	428083	535805	532238	1.6108e+06	1.16837e+06	1.60495e+06	1.02203e+06	1.3064e+06	1.63037e+06	1.22809e+06	1.14248e+06	2.20135e+06	2.61207e+06	3.00051e+06	3.34396e+06	2.29104e+06	3.03092e+06	2.88716e+06	2.7822e+06
2-Oxoglutaramate 2	0	0	0	0	0	0	0	0	0	0	0	0	0	0	0	0	0	0	0	0	0	0	0	0	0	0	0	0	0	0	0	0	0
2-Oxoglutaramate 3	0	0	0	0	0	0	0	0	0	0	0	0	0	0	0	0	0	0	0	0	0	0	0	0	0	0	0	0	0	0	0	0	0
2-Oxoglutaramate 4	0	0	0	0	0	0	1.05019e+07	1.08803e+07	1.04756e+07	1.07256e+07	1.02074e+07	1.04593e+07	1.02491e+07	1.06563e+07	1.0717e+07	1.02345e+07	1.02145e+07	2.29069e+07	2.51902e+07	3.3127e+07	2.01789e+07	2.0374e+07	2.19415e+07	2.84879e+07	2.4431e+07	3.04425e+07	2.87472e+07	3.44067e+07	3.28258e+07	2.24873e+07	2.90246e+07	2.99572e+07	3.15308e+07
2-Oxoglutaramate 5	0	0	0	0	0	0	277813	156660	154786	0	162815	271234	120108	212648	84385.2	98192.2	49844.7	498623	353010	599610	264168	284543	309709	317807	193342	277213	331247	212231	771098	339561	382537	654425	451367
Group: 3
2-Oxoglutaramate C5H7NO4	blank1r	blank2r	blank3r	blank4	blank5	blank6	pooled_1	pooled_10	pooled_11	pooled_2	pooled_3	pooled_4	pooled_5	pooled_6	pooled_7	pooled_8	pooled_9	JK05	JK06	JK13	JK14	JK07	JK08	JK15	JK16	JK01	JK02	JK09	JK10	JK03	JK04	JK11	JK12
2-Oxoglutaramate 0	513075	96289.3	143829	213151	208464	235934	965256	1.01021e+06	820864	910191	1.00787e+06	996548	950068	958107	996584	946632	1.0645e+06	2.92045e+06	2.99754e+06	2.00068e+06	1.46835e+06	2.77535e+06	3.15738e+06	1.64601e+06	1.71579e+06	3.1151e+06	3.31257e+06	2.1576e+06	2.35778e+06	4.75902e+06	4.85235e+06	3.28064e+06	2.50703e+06
2-Oxoglutaramate 1	0	0	0	0	0	0	0	0	0	0	0	0	0	0	0	0	0	27793.4	23241.1	0	0	23002.2	0	0	0	0	24563.2	0	0	63809.1	79479.9	90990.2	36557.6
2-Oxoglutaramate 2	0	0	0	0	0	0	0	0	0	0	0	0	0	0	0	0	0	0	0	0	0	0	0	0	0	0	0	0	0	0	0	0	0
2-Oxoglutaramate 3	0	0	0	0	0	0	0	0	0	0	0	0	0	0	0	0	0	0	0	0	0	0	0	0	0	0	0	0	0	0	0	0	0
2-Oxoglutaramate 4	0	0	0	0	0	0	0	0	0	0	0	0	0	0	0	0	0	0	0	0	0	0	0	0	0	0	0	0	0	0	0	0	0
2-Oxoglutaramate 5	0	26016.9	46471.5	0	0	0	0	39029.1	0	0	0	0	0	0	0	0	16141	0	29862.7	39167.4	0	24544.9	0	16483.2	0	25525.6	0	0	34204	0	0	23747	38728.4
Metabolite: 2-OXOGLUTARATE	Formula: C5H6O5	Mass: 146.0215
-----------------------------------------------------------------------------
Group: 1
2-Oxoglutarate C5H6O5	blank1r	blank2r	blank3r	blank4	blank5	blank6	pooled_1	pooled_10	pooled_11	pooled_2	pooled_3	pooled_4	pooled_5	pooled_6	pooled_7	pooled_8	pooled_9	JK05	JK06	JK13	JK14	JK07	JK08	JK15	JK16	JK01	JK02	JK09	JK10	JK03	JK04	JK11	JK12
2-Oxoglutarate 0	581587	153922	259652	392658	407270	382129	4.80518e+07	1.91723e+07	2.69886e+07	3.30221e+07	3.33613e+07	3.30897e+07	3.39727e+07	3.38541e+07	3.55952e+07	2.11766e+07	2.3132e+07	9.91863e+07	1.08941e+08	1.51326e+08	1.25649e+08	6.71002e+07	1.26579e+08	1.13333e+08	9.22979e+07	4.44937e+07	2.72793e+07	1.06768e+08	159570418	2.50017e+08	2.47269e+08	2.81647e+08	3.0679e+08
2-Oxoglutarate 1	0	0	0	0	0	0	2.63793e+06	1.04855e+06	1.4412e+06	1.81758e+06	1.79463e+06	1.74562e+06	1.89869e+06	1.81613e+06	1.97148e+06	994892	1.20982e+06	5.43425e+06	6.00885e+06	8.10753e+06	6.7699e+06	3.56478e+06	6.98903e+06	6.56076e+06	5.11561e+06	2.44301e+06	1.55422e+06	5.97086e+06	8.72202e+06	1.398e+07	1.34432e+07	1.60439e+07	1.72038e+07
2-Oxoglutarate 2	0	0	0	0	0	0	185436	40479.9	86891.8	129523	121837	126238	140733	140189	176493	47095.1	85563.4	0	0	75195.3	39579.7	704189	1.4312e+06	1.24218e+06	1.16828e+06	0	0	0	59472.3	1.98501e+06	2.35791e+06	2.76501e+06	3.40025e+06
2-Oxoglutarate 3	0	0	0	0	0	0	0	0	0	0	0	0	22629	0	0	0	0	63022.3	0	116199	0	157281	313003	231017	215128	0	0	0	0	256556	355981	513523	510265
2-Oxoglutarate 4	0	0	0	0	0	0	0	0	0	0	0	0	0	0	0	0	0	0	0	0	0	133311	479880	451588	320750	0	0	0	0	183558	180043	166059	152817
2-Oxoglutarate 5	0	0	0	0	0	0	0	0	0	0	0	0	0	0	0	0	0	0	0	0	0	0	0	0	0	0	0	0	0	0	0	0	0
Metabolite: 3-(3-HYDROXY-PHENYL)-PROPANOIC ACID	Formula: C9H10O3	Mass: 166.063
-----------------------------------------------------------------------------
Group: 1
3-(3-Hydroxy-phenyl)-propanoic acid C9H10O3	blank1r	blank2r	blank3r	blank4	blank5	blank6	pooled_1	pooled_10	pooled_11	pooled_2	pooled_3	pooled_4	pooled_5	pooled_6	pooled_7	pooled_8	pooled_9	JK05	JK06	JK13	JK14	JK07	JK08	JK15	JK16	JK01	JK02	JK09	JK10	JK03	JK04	JK11	JK12
3-(3-Hydroxy-phenyl)-propanoic acid 0	0	112990	120482	156852	169576	158459	1.36626e+06	1.57363e+06	1.75516e+06	1.52356e+06	1.43964e+06	1.19716e+06	1.3716e+06	1.39303e+06	1.17301e+06	1.26083e+06	1.50995e+06	5.47245e+06	2.17679e+06	3.84391e+06	2.7111e+06	3.47987e+06	4.10677e+06	2.67487e+06	2.99126e+06	4.66888e+06	4.03935e+06	9.94476e+06	9.93594e+06	6.28792e+06	8.88336e+06	8.03446e+06	6.18816e+06
3-(3-Hydroxy-phenyl)-propanoic acid 1	0	0	0	0	0	0	0	0	0	0	0	0	0	0	0	0	0	121459	0	109395	0	0	62014.1	0	42299.4	107668	113420	614715	635540	273550	421968	415042	157864
3-(3-Hydroxy-phenyl)-propanoic acid 2	0	0	0	0	0	0	0	0	0	0	0	0	0	0	0	0	0	0	0	0	0	0	0	0	0	0	0	0	0	0	0	0	0
3-(3-Hydroxy-phenyl)-propanoic acid 3	0	0	0	0	0	0	0	0	0	0	0	0	0	0	0	0	0	0	0	0	0	0	0	0	0	0	0	0	0	0	0	0	0
3-(3-Hydroxy-phenyl)-propanoic acid 4	0	0	0	26649.5	0	0	0	0	0	0	0	0	0	0	0	0	0	0	0	0	0	0	0	0	0	0	0	0	0	0	0	0	0
3-(3-Hydroxy-phenyl)-propanoic acid 5	0	0	0	0	0	0	0	0	0	0	0	0	0	0	0	0	0	0	0	0	0	0	0	0	0	0	0	0	0	0	0	0	0
3-(3-Hydroxy-phenyl)-propanoic acid 6	0	0	0	0	0	0	0	0	0	0	0	0	0	0	0	0	0	0	0	0	0	0	0	0	0	0	0	0	0	0	0	0	0
3-(3-Hydroxy-phenyl)-propanoic acid 7	0	0	0	0	0	0	0	0	0	0	0	0	0	0	0	0	0	0	0	0	0	0	0	0	0	0	0	0	0	0	0	0	0
3-(3-Hydroxy-phenyl)-propanoic acid 8	784596	126615	210538	84925	104177	94809.8	980065	1.21409e+06	1.32657e+06	1.13381e+06	1.03126e+06	1.03129e+06	1.00285e+06	1.19393e+06	979018	1.14461e+06	1.04807e+06	3.46537e+06	3.07807e+06	2.77921e+06	2.2619e+06	5.42062e+06	2.79183e+06	2.24694e+06	2.89265e+06	3.42537e+06	2.75448e+06	5.35028e+06	3.39515e+06	3.04198e+06	2.55713e+06	2.13928e+06	2.97727e+06
3-(3-Hydroxy-phenyl)-propanoic acid 9	0	0	0	0	0	0	0	0	0	0	0	0	0	0	0	0	0	84578.6	0	0	0	219276	0	51877.7	85460.4	0	0	145377	124586	0	68646.9	49701.3	0
Group: 2
3-(3-Hydroxy-phenyl)-propanoic acid C9H10O3	blank1r	blank2r	blank3r	blank4	blank5	blank6	pooled_1	pooled_10	pooled_11	pooled_2	pooled_3	pooled_4	pooled_5	pooled_6	pooled_7	pooled_8	pooled_9	JK05	JK06	JK13	JK14	JK07	JK08	JK15	JK16	JK01	JK02	JK09	JK10	JK03	JK04	JK11	JK12
3-(3-Hydroxy-phenyl)-propanoic acid 0	0	158842	126968	294246	225907	268547	1.81136e+06	902717	434821	1.69738e+06	1.39122e+06	1.55065e+06	1.18235e+06	1.17467e+06	1.59915e+06	1.28249e+06	1.37371e+06	5.87285e+06	1.05787e+06	1.70797e+06	1.5701e+06	1.9279e+06	5.87841e+06	1.47063e+06	1.13967e+06	1.71795e+06	2.36984e+06	4.4596e+06	6.74236e+06	8.3548e+06	7.99092e+06	5.67379e+06	4.85631e+06
3-(3-Hydroxy-phenyl)-propanoic acid 1	0	0	0	0	0	0	0	0	0	0	0	0	0	0	0	0	0	73517.7	0	0	0	0	125428	0	0	0	0	0	103194	215295	154683	54006.8	0
3-(3-Hydroxy-phenyl)-propanoic acid 2	0	0	0	0	0	0	0	0	0	0	0	0	0	0	0	0	0	0	0	0	0	0	0	0	0	0	0	0	0	0	0	0	0
3-(3-Hydroxy-phenyl)-propanoic acid 3	0	0	0	0	0	0	0	0	0	0	0	0	0	0	0	0	0	0	0	0	0	0	0	0	0	0	0	0	0	0	0	0	0
3-(3-Hydroxy-phenyl)-propanoic acid 4	0	0	0	0	0	0	0	0	0	0	0	0	0	0	0	0	0	0	0	0	0	0	0	0	0	0	0	0	0	0	0	0	0
3-(3-Hydroxy-phenyl)-propanoic acid 5	0	0	0	0	0	0	0	0	0	0	0	0	0	0	0	0	0	0	0	0	0	0	0	0	0	0	0	0	0	0	0	0	0
3-(3-Hydroxy-phenyl)-propanoic acid 6	0	0	0	0	0	0	0	0	0	0	0	0	0	0	0	0	0	0	0	0	0	0	0	0	0	0	0	0	0	0	0	0	0
3-(3-Hydroxy-phenyl)-propanoic acid 7	0	0	0	0	0	0	0	0	0	0	0	0	0	0	0	0	0	0	0	0	0	0	0	0	0	0	0	0	0	0	0	0	0
3-(3-Hydroxy-phenyl)-propanoic acid 8	1.14473e+06	290941	399533	204715	160674	140264	602702	138713	180654	348894	249664	344292	309637	259549	427067	306499	304615	1.18521e+06	623985	396684	485338	1.29548e+06	1.03838e+06	279835	440024	417476	451493	605860	552367	923968	593845	317541	636610
3-(3-Hydroxy-phenyl)-propanoic acid 9	0	0	0	0	0	0	0	0	0	0	0	0	0	0	0	0	0	0	0	0	0	0	0	0	0	0	0	0	0	0	0	0	0
Group: 3
3-(3-Hydroxy-phenyl)-propanoic acid C9H10O3	blank1r	blank2r	blank3r	blank4	blank5	blank6	pooled_1	pooled_10	pooled_11	pooled_2	pooled_3	pooled_4	pooled_5	pooled_6	pooled_7	pooled_8	pooled_9	JK05	JK06	JK13	JK14	JK07	JK08	JK15	JK16	JK01	JK02	JK09	JK10	JK03	JK04	JK11	JK12
3-(3-Hydroxy-phenyl)-propanoic acid 0	0	91142.4	100551	172619	116170	158848	1.25189e+06	0	0	972076	528391	951631	375178	654436	955958	822814	895596	3.51711e+06	254497	333345	332010	255525	3.49887e+06	317673	243532	563430	657581	1.69468e+06	2.11744e+06	5.19915e+06	5.01752e+06	1.50644e+06	1.66582e+06
3-(3-Hydroxy-phenyl)-propanoic acid 1	0	0	0	0	0	0	0	0	0	0	0	0	0	0	0	0	0	73517.7	0	0	0	0	125428	0	0	0	0	0	0	0	154683	0	0
3-(3-Hydroxy-phenyl)-propanoic acid 2	0	0	0	0	0	0	0	0	0	0	0	0	0	0	0	0	0	0	0	0	0	0	0	0	0	0	0	0	0	0	0	0	0
3-(3-Hydroxy-phenyl)-propanoic acid 3	0	0	0	0	0	0	0	0	0	0	0	0	0	0	0	0	0	0	0	0	0	0	0	0	0	0	0	0	0	0	0	0	0
3-(3-Hydroxy-phenyl)-propanoic acid 4	0	0	0	0	0	0	0	0	0	0	0	0	0	0	0	0	0	0	0	0	0	0	0	0	0	0	0	0	0	0	0	0	0
3-(3-Hydroxy-phenyl)-propanoic acid 5	0	0	0	0	0	0	0	0	0	0	0	0	0	0	0	0	0	0	0	0	0	0	0	0	0	0	0	0	0	0	0	0	0
3-(3-Hydroxy-phenyl)-propanoic acid 6	0	0	0	0	0	0	0	0	0	0	0	0	0	0	0	0	0	0	0	0	0	0	0	0	0	0	0	0	0	0	0	0	0
3-(3-Hydroxy-phenyl)-propanoic acid 7	0	0	0	0	0	0	0	0	0	0	0	0	0	0	0	0	0	0	0	0	0	0	0	0	0	0	0	0	0	0	0	0	0
3-(3-Hydroxy-phenyl)-propanoic acid 8	567423	160866	220586	79715.5	105397	48649.8	317510	0	72671.9	0	0	137437	71151.8	87174	92721.7	0	0	698304	86108.1	71730.9	0	118048	524775	0	71072.9	118572	0	97634.8	0	392508	283259	0	143066
3-(3-Hydroxy-phenyl)-propanoic acid 9	0	0	0	0	0	0	0	0	0	0	0	0	0	0	0	0	0	0	0	0	0	0	0	0	0	0	0	0	0	0	0	0	0
Group: 4
3-(3-Hydroxy-phenyl)-propanoic acid C9H10O3	blank1r	blank2r	blank3r	blank4	blank5	blank6	pooled_1	pooled_10	pooled_11	pooled_2	pooled_3	pooled_4	pooled_5	pooled_6	pooled_7	pooled_8	pooled_9	JK05	JK06	JK13	JK14	JK07	JK08	JK15	JK16	JK01	JK02	JK09	JK10	JK03	JK04	JK11	JK12
3-(3-Hydroxy-phenyl)-propanoic acid 0	0	100496	97915.7	127711	210718	129668	1.37816e+06	1.31972e+06	1.32831e+06	1.56648e+06	1.53784e+06	1.27561e+06	1.31007e+06	1.28164e+06	1.19916e+06	1.26612e+06	1.24427e+06	5.53789e+06	1.91586e+06	3.23485e+06	2.17455e+06	2.97056e+06	4.65761e+06	2.3597e+06	1.93225e+06	3.48619e+06	3.46436e+06	8.14495e+06	9.48232e+06	6.15438e+06	6.87002e+06	7.45777e+06	5.61622e+06
3-(3-Hydroxy-phenyl)-propanoic acid 1	0	0	0	0	0	0	0	0	0	0	0	0	0	0	0	0	0	106360	0	0	0	0	0	0	0	51938.7	37066.2	323935	495570	203210	279756	300913	120416
3-(3-Hydroxy-phenyl)-propanoic acid 2	0	0	0	0	0	0	0	0	0	0	0	0	0	0	0	0	0	0	0	0	0	0	0	0	0	0	0	0	0	0	0	0	0
3-(3-Hydroxy-phenyl)-propanoic acid 3	0	0	0	0	0	0	0	0	0	0	0	0	0	0	0	0	0	0	0	0	0	0	0	0	0	0	0	0	0	0	0	0	0
3-(3-Hydroxy-phenyl)-propanoic acid 4	0	0	0	0	0	0	0	0	0	0	0	0	0	0	0	0	0	0	0	0	0	0	0	0	0	0	0	0	0	0	0	0	0
3-(3-Hydroxy-phenyl)-propanoic acid 5	0	0	0	0	0	0	0	0	0	0	0	0	0	0	0	0	0	0	0	0	0	0	0	0	0	0	0	0	0	0	0	0	0
3-(3-Hydroxy-phenyl)-propanoic acid 6	0	0	0	0	0	0	0	0	0	0	0	0	0	0	0	0	0	0	0	0	0	0	0	0	0	0	0	0	0	0	0	0	0
3-(3-Hydroxy-phenyl)-propanoic acid 7	0	0	0	0	0	0	0	0	0	0	0	0	0	0	0	0	0	0	0	0	0	0	0	0	0	0	0	0	0	0	0	0	0
3-(3-Hydroxy-phenyl)-propanoic acid 8	645028	123341	239067	106209	69631.2	84594.9	887609	669829	692295	1.00787e+06	940933	780664	733281	676085	710028	891788	816769	2.87146e+06	1.7245e+06	1.53508e+06	1.3902e+06	3.31429e+06	2.57481e+06	1.41362e+06	1.50147e+06	1.79385e+06	1.81291e+06	2.80135e+06	2.06298e+06	2.14324e+06	1.56642e+06	1.258e+06	1.84105e+06
3-(3-Hydroxy-phenyl)-propanoic acid 9	0	0	0	0	0	0	0	0	0	0	0	0	0	0	0	0	0	59918.6	0	0	0	56348.7	0	0	0	0	0	0	0	0	0	0	0
Metabolite: 3-(4-HYDROXYPHENYL)PYRUVATE	Formula: C9H8O4	Mass: 180.0423
-----------------------------------------------------------------------------
Group: 1
3-(4-Hydroxyphenyl)pyruvate C9H8O4	blank1r	blank2r	blank3r	blank4	blank5	blank6	pooled_1	pooled_10	pooled_11	pooled_2	pooled_3	pooled_4	pooled_5	pooled_6	pooled_7	pooled_8	pooled_9	JK05	JK06	JK13	JK14	JK07	JK08	JK15	JK16	JK01	JK02	JK09	JK10	JK03	JK04	JK11	JK12
3-(4-Hydroxyphenyl)pyruvate 0	87282.1	0	0	0	0	0	1.06153e+07	1.07106e+07	1.15013e+07	1.05252e+07	1.04042e+07	1.05269e+07	1.0434e+07	1.04736e+07	1.04853e+07	1.07981e+07	1.02643e+07	5.9237e+07	3.20961e+07	3.59403e+07	2.35802e+07	3.32131e+07	4.46178e+07	2.78705e+07	2.68576e+07	3.26112e+07	2.61891e+07	4.22652e+07	4.79708e+07	5.00011e+07	4.76048e+07	4.7265e+07	3.56319e+07
3-(4-Hydroxyphenyl)pyruvate 1	0	0	0	0	0	0	799974	819763	891638	902263	810066	797026	775411	753012	842619	893815	834955	5.13555e+06	2.48537e+06	3.16117e+06	2.18108e+06	2.68819e+06	3.8838e+06	2.49376e+06	2.21292e+06	2.38838e+06	1.89616e+06	3.74629e+06	4.22724e+06	4.17938e+06	4.15954e+06	4.24506e+06	3.0047e+06
3-(4-Hydroxyphenyl)pyruvate 2	0	0	0	0	0	0	0	0	0	0	0	0	0	0	0	0	0	0	0	0	0	0	0	0	0	0	0	0	0	0	0	0	0
3-(4-Hydroxyphenyl)pyruvate 3	0	0	0	0	0	0	0	0	0	0	0	0	0	0	0	0	0	0	0	0	0	0	0	0	0	0	0	0	0	0	0	0	0
3-(4-Hydroxyphenyl)pyruvate 4	0	0	0	0	0	0	0	0	0	0	0	0	0	0	0	0	0	0	0	0	0	0	0	0	0	0	0	0	0	0	0	0	0
3-(4-Hydroxyphenyl)pyruvate 5	0	0	0	0	0	0	0	0	0	0	0	0	0	0	0	0	0	0	0	0	0	0	0	0	0	0	0	0	0	0	0	0	0
3-(4-Hydroxyphenyl)pyruvate 6	0	0	0	0	0	0	0	0	0	0	0	0	0	0	0	0	0	0	0	0	0	0	0	0	0	0	0	0	0	0	0	0	0
3-(4-Hydroxyphenyl)pyruvate 7	0	0	0	0	0	0	0	0	0	0	0	0	0	0	0	0	0	0	0	0	0	0	0	0	0	0	0	0	0	0	0	0	0
3-(4-Hydroxyphenyl)pyruvate 8	1.2738e+06	355965	670558	600288	562266	495037	836406	704109	786169	824008	729270	767838	799739	866220	790043	764832	895366	1.17318e+06	980038	913311	740285	1.21607e+06	1.21226e+06	908733	899144	1.10864e+06	1.02855e+06	1.31304e+06	809867	1.28797e+06	890588	707310	673394
3-(4-Hydroxyphenyl)pyruvate 9	0	0	0	0	0	0	0	0	0	0	0	0	0	0	0	0	0	0	0	0	0	0	0	0	0	0	0	0	0	0	0	0	0
Metabolite: 3-(PYRAZOL-1-YL)-L-ALANINE	Formula: C6H9N3O2	Mass: 155.0695
-----------------------------------------------------------------------------
Group: 1
3-(Pyrazol-1-yl)-L-alanine C6H9N3O2	blank1r	blank2r	blank3r	blank4	blank5	blank6	pooled_1	pooled_10	pooled_11	pooled_2	pooled_3	pooled_4	pooled_5	pooled_6	pooled_7	pooled_8	pooled_9	JK05	JK06	JK13	JK14	JK07	JK08	JK15	JK16	JK01	JK02	JK09	JK10	JK03	JK04	JK11	JK12
3-(Pyrazol-1-yl)-L-alanine 0	0	0	254917	0	230221	256856	2.57629e+07	2.29174e+07	2.29305e+07	2.57401e+07	2.53779e+07	2.57865e+07	2.55783e+07	2.60988e+07	2.39018e+07	2.35522e+07	2.51737e+07	5.74483e+07	4.57347e+07	5.22006e+07	52449178	5.34496e+07	5.39409e+07	5.48868e+07	5.78056e+07	5.88406e+07	8.4461e+07	5.72482e+07	4.92797e+07	4.84141e+07	5.08783e+07	4.64587e+07	4.42897e+07
3-(Pyrazol-1-yl)-L-alanine 1	0	0	0	0	0	0	1.54629e+06	1.35646e+06	1.3971e+06	1.42747e+06	1.57639e+06	1.46652e+06	1.57569e+06	1.49857e+06	1.44986e+06	1.39275e+06	1.53106e+06	3.31894e+06	2.59348e+06	3.57864e+06	3.25914e+06	3.28996e+06	3.33888e+06	3.44733e+06	3.67867e+06	3.46072e+06	5.38916e+06	3.63898e+06	3.106e+06	3.0138e+06	3.04216e+06	2.88391e+06	2.94705e+06
3-(Pyrazol-1-yl)-L-alanine 2	0	0	0	0	0	0	0	0	0	0	0	0	0	0	0	0	0	0	0	0	0	0	0	0	0	0	0	0	0	0	0	0	0
3-(Pyrazol-1-yl)-L-alanine 3	0	0	0	0	0	0	0	0	0	0	0	0	0	0	0	0	0	0	0	0	0	0	0	0	0	0	0	0	0	0	0	0	0
3-(Pyrazol-1-yl)-L-alanine 4	0	0	0	0	0	0	0	0	0	0	0	0	0	0	0	0	0	0	0	0	0	0	0	0	0	0	0	0	0	0	0	0	0
3-(Pyrazol-1-yl)-L-alanine 5	0	0	0	0	0	0	0	0	0	0	0	0	0	0	0	0	0	0	0	0	0	0	0	0	0	0	0	0	0	0	0	0	0
3-(Pyrazol-1-yl)-L-alanine 6	0	0	0	0	0	0	0	0	0	0	0	0	0	0	0	0	0	0	0	0	0	0	0	0	0	0	0	0	0	0	0	0	0
Group: 2
3-(Pyrazol-1-yl)-L-alanine C6H9N3O2	blank1r	blank2r	blank3r	blank4	blank5	blank6	pooled_1	pooled_10	pooled_11	pooled_2	pooled_3	pooled_4	pooled_5	pooled_6	pooled_7	pooled_8	pooled_9	JK05	JK06	JK13	JK14	JK07	JK08	JK15	JK16	JK01	JK02	JK09	JK10	JK03	JK04	JK11	JK12
3-(Pyrazol-1-yl)-L-alanine 0	128562	135812	279550	263198	288655	309657	7.22984e+06	5.51122e+06	6.3708e+06	6.82633e+06	6.58649e+06	6.68145e+06	6.97397e+06	6.75302e+06	6863442	5.68427e+06	6.17069e+06	2.05453e+07	1.39187e+07	2.25135e+07	1.60206e+07	1.18275e+07	1.95712e+07	1.91003e+07	1.59227e+07	1.46396e+07	1.8468e+07	1.70257e+07	1.94874e+07	1.64391e+07	2.01205e+07	1.89181e+07	2.0053e+07
3-(Pyrazol-1-yl)-L-alanine 1	0	0	0	0	0	0	189957	75189.9	86041.3	141495	141860	112540	101326	137389	169826	94860.8	86229.2	764852	164256	826338	423681	242112	847171	615902	523288	477637	710313	605406	633192	487612	570376	600769	712656
3-(Pyrazol-1-yl)-L-alanine 2	0	0	0	0	0	0	0	0	0	0	0	0	0	0	0	0	0	0	0	0	0	0	0	0	0	0	0	0	0	0	0	0	0
3-(Pyrazol-1-yl)-L-alanine 3	0	0	0	0	0	0	0	0	0	0	0	0	0	0	0	0	0	0	0	0	0	0	0	0	0	0	0	0	0	0	0	0	0
3-(Pyrazol-1-yl)-L-alanine 4	0	0	0	0	0	0	0	0	0	0	0	0	0	0	0	0	0	0	0	0	0	0	0	0	0	0	0	0	0	0	0	0	0
3-(Pyrazol-1-yl)-L-alanine 5	0	0	0	0	0	0	0	0	0	0	0	0	0	0	0	0	0	0	0	0	0	0	0	0	0	0	0	0	0	0	0	0	0
3-(Pyrazol-1-yl)-L-alanine 6	0	0	0	0	0	0	0	0	0	0	0	0	0	0	0	0	0	0	0	0	0	0	0	0	0	0	0	0	0	0	0	0	0
Group: 3
3-(Pyrazol-1-yl)-L-alanine C6H9N3O2	blank1r	blank2r	blank3r	blank4	blank5	blank6	pooled_1	pooled_10	pooled_11	pooled_2	pooled_3	pooled_4	pooled_5	pooled_6	pooled_7	pooled_8	pooled_9	JK05	JK06	JK13	JK14	JK07	JK08	JK15	JK16	JK01	JK02	JK09	JK10	JK03	JK04	JK11	JK12
3-(Pyrazol-1-yl)-L-alanine 0	0	0	0	76390.3	82417.2	0	2.14322e+06	1.32951e+06	1.75786e+06	1.85661e+06	1.73489e+06	1.72949e+06	1.87192e+06	1.78754e+06	1.97979e+06	1.28758e+06	1.63136e+06	4.90898e+06	5.14188e+06	8.67208e+06	4.78911e+06	3358650	5.95557e+06	5.82977e+06	4.90382e+06	4.50777e+06	4.47626e+06	4.28821e+06	5.04311e+06	4.79089e+06	5.86522e+06	5.16917e+06	6.27812e+06
3-(Pyrazol-1-yl)-L-alanine 1	0	0	0	0	0	0	24447.9	0	0	27674.8	0	0	0	23995	0	0	0	116879	80392.7	428776	122025	41892.1	207388	204842	86094.8	96286.2	74820.8	102564	163905	79666.2	152600	47235.9	207366
3-(Pyrazol-1-yl)-L-alanine 2	0	0	0	0	0	0	0	0	0	0	0	0	0	0	0	0	0	0	0	0	0	0	0	0	0	0	0	0	0	0	0	0	0
3-(Pyrazol-1-yl)-L-alanine 3	0	0	0	0	0	0	0	0	0	0	0	0	0	0	0	0	0	0	0	0	0	0	0	0	0	0	0	0	0	0	0	0	0
3-(Pyrazol-1-yl)-L-alanine 4	0	0	0	0	0	0	0	0	0	0	0	0	0	0	0	0	0	0	0	0	0	0	0	0	0	0	0	0	0	0	0	0	0
3-(Pyrazol-1-yl)-L-alanine 5	0	0	0	0	0	0	0	0	0	0	0	0	0	0	0	0	0	0	0	0	0	0	0	0	0	0	0	0	0	0	0	0	0
3-(Pyrazol-1-yl)-L-alanine 6	0	0	0	0	0	0	0	0	0	0	0	0	0	0	0	0	0	0	0	0	0	0	0	0	0	0	0	0	0	0	0	0	0
Group: 4
3-(Pyrazol-1-yl)-L-alanine C6H9N3O2	blank1r	blank2r	blank3r	blank4	blank5	blank6	pooled_1	pooled_10	pooled_11	pooled_2	pooled_3	pooled_4	pooled_5	pooled_6	pooled_7	pooled_8	pooled_9	JK05	JK06	JK13	JK14	JK07	JK08	JK15	JK16	JK01	JK02	JK09	JK10	JK03	JK04	JK11	JK12
3-(Pyrazol-1-yl)-L-alanine 0	0	0	0	0	0	0	672816	1.15267e+06	1.07186e+06	879434	837299	861325	827333	935848	766768	1.25089e+06	1.24796e+06	3.24795e+06	2.01064e+06	2.8675e+06	2.83927e+06	2.57144e+06	2.34046e+06	2.91163e+06	3.07581e+06	2.60323e+06	2.73564e+06	3.08125e+06	3.1578e+06	2.85921e+06	3.05249e+06	3.50094e+06	2.42869e+06
3-(Pyrazol-1-yl)-L-alanine 1	0	0	0	0	0	0	0	0	0	0	0	0	0	0	0	0	0	101423	21889.3	84552.9	72804.6	85056.6	52099	59731	129721	78983.4	73067	93097.9	103453	89484.5	101132	137044	50965.2
3-(Pyrazol-1-yl)-L-alanine 2	0	0	0	0	0	0	0	0	0	0	0	0	0	0	0	0	0	0	0	0	0	0	0	0	0	0	0	0	0	0	0	0	0
3-(Pyrazol-1-yl)-L-alanine 3	0	0	0	0	0	0	0	0	0	0	0	0	0	0	0	0	0	0	0	0	0	0	0	0	0	0	0	0	0	0	0	0	0
3-(Pyrazol-1-yl)-L-alanine 4	0	0	0	0	0	0	0	0	0	0	0	0	0	0	0	0	0	0	0	0	0	0	0	0	0	0	0	0	0	0	0	0	0
3-(Pyrazol-1-yl)-L-alanine 5	0	0	0	0	0	0	0	0	0	0	0	0	0	0	0	0	0	0	0	0	0	0	0	0	0	0	0	0	0	0	0	0	0
3-(Pyrazol-1-yl)-L-alanine 6	0	0	0	0	0	0	0	0	0	0	0	0	0	0	0	0	0	0	0	0	0	0	0	0	0	0	0	0	0	0	0	0	0
Metabolite: 3-PHOSPHO-D-GLYCERATE	Formula: C3H7O7P	Mass: 185.9929
-----------------------------------------------------------------------------
Group: 1
3-Phospho-D-glycerate C3H7O7P	blank1r	blank2r	blank3r	blank4	blank5	blank6	pooled_1	pooled_10	pooled_11	pooled_2	pooled_3	pooled_4	pooled_5	pooled_6	pooled_7	pooled_8	pooled_9	JK05	JK06	JK13	JK14	JK07	JK08	JK15	JK16	JK01	JK02	JK09	JK10	JK03	JK04	JK11	JK12
3-Phospho-D-glycerate 0	0	0	0	0	0	0	6.72918e+06	4.64561e+06	5.57197e+06	6.0829e+06	5.94673e+06	6.11349e+06	6.01727e+06	5.81438e+06	6.5312e+06	5.06578e+06	5.39476e+06	6.72408e+06	1.60667e+07	1.40216e+07	9.03575e+06	2.661e+06	5.17652e+06	2.2277e+06	1.49074e+06	4.43411e+07	2.10709e+07	4.95275e+07	3.53813e+07	2.05194e+07	2.41096e+07	1.95301e+07	2.19577e+07
3-Phospho-D-glycerate 1	0	0	0	0	0	0	178264	0	110961	130861	132611	126480	125611	107215	178845	41134.6	0	107497	508113	368460	206709	46322.1	119443	0	0	1.40007e+06	713459	1.74536e+06	1.10992e+06	642325	661488	580343	723844
3-Phospho-D-glycerate 2	0	0	0	0	0	0	0	0	0	0	0	0	0	0	0	0	0	0	0	0	0	0	85498.5	47902.1	0	0	0	0	0	0	0	0	0
3-Phospho-D-glycerate 3	0	0	0	0	0	0	757033	355681	675332	672297	628190	695645	680332	695584	684733	501756	550045	0	0	0	0	8.09132e+06	1.14977e+07	9.20444e+06	5.07542e+06	0	0	0	0	1.65484e+06	1.75245e+06	1.54078e+06	1.41182e+06
Metabolite: 3,4-DIHYDRO-2H-PYRROLE-2-CARBOXYLATE	Formula: C5H7NO2	Mass: 113.0477
-----------------------------------------------------------------------------
Group: 1
3,4-Dihydro-2H-Pyrrole-2-carboxylate C5H7NO2	blank1r	blank2r	blank3r	blank4	blank5	blank6	pooled_1	pooled_10	pooled_11	pooled_2	pooled_3	pooled_4	pooled_5	pooled_6	pooled_7	pooled_8	pooled_9	JK05	JK06	JK13	JK14	JK07	JK08	JK15	JK16	JK01	JK02	JK09	JK10	JK03	JK04	JK11	JK12
3,4-Dihydro-2H-Pyrrole-2-carboxylate 0	2.43139e+06	1.74378e+06	1.47392e+06	2.98665e+06	2.88008e+06	2.90385e+06	3.75322e+07	2.46972e+07	2.67808e+07	3.36535e+07	3.36624e+07	3.3628e+07	3.47348e+07	3.40509e+07	3.17661e+07	2.49777e+07	2.75422e+07	1.04361e+08	2.58242e+08	2.48594e+08	7.58624e+07	1.00604e+08	1.13879e+08	1.78498e+08	1.10939e+08	1.28998e+08	6.4332e+07	5.7553e+07	8.28509e+07	6.96319e+07	1.07092e+08	8.03735e+07	7.37346e+07
3,4-Dihydro-2H-Pyrrole-2-carboxylate 1	28424.2	0	0	51770.2	26189.8	0	1.99201e+06	1.28099e+06	1.35225e+06	1.6735e+06	1.77498e+06	1.57994e+06	1.76562e+06	1.80125e+06	1.61351e+06	1.24978e+06	1.34565e+06	5.89535e+06	1.39818e+07	1.32448e+07	3.84388e+06	5.20603e+06	6.1805e+06	9.56545e+06	6.13349e+06	6.92704e+06	3.47678e+06	2.97214e+06	4.26134e+06	3.32039e+06	5.61505e+06	4.05695e+06	3.59323e+06
3,4-Dihydro-2H-Pyrrole-2-carboxylate 2	0	0	0	0	0	0	0	0	0	0	0	0	0	0	0	0	0	0	0	60969	0	419037	398850	573472	309916	0	0	0	0	69013.6	62739.3	83133.4	0
3,4-Dihydro-2H-Pyrrole-2-carboxylate 3	0	0	0	0	0	0	1.23727e+06	720081	952233	1.11978e+06	1.17091e+06	1.2355e+06	1.19743e+06	1.21258e+06	1.1755e+06	721334	979949	0	0	0	0	1.31465e+07	1.75148e+07	1.96377e+07	1.42215e+07	0	0	0	0	5.50208e+06	8.32892e+06	6.4186e+06	6.04747e+06
3,4-Dihydro-2H-Pyrrole-2-carboxylate 4	0	0	0	0	0	0	0	0	0	0	0	0	0	0	0	0	0	0	0	0	0	0	130957	95294.9	59150.3	0	0	0	0	0	57373.9	0	0
3,4-Dihydro-2H-Pyrrole-2-carboxylate 5	0	0	0	0	0	0	0	0	0	0	0	0	0	0	0	0	0	0	0	0	0	0	0	0	0	0	0	0	0	0	0	0	0
Metabolite: 4-AMINO-5-HYDROXYMETHYL-2-METHYLPYRIMIDINE	Formula: C6H9N3O	Mass: 139.0746
-----------------------------------------------------------------------------
Group: 1
4-Amino-5-hydroxymethyl-2-methylpyrimidine C6H9N3O	blank1r	blank2r	blank3r	blank4	blank5	blank6	pooled_1	pooled_10	pooled_11	pooled_2	pooled_3	pooled_4	pooled_5	pooled_6	pooled_7	pooled_8	pooled_9	JK05	JK06	JK13	JK14	JK07	JK08	JK15	JK16	JK01	JK02	JK09	JK10	JK03	JK04	JK11	JK12
4-Amino-5-hydroxymethyl-2-methylpyrimidine 0	4.29603e+06	4.37724e+06	4.63711e+06	3.9484e+06	3.97498e+06	3.88789e+06	3.59141e+06	3.35944e+06	3.05681e+06	3.83367e+06	3.57654e+06	3.86475e+06	3.61843e+06	3.54344e+06	3.84272e+06	3.45785e+06	3.30032e+06	3.32714e+06	3.34232e+06	3.41673e+06	3.46442e+06	3.07092e+06	3.52315e+06	3.7454e+06	3.42234e+06	3.18965e+06	3.75023e+06	3.21838e+06	3.05258e+06	3.29924e+06	3.5357e+06	3.39542e+06	3.27731e+06
4-Amino-5-hydroxymethyl-2-methylpyrimidine 1	0	26736	23207.7	20802	0	0	0	0	0	35877.7	0	0	23752.8	26788.1	0	0	0	19017.5	0	0	0	0	0	20187.9	37381.7	0	0	35375.1	0	19113	0	21655.8	17181.5
4-Amino-5-hydroxymethyl-2-methylpyrimidine 2	0	0	0	0	0	0	0	0	0	0	0	0	0	0	0	0	0	0	0	0	0	0	0	0	0	0	0	0	0	0	0	0	0
4-Amino-5-hydroxymethyl-2-methylpyrimidine 3	0	0	0	0	0	0	0	0	0	0	0	0	0	0	0	0	0	0	0	0	0	0	0	0	0	0	0	0	0	0	0	0	0
4-Amino-5-hydroxymethyl-2-methylpyrimidine 4	0	0	0	0	0	0	0	0	0	0	0	0	0	0	0	0	0	0	0	0	0	0	0	0	0	0	0	0	0	0	0	0	0
4-Amino-5-hydroxymethyl-2-methylpyrimidine 5	0	0	0	0	0	0	0	0	0	0	0	0	0	0	0	0	0	0	0	0	0	0	0	0	0	0	0	0	0	0	0	0	0
4-Amino-5-hydroxymethyl-2-methylpyrimidine 6	0	0	0	0	0	0	0	0	0	0	0	0	0	0	0	0	0	0	0	0	0	0	0	0	0	0	0	0	0	0	0	0	0
Group: 2
4-Amino-5-hydroxymethyl-2-methylpyrimidine C6H9N3O	blank1r	blank2r	blank3r	blank4	blank5	blank6	pooled_1	pooled_10	pooled_11	pooled_2	pooled_3	pooled_4	pooled_5	pooled_6	pooled_7	pooled_8	pooled_9	JK05	JK06	JK13	JK14	JK07	JK08	JK15	JK16	JK01	JK02	JK09	JK10	JK03	JK04	JK11	JK12
4-Amino-5-hydroxymethyl-2-methylpyrimidine 0	44035.3	307475	177454	39156.3	63244.5	162478	723324	606003	754679	642932	727132	734891	608544	719300	634707	702723	672094	78537.5	87036.5	84833.3	65195.9	5.98473e+06	6.06998e+06	5.81806e+06	6.2362e+06	89288.7	158187	105084	103895	1.9718e+06	2.67645e+06	2.67434e+06	2.3819e+06
4-Amino-5-hydroxymethyl-2-methylpyrimidine 1	0	0	0	0	0	0	0	0	0	0	0	0	0	0	0	0	0	0	0	0	0	0	0	0	0	0	0	0	0	0	0	0	0
4-Amino-5-hydroxymethyl-2-methylpyrimidine 2	0	0	0	0	0	0	0	0	0	0	0	0	0	0	0	0	0	0	0	0	0	0	0	0	0	0	0	0	0	0	0	0	0
4-Amino-5-hydroxymethyl-2-methylpyrimidine 3	0	0	0	0	0	0	0	0	0	0	0	0	0	0	0	0	0	0	0	0	0	0	0	0	0	0	0	0	0	0	0	0	0
4-Amino-5-hydroxymethyl-2-methylpyrimidine 4	0	0	0	0	0	0	0	0	0	0	0	0	0	0	0	0	0	0	0	0	0	0	0	0	0	0	0	0	0	0	0	0	0
4-Amino-5-hydroxymethyl-2-methylpyrimidine 5	0	0	0	0	0	0	0	0	0	0	0	0	0	0	0	0	0	0	0	0	0	0	0	0	0	0	0	0	0	0	0	0	0
4-Amino-5-hydroxymethyl-2-methylpyrimidine 6	0	0	0	0	0	0	0	0	0	0	0	0	0	0	0	0	0	0	0	0	0	0	0	0	0	0	0	0	0	0	0	0	0
Metabolite: 4-AMINOBUTANOATE	Formula: C4H9NO2	Mass: 103.0633
-----------------------------------------------------------------------------
Group: 1
4-Aminobutanoate C4H9NO2	blank1r	blank2r	blank3r	blank4	blank5	blank6	pooled_1	pooled_10	pooled_11	pooled_2	pooled_3	pooled_4	pooled_5	pooled_6	pooled_7	pooled_8	pooled_9	JK05	JK06	JK13	JK14	JK07	JK08	JK15	JK16	JK01	JK02	JK09	JK10	JK03	JK04	JK11	JK12
4-Aminobutanoate 0	7.21194e+06	5.75348e+06	6.24496e+06	6.40216e+06	6.31152e+06	6.46087e+06	7.12141e+06	7.33663e+06	7.40414e+06	6.81749e+06	7.26341e+06	7.17048e+06	7.00092e+06	7.21928e+06	6.81401e+06	7.15405e+06	7.56416e+06	1.53568e+07	1.17657e+07	1.69817e+07	1.52898e+07	11420018	1.34198e+07	1.49547e+07	1.46457e+07	7.8334e+06	8.15139e+06	1.03666e+07	1.10841e+07	1.36964e+07	1.23272e+07	1.45486e+07	1.32372e+07
4-Aminobutanoate 1	0	0	18074.9	44967.8	20964	0	0	0	0	0	17689.4	0	18724.3	0	27101.7	0	22793.9	0	57573.6	50050.4	109913	42140.6	77791.6	0	77415.3	0	0	0	17927.1	53735.9	0	73707.3	0
4-Aminobutanoate 2	0	0	0	0	0	0	0	0	0	0	0	0	0	0	0	0	0	0	0	0	0	0	0	0	0	0	0	0	0	0	0	0	0
4-Aminobutanoate 3	0	0	0	0	0	0	0	0	0	0	0	0	0	0	0	0	0	0	0	0	0	0	0	0	0	0	0	0	0	0	0	0	0
4-Aminobutanoate 4	0	0	0	0	0	0	0	0	0	0	0	0	0	0	0	0	0	0	0	0	0	0	0	0	0	0	0	0	0	0	0	0	0
Metabolite: 5,6-DIHYDROTHYMINE	Formula: C5H8N2O2	Mass: 128.0586
-----------------------------------------------------------------------------
Group: 1
5,6-Dihydrothymine C5H8N2O2	blank1r	blank2r	blank3r	blank4	blank5	blank6	pooled_1	pooled_10	pooled_11	pooled_2	pooled_3	pooled_4	pooled_5	pooled_6	pooled_7	pooled_8	pooled_9	JK05	JK06	JK13	JK14	JK07	JK08	JK15	JK16	JK01	JK02	JK09	JK10	JK03	JK04	JK11	JK12
5,6-Dihydrothymine 0	425645	131028	246167	196947	217798	175290	1.59472e+06	1.20662e+06	1.26642e+06	1.54623e+06	1.47791e+06	1.46878e+06	1.522e+06	1.48318e+06	1.37374e+06	1.40115e+06	1.40498e+06	3.09392e+06	2.70297e+06	3.91557e+06	2.64663e+06	2.33173e+06	3.28088e+06	3.31931e+06	3.07276e+06	3.65057e+06	4.00088e+06	4.21072e+06	4.73297e+06	2.42335e+06	3.99606e+06	4.28356e+06	5.08083e+06
5,6-Dihydrothymine 1	0	0	0	0	0	0	0	0	0	0	0	0	0	0	0	0	0	0	0	0	0	0	0	0	0	0	0	0	0	0	0	58107	0
5,6-Dihydrothymine 2	0	0	0	0	0	0	0	0	0	0	0	0	0	0	0	0	0	0	0	0	0	0	0	0	0	0	0	0	0	0	0	0	0
5,6-Dihydrothymine 3	0	0	0	0	0	0	0	0	0	0	0	0	0	0	0	0	0	0	0	0	0	0	0	0	0	0	0	0	0	0	0	0	0
5,6-Dihydrothymine 4	0	0	0	0	0	0	0	0	0	0	0	0	0	0	0	0	0	0	0	0	0	0	0	0	0	0	0	0	0	0	0	0	0
5,6-Dihydrothymine 5	0	0	0	0	0	0	0	0	0	0	0	0	0	0	0	0	0	0	0	0	0	0	0	0	0	0	0	0	0	0	0	0	0
Metabolite: ACETYLCYSTEINE	Formula: C5H9NO3S	Mass: 163.0303
-----------------------------------------------------------------------------
Group: 1
Acetylcysteine C5H9NO3S	blank1r	blank2r	blank3r	blank4	blank5	blank6	pooled_1	pooled_10	pooled_11	pooled_2	pooled_3	pooled_4	pooled_5	pooled_6	pooled_7	pooled_8	pooled_9	JK05	JK06	JK13	JK14	JK07	JK08	JK15	JK16	JK01	JK02	JK09	JK10	JK03	JK04	JK11	JK12
Acetylcysteine 0	0	0	0	0	0	0	124775	107368	97291.1	135425	96478	111330	88156.3	70795.6	116712	166005	145770	745340	872726	1.40069e+06	486218	725899	624715	914523	664654	267260	242547	382448	574297	398077	457338	518986	616692
Acetylcysteine 1	0	0	0	0	0	0	0	0	0	0	0	0	0	0	0	0	0	0	0	0	0	0	0	0	0	0	0	0	0	0	0	0	0
Acetylcysteine 2	0	0	0	0	0	0	0	0	0	0	0	0	0	0	0	0	0	0	0	0	0	38652.4	71264.4	113680	0	0	0	0	0	34781.4	27373.6	45803.4	0
Acetylcysteine 3	0	0	0	0	0	0	0	0	0	0	0	0	0	0	0	0	0	0	0	0	0	0	0	0	0	0	0	0	0	0	0	0	0
Acetylcysteine 4	0	0	0	0	0	0	0	0	0	0	0	0	0	0	0	0	0	0	0	0	0	0	0	0	0	0	0	0	0	0	0	0	0
Acetylcysteine 5	0	0	0	0	0	0	0	0	0	0	0	0	0	0	0	0	0	0	0	0	0	0	0	0	0	0	0	0	0	0	0	0	0
Metabolite: ADENINE	Formula: C5H5N5	Mass: 135.0545
-----------------------------------------------------------------------------
Group: 1
Adenine C5H5N5	blank1r	blank2r	blank3r	blank4	blank5	blank6	pooled_1	pooled_10	pooled_11	pooled_2	pooled_3	pooled_4	pooled_5	pooled_6	pooled_7	pooled_8	pooled_9	JK05	JK06	JK13	JK14	JK07	JK08	JK15	JK16	JK01	JK02	JK09	JK10	JK03	JK04	JK11	JK12
Adenine 0	0	0	0	243414	160918	137430	97233.8	266656	406047	72278.9	90987.2	110416	122715	121136	150388	230148	234216	383948	194070	307514	264744	354851	291838	107224	261345	229106	229495	168574	293836	378352	446999	488008	212026
Adenine 1	0	0	0	0	0	0	0	0	0	0	0	0	0	0	0	0	0	0	0	0	0	0	0	0	0	0	0	0	0	0	0	0	0
Adenine 2	0	0	0	0	0	0	0	0	0	0	0	0	0	0	0	0	0	0	0	0	0	0	0	0	0	0	0	0	0	0	0	0	0
Adenine 3	0	0	0	0	0	0	0	0	0	0	0	0	0	0	0	0	0	0	0	0	0	0	0	0	0	0	0	0	0	0	0	0	0
Adenine 4	0	0	0	0	0	0	0	0	0	0	0	0	0	0	0	0	0	0	0	0	0	0	0	0	0	0	0	0	0	0	0	0	0
Adenine 5	0	0	0	0	0	0	0	0	0	0	0	0	0	0	0	0	0	0	0	0	0	0	0	0	0	0	0	0	0	0	0	0	0
Group: 2
Adenine C5H5N5	blank1r	blank2r	blank3r	blank4	blank5	blank6	pooled_1	pooled_10	pooled_11	pooled_2	pooled_3	pooled_4	pooled_5	pooled_6	pooled_7	pooled_8	pooled_9	JK05	JK06	JK13	JK14	JK07	JK08	JK15	JK16	JK01	JK02	JK09	JK10	JK03	JK04	JK11	JK12
Adenine 0	0	0	44501.6	675543	660597	573770	1.0106e+06	2.33498e+06	2.4672e+06	1.15885e+06	1.18419e+06	1.17864e+06	1.22808e+06	1.31145e+06	1.39875e+06	1.80506e+06	1.86762e+06	3.31123e+06	1.7303e+06	2.79654e+06	2.77932e+06	2.88031e+06	2.4066e+06	2.52743e+06	2.37379e+06	2.51621e+06	2.43283e+06	2.95059e+06	3.26853e+06	2.93457e+06	2.77337e+06	3.37598e+06	3.18791e+06
Adenine 1	0	0	0	0	0	0	0	0	0	0	0	0	0	0	0	0	0	0	0	0	0	0	0	0	0	0	0	0	0	0	0	0	48881.4
Adenine 2	0	0	0	0	0	0	0	0	0	0	0	0	0	0	0	0	0	0	0	0	0	0	0	0	0	0	0	0	0	0	0	0	0
Adenine 3	0	0	0	0	0	0	0	0	0	0	0	0	0	0	0	0	0	0	0	0	0	0	0	0	0	0	0	0	0	0	0	0	0
Adenine 4	0	0	0	0	0	0	0	0	0	0	0	0	0	0	0	0	0	0	0	0	0	0	0	0	0	0	0	0	0	0	0	0	0
Adenine 5	0	0	0	0	0	0	0	0	0	0	0	0	0	0	0	0	0	0	0	0	0	0	0	0	0	0	0	0	0	0	0	0	0
Group: 3
Adenine C5H5N5	blank1r	blank2r	blank3r	blank4	blank5	blank6	pooled_1	pooled_10	pooled_11	pooled_2	pooled_3	pooled_4	pooled_5	pooled_6	pooled_7	pooled_8	pooled_9	JK05	JK06	JK13	JK14	JK07	JK08	JK15	JK16	JK01	JK02	JK09	JK10	JK03	JK04	JK11	JK12
Adenine 0	0	0	57864.3	402402	294483	234888	604045	1.31669e+06	851238	551453	568222	627912	644147	744002	714131	809018	978701	5.68386e+06	2.93097e+06	3.92296e+06	2.78452e+06	1.85601e+06	3.78686e+06	2.50098e+06	1.63561e+06	3.42252e+06	4.06484e+06	1.98996e+06	4.82649e+06	4.32475e+06	3.78139e+06	4.18041e+06	1.83537e+06
Adenine 1	0	0	0	0	0	0	0	0	0	0	0	0	0	0	0	0	0	234962	0	0	0	0	0	0	0	0	0	0	0	0	0	0	0
Adenine 2	0	0	0	0	0	0	0	0	0	0	0	0	0	0	0	0	0	0	0	0	0	0	0	0	0	0	0	0	0	0	0	0	0
Adenine 3	0	0	0	0	0	0	0	0	0	0	0	0	0	0	0	0	0	0	0	0	0	0	0	0	0	0	0	0	0	0	0	0	0
Adenine 4	0	0	0	0	0	0	0	0	0	0	0	0	0	0	0	0	0	0	0	0	0	0	0	0	0	0	0	0	0	0	0	0	0
Adenine 5	0	0	0	0	0	0	0	0	0	0	0	0	0	0	0	0	0	0	0	0	0	0	0	0	0	0	0	0	0	0	0	0	0
Group: 4
Adenine C5H5N5	blank1r	blank2r	blank3r	blank4	blank5	blank6	pooled_1	pooled_10	pooled_11	pooled_2	pooled_3	pooled_4	pooled_5	pooled_6	pooled_7	pooled_8	pooled_9	JK05	JK06	JK13	JK14	JK07	JK08	JK15	JK16	JK01	JK02	JK09	JK10	JK03	JK04	JK11	JK12
Adenine 0	0	60053.8	128338	1.41955e+06	1.34251e+06	1.2619e+06	2.41816e+06	3.6114e+06	3.74509e+06	2.41301e+06	2.68992e+06	2.53743e+06	2.66989e+06	2.79141e+06	2.78179e+06	3.17876e+06	3.32711e+06	4.02264e+07	4.68578e+06	1.13139e+07	7.73266e+06	6.49926e+06	9.11202e+06	5.6871e+06	6.60336e+06	4.62895e+06	3.63736e+06	2.95184e+06	4.67569e+06	7.57e+06	6.57713e+06	8.3739e+06	4.4644e+06
Adenine 1	0	0	0	0	0	0	23048.5	20903.3	60594.2	21465	18210.7	34275.4	0	48065.2	19781.1	32084.2	42724.1	1.86531e+06	91781.3	383470	194309	139868	327846	124818	192014	102392	61218.3	23593.4	80926.2	239540	192820	187068	54832.7
Adenine 2	0	0	0	0	0	0	0	0	0	0	0	0	0	0	0	0	0	0	0	0	0	0	0	0	0	0	0	0	0	0	0	0	0
Adenine 3	0	0	0	0	0	0	0	0	0	0	0	0	0	0	0	0	0	0	0	0	0	0	0	0	0	0	0	0	0	0	0	0	0
Adenine 4	0	0	0	0	0	0	0	0	0	0	0	0	0	0	0	0	0	0	0	0	0	0	0	0	0	0	0	0	0	0	0	0	0
Adenine 5	0	0	0	0	0	0	0	0	0	0	0	0	0	0	0	0	0	0	0	0	0	0	0	0	0	0	0	0	0	0	0	0	0
Group: 5
Adenine C5H5N5	blank1r	blank2r	blank3r	blank4	blank5	blank6	pooled_1	pooled_10	pooled_11	pooled_2	pooled_3	pooled_4	pooled_5	pooled_6	pooled_7	pooled_8	pooled_9	JK05	JK06	JK13	JK14	JK07	JK08	JK15	JK16	JK01	JK02	JK09	JK10	JK03	JK04	JK11	JK12
Adenine 0	0	0	52781.5	649171	584670	565973	887292	1.23656e+06	1.24263e+06	838785	923511	834410	937978	870019	968456	1.06176e+06	1.11144e+06	8.04111e+06	1.74384e+06	3.71582e+06	3.06794e+06	2.56854e+06	2.9341e+06	2.28436e+06	2.87803e+06	1.21706e+06	1.10408e+06	1.07553e+06	1.47347e+06	1.95786e+06	1.67709e+06	1.96498e+06	1.46672e+06
Adenine 1	0	0	0	0	0	0	0	0	0	0	0	0	0	0	0	0	0	295715	19141.4	33177.9	35711.4	19691.6	34429	41237.3	50211.5	0	0	0	0	0	0	0	0
Adenine 2	0	0	0	0	0	0	0	0	0	0	0	0	0	0	0	0	0	0	0	0	0	0	0	0	0	0	0	0	0	0	0	0	0
Adenine 3	0	0	0	0	0	0	0	0	0	0	0	0	0	0	0	0	0	0	0	0	0	0	0	0	0	0	0	0	0	0	0	0	0
Adenine 4	0	0	0	0	0	0	0	0	0	0	0	0	0	0	0	0	0	0	0	0	0	0	0	0	0	0	0	0	0	0	0	0	0
Adenine 5	0	0	0	0	0	0	0	0	0	0	0	0	0	0	0	0	0	0	0	0	0	0	0	0	0	0	0	0	0	0	0	0	0
Metabolite: ADENOSINE	Formula: C10H13N5O4	Mass: 267.0968
-----------------------------------------------------------------------------
Group: 1
Adenosine C10H13N5O4	blank1r	blank2r	blank3r	blank4	blank5	blank6	pooled_1	pooled_10	pooled_11	pooled_2	pooled_3	pooled_4	pooled_5	pooled_6	pooled_7	pooled_8	pooled_9	JK05	JK06	JK13	JK14	JK07	JK08	JK15	JK16	JK01	JK02	JK09	JK10	JK03	JK04	JK11	JK12
Adenosine 0	0	0	0	0	0	0	51699.6	66290.6	75927.3	34005.8	78403.1	71828.1	77740.7	90081.5	72621.8	71783.8	82952.3	1.27351e+06	213645	645129	545210	180130	280176	167326	282834	56848.2	0	68689.4	48271.3	128195	89292.7	129870	107565
Adenosine 1	0	0	0	0	0	0	0	0	0	0	0	0	0	0	0	0	0	37444.1	0	0	0	0	0	0	0	0	0	0	0	0	0	0	0
Adenosine 2	0	0	0	0	0	0	0	0	0	0	0	0	0	0	0	0	0	0	0	0	0	0	0	0	0	0	0	0	0	0	0	0	0
Adenosine 3	0	0	0	0	0	0	0	0	0	0	0	0	0	0	0	0	0	0	0	0	0	0	0	0	0	0	0	0	0	0	0	0	0
Adenosine 4	73144.9	0	0	0	0	0	0	0	0	0	0	0	0	0	0	0	0	0	0	0	0	0	0	0	0	0	0	0	0	0	0	0	0
Adenosine 5	0	0	0	0	0	0	0	0	0	0	0	0	0	0	0	0	0	0	0	0	0	0	31628.9	56785.8	61665.9	0	0	0	0	0	0	0	0
Adenosine 6	0	0	0	0	0	0	0	0	0	0	0	0	0	0	0	0	0	0	0	0	0	0	0	0	0	0	0	0	0	0	0	0	0
Adenosine 7	0	0	0	0	0	0	0	0	0	0	0	0	0	0	0	0	0	0	0	0	0	0	0	0	0	0	0	0	0	0	0	0	0
Adenosine 8	0	0	0	0	0	0	0	0	0	0	0	0	0	0	0	0	0	0	0	0	0	0	0	0	0	0	0	0	0	0	0	0	0
Adenosine 9	0	0	0	0	0	0	0	0	0	0	0	0	0	0	0	0	0	0	0	0	0	0	0	0	0	0	0	0	0	0	0	0	0
Adenosine 10	0	0	0	0	0	0	0	0	0	0	0	0	0	0	0	0	0	0	0	0	0	0	0	0	0	0	0	0	0	0	0	0	0
Metabolite: ADP	Formula: C10H15N5O10P2	Mass: 427.0294
-----------------------------------------------------------------------------
Group: 1
ADP C10H15N5O10P2	blank1r	blank2r	blank3r	blank4	blank5	blank6	pooled_1	pooled_10	pooled_11	pooled_2	pooled_3	pooled_4	pooled_5	pooled_6	pooled_7	pooled_8	pooled_9	JK05	JK06	JK13	JK14	JK07	JK08	JK15	JK16	JK01	JK02	JK09	JK10	JK03	JK04	JK11	JK12
ADP 0	0	0	0	0	0	0	908331	1.00873e+06	633553	1.02607e+06	988874	1.09e+06	1.04731e+06	1.00611e+06	1.08386e+06	967227	940697	1.99598e+06	4.1384e+06	5.04529e+06	4.99745e+06	2.51514e+06	2.19818e+06	2.86498e+06	2.78467e+06	3.26212e+06	2.73532e+06	5.00595e+06	3.24176e+06	5.44776e+06	5.46959e+06	5.17389e+06	4.87666e+06
ADP 1	0	0	0	0	0	0	36104.5	0	0	0	36085.1	0	0	26853.1	40146.6	0	0	51170.6	206359	419700	309611	191513	106573	125587	150115	99204.5	162493	300899	178761	507822	357573	450261	321083
ADP 2	0	0	0	0	0	0	0	0	0	0	0	0	0	0	0	0	0	0	0	0	0	121373	86604.7	169040	100981	0	0	0	0	64494.3	0	0	0
ADP 3	0	0	0	0	0	0	0	0	0	0	0	0	0	0	0	0	0	0	0	0	0	0	0	116554	185797	0	0	0	0	0	0	0	0
ADP 4	0	0	0	0	0	0	0	0	0	0	0	0	0	0	0	0	0	0	0	0	0	0	0	0	0	0	0	0	0	0	0	0	0
ADP 5	0	0	0	0	0	0	0	0	0	0	0	0	0	0	0	0	0	0	0	0	0	663120	575952	1.45256e+06	1.51677e+06	0	0	0	0	0	0	0	0
ADP 6	0	0	0	0	0	0	0	0	0	0	0	0	0	0	0	0	0	0	0	0	0	0	0	0	0	0	0	0	0	0	0	0	0
ADP 7	0	0	0	0	0	0	0	0	0	0	0	0	0	0	0	0	0	0	0	0	0	0	0	0	0	0	0	0	0	0	0	0	0
ADP 8	0	0	0	0	0	0	0	0	0	0	0	0	0	0	0	0	0	0	0	0	0	0	0	0	0	0	0	0	0	0	0	0	0
ADP 9	0	0	0	0	0	0	0	0	0	0	0	0	0	0	0	0	0	0	0	0	0	0	0	0	0	0	0	0	0	0	0	0	0
ADP 10	0	0	0	0	0	0	0	0	0	0	0	0	0	0	0	0	0	0	0	0	0	0	0	0	0	0	0	0	0	0	0	0	0
Group: 2
ADP C10H15N5O10P2	blank1r	blank2r	blank3r	blank4	blank5	blank6	pooled_1	pooled_10	pooled_11	pooled_2	pooled_3	pooled_4	pooled_5	pooled_6	pooled_7	pooled_8	pooled_9	JK05	JK06	JK13	JK14	JK07	JK08	JK15	JK16	JK01	JK02	JK09	JK10	JK03	JK04	JK11	JK12
ADP 0	0	0	0	0	0	0	6.58924e+06	6.07301e+06	6.0802e+06	6.4543e+06	6.46587e+06	6.62817e+06	6.52692e+06	6.69334e+06	6.62347e+06	6.2978e+06	6.19353e+06	3.08817e+07	1.68744e+07	3.00517e+07	2.17153e+07	1.36057e+07	1.34506e+07	1.0621e+07	1.39894e+07	1.61536e+07	1.17312e+07	1.36437e+07	1.6877e+07	2.92018e+07	3.43701e+07	3.31321e+07	2.90518e+07
ADP 1	0	0	0	0	0	0	651558	578661	560536	539080	611135	476895	603223	544183	689746	552205	578867	3.01959e+06	1.72357e+06	2.97648e+06	2.35336e+06	1.28939e+06	1.25049e+06	987437	1.20939e+06	1.68175e+06	1.13562e+06	1.20061e+06	1.43667e+06	2.74933e+06	3.49155e+06	3.40678e+06	3.01798e+06
ADP 2	0	0	0	0	0	0	107911	136456	70933.9	149966	81790.6	125595	83762.2	126045	156595	145599	136609	0	0	0	0	1.16984e+06	1.23398e+06	1.02889e+06	1.33976e+06	0	0	0	0	1.25538e+06	1.11873e+06	1.50041e+06	1.05598e+06
ADP 3	0	0	0	0	0	0	64236.4	74232	75243.9	65654.3	59985.8	55622.7	43583.2	100835	128464	110071	116461	0	0	0	0	1.30311e+06	1.35486e+06	990347	1.57237e+06	0	0	0	0	823645	1.00368e+06	938676	932917
ADP 4	0	0	0	0	0	0	0	0	0	0	0	0	0	0	0	0	0	0	0	0	0	0	67388.8	96546.6	179153	0	0	0	0	0	0	0	0
ADP 5	0	0	0	0	0	0	246907	220742	280226	226819	225580	259024	263979	228195	246629	254260	274822	0	0	0	0	4.18173e+06	3.66876e+06	5.62352e+06	6.13563e+06	0	0	0	0	152676	204649	144161	94648
ADP 6	0	0	0	0	0	0	0	0	0	0	0	0	0	0	0	0	0	0	0	0	0	125339	0	135156	168594	0	0	0	0	0	0	0	0
ADP 7	0	0	0	0	0	0	0	0	0	0	0	0	0	0	0	0	0	0	0	0	0	0	0	0	0	0	0	0	0	0	0	0	0
ADP 8	0	0	0	0	0	0	0	0	0	0	0	0	0	0	0	0	0	0	0	0	0	0	0	0	0	0	0	0	0	0	0	0	0
ADP 9	0	0	0	0	0	0	0	0	0	0	0	0	0	0	0	0	0	0	0	0	0	0	0	0	0	0	0	0	0	0	0	0	0
ADP 10	0	0	0	0	0	0	0	0	0	0	0	0	0	0	0	0	0	0	0	0	0	0	0	0	0	0	0	0	0	0	0	0	0
Metabolite: ALLANTOIN	Formula: C4H6N4O3	Mass: 158.044
-----------------------------------------------------------------------------
Group: 1
Allantoin C4H6N4O3	blank1r	blank2r	blank3r	blank4	blank5	blank6	pooled_1	pooled_10	pooled_11	pooled_2	pooled_3	pooled_4	pooled_5	pooled_6	pooled_7	pooled_8	pooled_9	JK05	JK06	JK13	JK14	JK07	JK08	JK15	JK16	JK01	JK02	JK09	JK10	JK03	JK04	JK11	JK12
Allantoin 0	0	0	0	0	0	0	585605	425071	553344	586053	549633	485194	520211	537599	478918	459367	588634	1.29065e+06	909047	1.18885e+06	885736	1.01284e+06	1.03766e+06	1.26902e+06	888851	898818	1.11437e+06	1.07905e+06	1.24716e+06	957974	1.25307e+06	1.39368e+06	1.06736e+06
Allantoin 1	0	0	0	0	0	0	0	0	0	0	0	0	0	0	0	0	0	0	0	0	0	0	0	0	0	0	0	0	0	0	0	0	0
Allantoin 2	0	0	0	0	0	0	0	0	0	0	0	0	0	0	0	0	0	0	0	0	0	0	0	0	0	0	0	0	0	0	0	0	0
Allantoin 3	0	0	0	0	0	0	0	0	0	0	0	0	0	0	0	0	0	0	0	0	0	0	0	0	0	0	0	0	0	0	0	0	0
Allantoin 4	0	0	0	0	0	0	0	0	0	0	0	0	0	0	0	0	0	0	0	0	0	0	0	0	0	0	0	0	0	0	0	0	0
Metabolite: ALLOPURINOL	Formula: C5H4N4O	Mass: 136.0385
-----------------------------------------------------------------------------
Group: 1
allopurinol C5H4N4O	blank1r	blank2r	blank3r	blank4	blank5	blank6	pooled_1	pooled_10	pooled_11	pooled_2	pooled_3	pooled_4	pooled_5	pooled_6	pooled_7	pooled_8	pooled_9	JK05	JK06	JK13	JK14	JK07	JK08	JK15	JK16	JK01	JK02	JK09	JK10	JK03	JK04	JK11	JK12
allopurinol 0	0	0	0	0	0	0	1.3785e+07	1.34015e+07	1.34022e+07	1.36253e+07	1.35067e+07	1.35459e+07	1.37829e+07	1.35233e+07	1.32213e+07	1.37133e+07	1.33201e+07	3.40851e+07	5.71531e+07	6.11147e+07	2.47924e+07	3.3277e+07	3.61587e+07	5.41087e+07	3.43285e+07	2.70678e+07	1.56568e+07	1.77649e+07	2.67957e+07	2.10618e+07	2.74558e+07	2.37053e+07	2.2437e+07
allopurinol 1	0	0	0	0	0	0	623165	625916	623872	668634	707225	727496	602690	680998	658220	604589	572630	1.78092e+06	2.96143e+06	3.06873e+06	1.2627e+06	1.62992e+06	1.79756e+06	2.88017e+06	1.86316e+06	1.20686e+06	736487	771450	1.31977e+06	878798	1.37485e+06	1.05904e+06	1.05822e+06
allopurinol 2	0	0	0	0	0	0	0	0	0	0	0	0	0	0	0	0	0	0	0	0	0	0	0	0	0	0	0	0	0	0	0	0	0
allopurinol 3	0	0	0	0	0	0	0	0	0	0	0	0	0	0	0	0	0	0	0	0	0	0	0	0	0	0	0	0	0	0	0	0	0
allopurinol 4	0	0	0	0	0	0	0	0	0	0	0	0	0	0	0	0	0	0	0	0	0	0	0	0	0	0	0	0	0	0	0	0	0
allopurinol 5	0	0	0	0	0	0	0	0	0	0	0	0	0	0	0	0	0	0	0	0	0	0	0	0	0	0	0	0	0	0	0	0	0
Metabolite: ALPHA-D-GLUCOSAMINE 1-PHOSPHATE	Formula: C6H14NO8P	Mass: 259.0457
-----------------------------------------------------------------------------
Group: 1
alpha-D-Glucosamine 1-phosphate C6H14NO8P	blank1r	blank2r	blank3r	blank4	blank5	blank6	pooled_1	pooled_10	pooled_11	pooled_2	pooled_3	pooled_4	pooled_5	pooled_6	pooled_7	pooled_8	pooled_9	JK05	JK06	JK13	JK14	JK07	JK08	JK15	JK16	JK01	JK02	JK09	JK10	JK03	JK04	JK11	JK12
alpha-D-Glucosamine 1-phosphate 0	0	0	0	0	0	0	4.86036e+06	4.16894e+06	4.49191e+06	4.74981e+06	4.55139e+06	4.50051e+06	4.42014e+06	4.66478e+06	4.70055e+06	4.19243e+06	4.44119e+06	1.52131e+07	1.12644e+07	2.17571e+07	1.58528e+07	7.18779e+06	8.4309e+06	8.45566e+06	9.56262e+06	1.85964e+07	1.94366e+07	2.49974e+07	2.72809e+07	1.52595e+07	1.66362e+07	1.89577e+07	2.06564e+07
alpha-D-Glucosamine 1-phosphate 1	0	0	0	0	0	0	188404	139413	136865	138887	166214	73120.4	131919	143550	100483	81824.6	84768.3	823430	187980	606409	684567	0	139950	96522.3	221329	833463	963788	1.09357e+06	1.2312e+06	567139	376044	861514	932674
alpha-D-Glucosamine 1-phosphate 2	0	0	0	0	0	0	0	0	0	0	0	0	0	0	0	0	0	0	0	0	0	0	0	0	0	0	0	0	0	0	0	0	0
alpha-D-Glucosamine 1-phosphate 3	0	0	0	0	0	0	658693	445647	542317	620456	481125	537188	502238	595597	568969	402450	502510	0	0	0	0	4.21798e+06	5.57866e+06	6.39616e+06	6.76795e+06	0	0	0	0	4.03537e+06	4.80941e+06	5.7788e+06	5.84163e+06
alpha-D-Glucosamine 1-phosphate 4	0	0	0	0	0	0	0	0	0	0	0	0	0	0	0	0	0	0	0	0	0	0	0	0	0	0	0	0	0	0	0	0	0
alpha-D-Glucosamine 1-phosphate 5	0	0	0	0	0	0	0	0	0	0	0	0	0	0	0	0	0	0	0	0	0	0	0	0	0	0	0	0	0	0	0	0	0
alpha-D-Glucosamine 1-phosphate 6	0	0	0	0	0	0	0	0	0	0	0	0	0	0	0	0	0	0	0	0	0	0	0	0	49017.2	0	0	0	0	0	0	0	0
Metabolite: AMP	Formula: C10H14N5O7P	Mass: 347.0631
-----------------------------------------------------------------------------
Group: 1
AMP C10H14N5O7P	blank1r	blank2r	blank3r	blank4	blank5	blank6	pooled_1	pooled_10	pooled_11	pooled_2	pooled_3	pooled_4	pooled_5	pooled_6	pooled_7	pooled_8	pooled_9	JK05	JK06	JK13	JK14	JK07	JK08	JK15	JK16	JK01	JK02	JK09	JK10	JK03	JK04	JK11	JK12
AMP 0	0	0	0	0	0	0	3.70171e+06	3.73907e+06	3.50498e+06	3.80241e+06	3.6249e+06	3.67586e+06	3.61162e+06	3.69732e+06	3.70915e+06	3.75737e+06	3.73063e+06	4.76949e+07	6.16026e+06	1.33122e+07	7.95133e+06	8.61121e+06	1.09674e+07	3.0501e+06	5.82821e+06	5.83757e+06	4.6178e+06	4.23759e+06	6.00095e+06	1.4702e+07	1.69454e+07	1.75419e+07	1.33432e+07
AMP 1	0	0	0	0	0	0	261061	312531	333337	308767	258670	278947	241675	370601	305953	276769	345246	4.97836e+06	578625	1.28891e+06	801690	765568	1.11771e+06	217630	504916	457192	399478	348998	603623	1.41927e+06	1.60677e+06	1.68956e+06	1.2557e+06
AMP 2	0	0	0	0	0	0	25016.8	28259.2	0	49026.3	24852.1	37932.5	0	0	16126	28440.4	23850.5	0	0	0	0	707206	843498	183756	404249	0	0	0	0	462093	462495	528189	439638
AMP 3	0	0	0	0	0	0	0	29598	38658.5	27135	21592.9	21093.5	27071.3	22355.5	0	16924.7	23711.7	0	0	0	0	863710	998439	258629	553965	0	0	0	0	379729	437354	507450	268568
AMP 4	0	0	0	0	0	0	0	0	0	0	0	0	0	0	0	0	0	0	0	0	0	62181.9	95857.8	0	27245.9	0	0	0	0	0	0	0	0
AMP 5	0	0	0	0	0	0	101128	146138	108928	119194	116428	108718	132464	121776	87795.7	111420	119747	0	0	0	0	3.06039e+06	3.41084e+06	1.54784e+06	2.75362e+06	0	0	0	0	76976.5	115933	101557	48985.4
AMP 6	0	0	0	0	0	0	0	0	0	0	0	0	0	0	0	0	0	0	0	0	0	50821.6	97255.4	0	24827.6	0	0	0	0	0	0	0	0
AMP 7	0	0	0	0	0	0	0	0	0	0	0	0	0	0	0	0	0	0	0	0	0	0	0	0	0	0	0	0	0	0	0	0	0
AMP 8	0	0	0	0	0	0	0	0	0	0	0	0	0	0	0	0	0	0	0	0	0	0	0	0	0	0	0	0	0	0	0	0	0
AMP 9	0	0	0	0	0	0	0	0	0	0	0	0	0	0	0	0	0	0	0	0	0	0	0	0	0	0	0	0	0	0	0	0	0
AMP 10	0	0	0	0	0	0	0	0	0	0	0	0	0	0	0	0	0	0	0	0	0	0	0	0	0	0	0	0	0	0	0	0	0
Metabolite: ATP	Formula: C10H16N5O13P3	Mass: 506.9957
-----------------------------------------------------------------------------
Group: 1
ATP C10H16N5O13P3	blank1r	blank2r	blank3r	blank4	blank5	blank6	pooled_1	pooled_10	pooled_11	pooled_2	pooled_3	pooled_4	pooled_5	pooled_6	pooled_7	pooled_8	pooled_9	JK05	JK06	JK13	JK14	JK07	JK08	JK15	JK16	JK01	JK02	JK09	JK10	JK03	JK04	JK11	JK12
ATP 0	0	0	0	0	0	0	1.26625e+07	1.03222e+07	7.62672e+06	1.17226e+07	1.1507e+07	1.13719e+07	1.18352e+07	1.16291e+07	1.19482e+07	1.10589e+07	1.07735e+07	1.90871e+07	4.48795e+07	5.61238e+07	5.03224e+07	2.54134e+07	2.4137e+07	3.02284e+07	2.91007e+07	3.99134e+07	2.99544e+07	4.7195e+07	3.43711e+07	5.38237e+07	5.76363e+07	4.86411e+07	5.25229e+07
ATP 1	0	0	0	0	0	0	1.36439e+06	1.11653e+06	735287	1.2541e+06	1.31961e+06	1.34609e+06	1.25534e+06	1.22433e+06	1.34267e+06	1.25097e+06	1.20595e+06	2.20633e+06	5.22464e+06	6.3136e+06	5.5968e+06	2.92035e+06	2.71104e+06	3.46171e+06	3.20991e+06	4.45031e+06	3.33079e+06	5.43939e+06	3.89182e+06	6.08006e+06	6.70456e+06	5.57198e+06	6.08454e+06
ATP 2	0	0	0	0	0	0	417833	177003	173363	456430	383952	320567	335052	235384	483501	193395	325845	0	233900	0	0	2.6413e+06	2.47836e+06	3.29041e+06	2.96793e+06	336916	0	253707	107105	3.20139e+06	3.09324e+06	2.72858e+06	2.88981e+06
ATP 3	0	0	0	0	0	0	265990	174732	132981	275609	209786	243270	220723	250975	250311	185895	209966	0	0	0	0	2.64461e+06	2.4121e+06	3.3026e+06	3.42321e+06	0	0	0	0	1.88462e+06	2.05379e+06	1.52355e+06	1.50791e+06
ATP 4	0	0	0	0	0	0	0	0	0	0	0	0	0	0	0	0	0	0	0	0	0	297324	172890	556163	433764	0	0	0	0	0	0	0	0
ATP 5	0	0	0	0	0	0	672732	507541	358378	634777	621529	620493	623703	605945	664509	625770	547927	0	0	0	0	7.9525e+06	6.60198e+06	1.57797e+07	1.40289e+07	0	0	0	0	702068	592543	625290	519497
ATP 6	0	0	0	0	0	0	0	0	0	0	0	0	0	0	0	0	0	0	0	0	0	309256	178371	696537	586442	0	0	0	0	0	0	0	0
ATP 7	0	0	0	0	0	0	0	0	0	0	0	0	0	0	0	0	0	0	0	0	0	0	0	0	0	0	0	0	0	0	0	0	0
ATP 8	0	0	0	0	0	0	0	0	0	0	0	0	0	0	0	0	0	0	0	0	0	0	0	0	0	0	0	0	0	0	0	0	0
ATP 9	0	0	0	0	0	0	0	0	0	0	0	0	0	0	0	0	0	0	0	0	0	0	0	0	0	0	0	0	0	0	0	0	0
ATP 10	0	0	0	0	0	0	0	0	0	0	0	0	0	0	0	0	0	0	0	0	0	0	0	0	0	0	0	0	0	0	0	0	0
Metabolite: BATHOCUPROINE DISULFONIC ACID	Formula: C26H20N2O6S2	Mass: 520.0763
-----------------------------------------------------------------------------
Group: 1
Bathocuproine disulfonic acid C26H20N2O6S2	blank1r	blank2r	blank3r	blank4	blank5	blank6	pooled_1	pooled_10	pooled_11	pooled_2	pooled_3	pooled_4	pooled_5	pooled_6	pooled_7	pooled_8	pooled_9	JK05	JK06	JK13	JK14	JK07	JK08	JK15	JK16	JK01	JK02	JK09	JK10	JK03	JK04	JK11	JK12
Bathocuproine disulfonic acid 0	0	0	0	0	0	0	2.09196e+06	2.90643e+06	2.8981e+06	2.1163e+06	1.97978e+06	2.21144e+06	2.15229e+06	2.61924e+06	2.27409e+06	2.34836e+06	2.2998e+06	1.67212e+07	9.49955e+06	1.74004e+07	1.15386e+07	7.74654e+06	7.60791e+06	1.5433e+07	8.98749e+06	3.99029e+06	3.01256e+06	4.22127e+06	4.50614e+06	4.96916e+06	9.04367e+06	4.4501e+06	4.33031e+06
Bathocuproine disulfonic acid 1	0	0	0	0	0	0	528470	811190	704402	516847	587315	514872	710729	771924	620152	679131	810984	4.84157e+06	2.3514e+06	5.06243e+06	3.51739e+06	2.2489e+06	2.00649e+06	4.40581e+06	2.72694e+06	1.22644e+06	778355	1.0157e+06	1.2785e+06	1.34606e+06	2.68368e+06	1.22855e+06	1.25794e+06
Bathocuproine disulfonic acid 2	0	0	0	0	0	0	0	0	0	0	0	0	0	0	0	0	0	0	0	0	0	0	0	0	0	0	0	0	0	0	0	0	0
Bathocuproine disulfonic acid 3	0	0	0	0	0	0	0	0	0	0	0	0	0	0	0	0	0	0	0	0	0	0	0	0	0	0	0	0	0	0	0	0	0
Bathocuproine disulfonic acid 4	0	0	0	0	0	0	0	0	0	0	0	0	0	0	0	0	0	0	0	0	0	0	0	0	0	0	0	0	0	0	0	0	0
Bathocuproine disulfonic acid 5	0	0	0	0	0	0	0	0	0	0	0	0	0	0	0	0	0	0	0	0	0	0	0	0	0	0	0	0	0	0	0	0	0
Bathocuproine disulfonic acid 6	0	0	0	0	0	0	0	0	0	0	0	0	0	0	0	0	0	0	0	0	0	0	0	0	0	0	0	0	0	0	0	0	0
Bathocuproine disulfonic acid 7	0	0	0	0	0	0	0	0	0	0	0	0	0	0	0	0	0	0	0	0	0	0	0	0	0	0	0	0	0	0	0	0	0
Bathocuproine disulfonic acid 8	0	0	0	0	0	0	0	0	0	0	0	0	0	0	0	0	0	0	0	0	0	0	0	0	0	0	0	0	0	0	0	0	0
Bathocuproine disulfonic acid 9	0	0	0	0	0	0	0	0	0	0	0	0	0	0	0	0	0	0	0	0	0	0	0	0	0	0	0	0	0	0	0	0	0
Bathocuproine disulfonic acid 10	0	0	0	0	0	0	0	0	0	0	0	0	0	0	0	0	0	0	0	0	0	0	0	0	0	0	0	0	0	0	0	0	0
Bathocuproine disulfonic acid 11	0	0	0	0	0	0	0	0	0	0	0	0	0	0	0	0	0	0	0	0	0	0	0	0	0	0	0	0	0	0	0	0	0
Bathocuproine disulfonic acid 12	0	0	0	0	0	0	0	0	0	0	0	0	0	0	0	0	0	0	0	0	0	0	0	0	0	0	0	0	0	0	0	0	0
Bathocuproine disulfonic acid 13	0	0	0	0	0	0	0	0	0	0	0	0	0	0	0	0	0	0	0	0	0	0	0	0	0	0	0	0	0	0	0	0	0
Bathocuproine disulfonic acid 14	0	0	0	0	0	0	0	0	0	0	0	0	0	0	0	0	0	0	0	0	0	0	0	0	0	0	0	0	0	0	0	0	0
Bathocuproine disulfonic acid 15	0	0	0	0	0	0	0	0	0	0	0	0	0	0	0	0	0	0	0	0	0	0	0	0	0	0	0	0	0	0	0	0	0
Bathocuproine disulfonic acid 16	0	0	0	0	0	0	0	0	0	0	0	0	0	0	0	0	0	0	0	0	0	0	0	0	0	0	0	0	0	0	0	0	0
Bathocuproine disulfonic acid 17	0	0	0	0	0	0	0	0	0	0	0	0	0	0	0	0	0	0	0	0	0	0	0	0	0	0	0	0	0	0	0	0	0
Bathocuproine disulfonic acid 18	0	0	0	0	0	0	0	0	0	0	0	0	0	0	0	0	0	0	0	0	0	0	0	0	0	0	0	0	0	0	0	0	0
Bathocuproine disulfonic acid 19	0	0	0	0	0	0	0	0	0	0	0	0	0	0	0	0	0	0	0	0	0	0	0	0	0	0	0	0	0	0	0	0	0
Bathocuproine disulfonic acid 20	0	0	0	0	0	0	0	0	0	0	0	0	0	0	0	0	0	0	0	0	0	0	0	0	0	0	0	0	0	0	0	0	0
Bathocuproine disulfonic acid 21	0	0	0	0	0	0	0	0	0	0	0	0	0	0	0	0	0	0	0	0	0	0	0	0	0	0	0	0	0	0	0	0	0
Bathocuproine disulfonic acid 22	0	0	0	0	0	0	0	0	0	0	0	0	0	0	0	0	0	0	0	0	0	0	0	0	0	0	0	0	0	0	0	0	0
Bathocuproine disulfonic acid 23	0	0	0	0	0	0	0	0	0	0	0	0	0	0	0	0	0	0	0	0	0	0	0	0	0	0	0	0	0	0	0	0	0
Bathocuproine disulfonic acid 24	0	0	0	0	0	0	0	0	0	0	0	0	0	0	0	0	0	0	0	0	0	0	0	0	0	0	0	0	0	0	0	0	0
Bathocuproine disulfonic acid 25	0	0	0	0	0	0	0	0	0	0	0	0	0	0	0	0	0	0	0	0	0	0	0	0	0	0	0	0	0	0	0	0	0
Bathocuproine disulfonic acid 26	0	0	0	0	0	0	0	0	0	0	0	0	0	0	0	0	0	0	0	0	0	0	0	0	0	0	0	0	0	0	0	0	0
Metabolite: BETAINE	Formula: C5H11NO2	Mass: 117.079
-----------------------------------------------------------------------------
Group: 1
Betaine C5H11NO2	blank1r	blank2r	blank3r	blank4	blank5	blank6	pooled_1	pooled_10	pooled_11	pooled_2	pooled_3	pooled_4	pooled_5	pooled_6	pooled_7	pooled_8	pooled_9	JK05	JK06	JK13	JK14	JK07	JK08	JK15	JK16	JK01	JK02	JK09	JK10	JK03	JK04	JK11	JK12
Betaine 0	0	139118	63273.8	589615	544131	428677	1.69647e+07	2.07611e+07	2.23817e+07	1.69385e+07	1.71024e+07	1.68131e+07	1.7245e+07	1.73053e+07	1.76483e+07	1.89577e+07	1.95018e+07	5.04872e+07	5.33867e+07	7.15667e+07	3.66187e+07	4.55334e+07	4.41268e+07	5.51146e+07	5.03642e+07	7.22184e+07	7.19907e+07	7.21781e+07	7.95075e+07	4.51575e+07	5.89787e+07	6.63175e+07	6.15971e+07
Betaine 1	0	0	0	0	0	0	869413	1.07364e+06	1.19165e+06	868947	748474	906432	800985	900186	891859	982211	986214	2.75631e+06	2.87195e+06	3.90066e+06	1.92376e+06	2.43813e+06	2.42962e+06	2.88967e+06	2.71743e+06	3.89249e+06	3.95581e+06	3.78539e+06	4.22165e+06	2.52502e+06	3.13808e+06	3.58846e+06	3.24275e+06
Betaine 2	0	0	0	0	0	0	0	0	0	0	0	0	0	0	0	0	0	0	0	0	0	0	0	0	0	0	0	0	18669.8	0	0	19801.5	0
Betaine 3	0	0	0	0	0	0	0	0	0	0	0	0	0	0	0	0	0	0	0	0	0	0	0	0	0	0	0	0	0	0	0	0	0
Betaine 4	0	0	0	0	0	0	0	0	0	0	0	0	0	0	0	0	0	0	0	0	0	0	0	0	0	0	0	0	0	0	0	0	0
Betaine 5	0	0	0	0	0	0	0	0	0	0	0	0	0	0	0	0	0	0	0	0	0	0	0	0	0	0	0	0	0	0	0	0	0
Group: 2
Betaine C5H11NO2	blank1r	blank2r	blank3r	blank4	blank5	blank6	pooled_1	pooled_10	pooled_11	pooled_2	pooled_3	pooled_4	pooled_5	pooled_6	pooled_7	pooled_8	pooled_9	JK05	JK06	JK13	JK14	JK07	JK08	JK15	JK16	JK01	JK02	JK09	JK10	JK03	JK04	JK11	JK12
Betaine 0	276787	157641	175000	1.02434e+06	784550	663729	1.99134e+06	3.13184e+06	3.5482e+06	2.20313e+06	2.03868e+06	2.20676e+06	2.00021e+06	2.10459e+06	2.8992e+06	3.25287e+06	2.90681e+06	7.88252e+06	5.4366e+06	6.46671e+06	5.78607e+06	5.82018e+06	6.22831e+06	5.46986e+06	5.5152e+06	5.90179e+06	6.32092e+06	6.81937e+06	6.84842e+06	5.72133e+06	6.68064e+06	5.70557e+06	5.26365e+06
Betaine 1	0	0	0	0	0	0	44366.8	34275.9	58481.9	17894.9	29131	0	37458.8	28224.5	39249	32527.8	24572.8	270280	115529	179163	152455	176803	210848	167382	179433	142189	221923	255357	194136	236429	182544	143361	127180
Betaine 2	0	0	0	0	0	0	0	0	0	0	0	0	0	0	0	0	0	0	0	0	0	0	0	0	0	0	0	0	0	0	0	0	0
Betaine 3	0	0	0	0	0	0	0	0	0	0	0	0	0	0	0	0	0	0	0	0	0	0	0	0	0	0	0	0	0	0	0	0	0
Betaine 4	0	0	0	0	0	0	0	0	0	0	0	0	0	0	0	0	0	0	0	0	0	0	0	0	0	0	0	0	0	0	0	0	0
Betaine 5	0	0	0	0	0	0	0	0	0	0	0	0	0	0	0	0	0	0	0	0	0	0	0	0	0	0	0	0	0	0	0	0	0
Metabolite: CDP-ETHANOLAMINE	Formula: C11H20N4O11P2	Mass: 446.0604
-----------------------------------------------------------------------------
Group: 1
CDP-ethanolamine C11H20N4O11P2	blank1r	blank2r	blank3r	blank4	blank5	blank6	pooled_1	pooled_10	pooled_11	pooled_2	pooled_3	pooled_4	pooled_5	pooled_6	pooled_7	pooled_8	pooled_9	JK05	JK06	JK13	JK14	JK07	JK08	JK15	JK16	JK01	JK02	JK09	JK10	JK03	JK04	JK11	JK12
CDP-ethanolamine 0	0	0	0	0	0	0	197327	81874.2	140589	84121.6	140814	112514	147759	140570	137442	115764	128945	517870	327102	810749	609441	0	163377	90259.1	106288	517461	670791	510174	774180	975013	795154	1.21024e+06	1.09291e+06
CDP-ethanolamine 1	0	0	0	0	0	0	0	0	0	0	0	0	0	0	0	0	0	0	0	0	0	0	0	0	0	0	0	0	0	0	0	0	0
CDP-ethanolamine 2	0	0	0	0	0	0	0	0	0	0	0	0	0	0	0	0	0	0	0	0	0	0	106286	134106	78318.6	0	0	0	0	60775.7	0	179191	215295
CDP-ethanolamine 3	0	0	0	0	0	0	0	0	0	0	0	0	0	0	0	0	0	0	0	0	0	0	0	0	0	0	0	0	0	0	0	0	0
CDP-ethanolamine 4	0	0	0	0	0	0	0	0	0	0	0	0	0	0	0	0	0	0	0	0	0	0	0	0	0	0	0	0	0	0	0	0	0
CDP-ethanolamine 5	0	0	0	0	0	0	0	0	0	0	0	0	0	0	0	0	0	0	0	0	0	0	0	48781.7	0	0	0	0	0	0	0	0	0
CDP-ethanolamine 6	0	0	0	0	0	0	0	0	0	0	0	0	0	0	0	0	0	0	0	0	0	0	0	0	0	0	0	0	0	0	0	0	0
CDP-ethanolamine 7	0	0	0	0	0	0	0	0	0	0	0	0	0	0	0	0	0	0	0	0	0	0	0	0	0	0	0	0	0	0	0	0	0
CDP-ethanolamine 8	0	0	0	0	0	0	0	0	0	0	0	0	0	0	0	0	0	0	0	0	0	0	0	0	0	0	0	0	0	0	0	0	0
CDP-ethanolamine 9	0	0	0	0	0	0	0	0	0	0	0	0	0	0	0	0	0	0	0	0	0	0	0	0	0	0	0	0	0	0	0	0	0
CDP-ethanolamine 10	0	0	0	0	0	0	0	0	0	0	0	0	0	0	0	0	0	0	0	0	0	0	0	0	0	0	0	0	0	0	0	0	0
CDP-ethanolamine 11	0	0	0	0	0	0	0	0	0	0	0	0	0	0	0	0	0	0	0	0	0	0	0	0	0	0	0	0	0	0	0	0	0
Metabolite: CHOLINE PHOSPHATE	Formula: C5H14NO4P	Mass: 183.066
-----------------------------------------------------------------------------
Group: 1
Choline phosphate C5H14NO4P	blank1r	blank2r	blank3r	blank4	blank5	blank6	pooled_1	pooled_10	pooled_11	pooled_2	pooled_3	pooled_4	pooled_5	pooled_6	pooled_7	pooled_8	pooled_9	JK05	JK06	JK13	JK14	JK07	JK08	JK15	JK16	JK01	JK02	JK09	JK10	JK03	JK04	JK11	JK12
Choline phosphate 0	0	0	0	0	0	0	1.65829e+06	1.65375e+06	1.75742e+06	1.77664e+06	1.68788e+06	1.74186e+06	1.65695e+06	1.617e+06	1.73983e+06	1.65211e+06	1.78196e+06	4.21775e+06	3.58877e+06	4.68875e+06	4.02467e+06	3.57613e+06	4.42941e+06	3.24945e+06	3.80234e+06	6.61684e+06	6.01033e+06	7.44226e+06	6.44857e+06	7.81461e+06	8.0189e+06	6.7067e+06	6.17782e+06
Choline phosphate 1	0	0	0	0	0	0	0	0	0	0	0	0	19812.8	0	0	27743	0	64167.5	42145.2	0	65622.7	54132.4	0	0	0	151496	138630	137694	76108.3	89712	151359	98781.6	0
Choline phosphate 2	0	0	0	0	0	0	0	0	0	0	0	0	0	0	0	0	0	0	0	0	0	0	0	0	0	0	0	0	0	0	0	0	0
Choline phosphate 3	0	0	0	0	0	0	0	0	0	0	0	0	0	0	0	0	0	0	0	0	0	0	0	0	0	0	0	0	0	0	0	0	0
Choline phosphate 4	0	0	0	0	0	0	0	0	0	0	0	0	0	0	0	0	0	0	0	0	0	0	0	0	0	0	0	0	0	0	0	0	0
Choline phosphate 5	0	0	0	0	0	0	0	0	0	0	0	0	0	0	0	0	0	0	0	0	0	0	0	0	0	0	0	0	0	0	0	0	0
Metabolite: CIS-ACONITATE	Formula: C6H6O6	Mass: 174.0164
-----------------------------------------------------------------------------
Group: 1
cis-Aconitate C6H6O6	blank1r	blank2r	blank3r	blank4	blank5	blank6	pooled_1	pooled_10	pooled_11	pooled_2	pooled_3	pooled_4	pooled_5	pooled_6	pooled_7	pooled_8	pooled_9	JK05	JK06	JK13	JK14	JK07	JK08	JK15	JK16	JK01	JK02	JK09	JK10	JK03	JK04	JK11	JK12
cis-Aconitate 0	5.41652e+06	1.05523e+06	1.27509e+06	907287	1.26693e+06	1.00704e+06	1.34503e+06	117191	513372	969442	966316	693378	841226	763196	1.89206e+06	278774	320552	419370	1.03699e+06	1.49545e+06	525725	238955	1.3514e+06	876489	566637	873449	602847	372866	594146	702261	679277	763173	820806
cis-Aconitate 1	108926	0	0	0	0	0	0	0	0	0	0	0	0	0	0	0	0	0	0	0	0	0	0	0	0	0	0	0	0	0	0	0	0
cis-Aconitate 2	0	0	0	0	0	0	0	0	0	0	0	0	0	0	0	0	0	0	0	0	0	0	0	0	0	0	0	0	0	0	0	0	0
cis-Aconitate 3	0	0	0	0	0	0	0	0	0	0	0	0	0	0	0	0	0	0	0	0	0	0	0	0	0	0	0	0	0	0	0	0	0
cis-Aconitate 4	0	0	0	0	0	0	0	0	0	0	0	0	0	0	0	0	0	0	0	0	0	0	0	0	0	0	0	0	0	0	0	0	0
cis-Aconitate 5	0	0	0	0	0	0	0	0	0	0	0	0	0	0	0	0	0	0	0	0	0	0	0	0	0	0	0	0	0	0	0	0	0
cis-Aconitate 6	0	0	0	0	0	0	0	0	0	0	0	0	0	0	0	0	0	0	0	0	0	0	0	0	0	0	0	0	0	0	0	0	0
Metabolite: CITRATE	Formula: C6H8O7	Mass: 192.027
-----------------------------------------------------------------------------
Group: 1
Citrate C6H8O7	blank1r	blank2r	blank3r	blank4	blank5	blank6	pooled_1	pooled_10	pooled_11	pooled_2	pooled_3	pooled_4	pooled_5	pooled_6	pooled_7	pooled_8	pooled_9	JK05	JK06	JK13	JK14	JK07	JK08	JK15	JK16	JK01	JK02	JK09	JK10	JK03	JK04	JK11	JK12
Citrate 0	2.60476e+06	483151	542735	147965	203299	194519	2.15257e+06	652813	1.05704e+06	1.54982e+06	1.39247e+06	1.45566e+06	1.38149e+06	1.49043e+06	1.54006e+06	775690	941708	1.81997e+06	3.65219e+06	3.81796e+06	1.52326e+06	1.64516e+06	2.18911e+06	3.04056e+06	1.81852e+06	1.63233e+06	909756	673567	1.34388e+06	1.19047e+06	1.61399e+06	1.19355e+06	1.51503e+06
Citrate 1	0	0	0	0	0	0	23054.5	0	0	0	0	0	0	0	25064.8	0	0	0	101502	115302	0	0	71611.2	112828	51775.6	0	0	0	0	0	0	0	0
Citrate 2	0	0	0	0	0	0	0	0	0	0	0	0	0	0	0	0	0	0	0	0	0	0	0	0	0	0	0	0	0	0	0	0	0
Citrate 3	0	0	0	0	0	0	0	0	0	0	0	0	0	0	0	0	0	0	0	0	0	0	75993.4	36837.5	0	0	0	0	0	0	0	0	0
Citrate 4	0	0	0	0	0	0	0	0	0	0	0	0	0	0	0	0	0	0	0	0	0	0	0	0	0	0	0	0	0	0	0	0	0
Citrate 5	0	0	0	0	0	0	0	0	0	0	0	0	0	0	0	0	0	0	0	0	0	0	28583.9	0	0	0	0	0	0	0	0	0	0
Citrate 6	0	0	0	0	0	0	0	0	0	0	0	0	0	0	0	0	0	0	0	0	0	0	0	0	0	0	0	0	0	0	0	0	0
Metabolite: CMP-N-TRIMETHYL-2-AMINOETHYLPHOSPHONATE	Formula: C14H26N4O10P2	Mass: 472.1124
-----------------------------------------------------------------------------
Group: 1
CMP-N-trimethyl-2-aminoethylphosphonate C14H26N4O10P2	blank1r	blank2r	blank3r	blank4	blank5	blank6	pooled_1	pooled_10	pooled_11	pooled_2	pooled_3	pooled_4	pooled_5	pooled_6	pooled_7	pooled_8	pooled_9	JK05	JK06	JK13	JK14	JK07	JK08	JK15	JK16	JK01	JK02	JK09	JK10	JK03	JK04	JK11	JK12
CMP-N-trimethyl-2-aminoethylphosphonate 0	0	0	0	0	0	0	354677	280761	289283	334386	304868	336369	342617	339371	312958	288360	259682	1.52617e+06	938469	1.453e+06	1.1855e+06	344283	531408	267010	331953	1.68951e+06	1.98845e+06	1.75704e+06	1.81715e+06	1.5202e+06	1.65683e+06	1.67216e+06	1.73284e+06
CMP-N-trimethyl-2-aminoethylphosphonate 1	0	0	0	0	0	0	0	20290	0	0	0	0	0	0	0	0	18249.2	130590	78931.4	135575	93114.1	0	0	0	0	183318	216229	170965	210472	146392	178072	219635	169727
CMP-N-trimethyl-2-aminoethylphosphonate 2	0	0	0	0	0	0	0	0	14605.2	0	0	0	0	0	0	0	0	0	0	0	0	274530	425452	300322	291447	0	0	0	0	376167	419730	455475	366198
CMP-N-trimethyl-2-aminoethylphosphonate 3	0	0	0	0	0	0	0	0	0	0	0	0	0	0	0	0	0	0	0	0	0	40781.4	73060.9	48076.1	0	0	0	0	0	60467.7	70474.3	53655	63969.4
CMP-N-trimethyl-2-aminoethylphosphonate 4	0	0	0	0	0	0	0	0	0	0	0	0	0	0	0	0	0	0	0	0	0	0	0	0	0	0	0	0	0	0	0	0	0
CMP-N-trimethyl-2-aminoethylphosphonate 5	0	0	0	0	0	0	0	0	0	0	0	0	0	0	0	0	0	0	0	0	0	74916.2	154735	132984	107048	0	0	0	0	0	0	0	0
CMP-N-trimethyl-2-aminoethylphosphonate 6	0	0	0	0	0	0	0	0	0	0	0	0	0	0	0	0	0	0	0	0	0	0	0	0	0	0	0	0	0	0	0	0	0
CMP-N-trimethyl-2-aminoethylphosphonate 7	0	0	0	0	0	0	0	0	0	0	0	0	0	0	0	0	0	0	0	0	0	52937.9	50541.8	66667.4	94968.7	0	0	0	0	0	0	0	0
CMP-N-trimethyl-2-aminoethylphosphonate 8	0	0	0	0	0	0	0	0	0	0	0	0	0	0	0	0	0	0	0	0	0	0	0	0	0	0	0	0	0	0	0	0	0
CMP-N-trimethyl-2-aminoethylphosphonate 9	0	0	0	0	0	0	0	0	0	0	0	0	0	0	0	0	0	0	0	0	0	0	0	0	0	0	0	0	0	0	0	0	0
CMP-N-trimethyl-2-aminoethylphosphonate 10	0	0	0	0	0	0	0	0	0	0	0	0	0	0	0	0	0	0	0	0	0	0	0	0	0	0	0	0	0	0	0	0	0
CMP-N-trimethyl-2-aminoethylphosphonate 11	0	0	0	0	0	0	0	0	0	0	0	0	0	0	0	0	0	0	0	0	0	0	0	0	0	0	0	0	0	0	0	0	0
CMP-N-trimethyl-2-aminoethylphosphonate 12	0	0	0	0	0	0	0	0	0	0	0	0	0	0	0	0	0	0	0	0	0	0	0	0	0	0	0	0	0	0	0	0	0
CMP-N-trimethyl-2-aminoethylphosphonate 13	0	0	0	0	0	0	0	0	0	0	0	0	0	0	0	0	0	0	0	0	0	0	0	0	0	0	0	0	0	0	0	0	0
CMP-N-trimethyl-2-aminoethylphosphonate 14	0	0	0	0	0	0	0	0	0	0	0	0	0	0	0	0	0	0	0	0	0	0	0	0	0	0	0	0	0	0	0	0	0
Metabolite: CREATINE	Formula: C4H9N3O2	Mass: 131.0695
-----------------------------------------------------------------------------
Group: 1
Creatine C4H9N3O2	blank1r	blank2r	blank3r	blank4	blank5	blank6	pooled_1	pooled_10	pooled_11	pooled_2	pooled_3	pooled_4	pooled_5	pooled_6	pooled_7	pooled_8	pooled_9	JK05	JK06	JK13	JK14	JK07	JK08	JK15	JK16	JK01	JK02	JK09	JK10	JK03	JK04	JK11	JK12
Creatine 0	0	0	0	0	0	0	431080	431739	444084	482382	363187	452830	429771	374556	361948	351570	438289	1.80139e+06	1521128	2.05591e+06	1.19475e+06	1.31727e+06	1.57777e+06	1.33851e+06	1.29203e+06	1.53387e+06	1.5628e+06	1.35985e+06	1.50434e+06	1.68504e+06	1.42982e+06	1.38835e+06	1.2799e+06
Creatine 1	0	0	0	0	0	0	0	0	0	0	0	0	0	0	0	0	0	0	0	0	0	0	0	0	0	0	0	0	0	0	0	0	0
Creatine 2	0	0	0	0	0	0	0	0	0	0	0	0	0	0	0	0	0	0	0	0	0	0	0	0	0	0	0	0	0	0	0	0	0
Creatine 3	0	0	0	0	0	0	0	0	0	0	0	0	0	0	0	0	0	0	0	0	0	0	0	0	0	0	0	0	0	0	0	0	0
Creatine 4	0	0	0	0	0	0	0	0	0	0	0	0	0	0	0	0	0	0	0	0	0	0	0	0	0	0	0	0	0	0	0	0	0
Metabolite: CREATININE	Formula: C4H7N3O	Mass: 113.0589
-----------------------------------------------------------------------------
Group: 1
Creatinine C4H7N3O	blank1r	blank2r	blank3r	blank4	blank5	blank6	pooled_1	pooled_10	pooled_11	pooled_2	pooled_3	pooled_4	pooled_5	pooled_6	pooled_7	pooled_8	pooled_9	JK05	JK06	JK13	JK14	JK07	JK08	JK15	JK16	JK01	JK02	JK09	JK10	JK03	JK04	JK11	JK12
Creatinine 0	0	0	0	131294	107207	120029	652861	658754	873242	635061	576302	586555	657784	625446	713958	682167	690380	1.74133e+06	2.83684e+06	3.19267e+06	1.22433e+06	1.7547e+06	1.86621e+06	2.93332e+06	1.73801e+06	1.39769e+06	846962	1.14889e+06	1.5765e+06	1.02984e+06	1.49765e+06	1.44329e+06	1.34016e+06
Creatinine 1	0	0	0	0	0	0	0	0	0	15424.4	0	0	0	0	0	0	0	18690	69423.9	49927.1	0	31932.4	18425.3	45998.1	18496.4	0	0	0	17064	17738.4	0	0	0
Creatinine 2	0	0	0	0	0	0	0	0	0	0	0	0	0	0	0	0	0	0	0	0	0	0	0	0	0	0	0	0	0	0	0	0	0
Creatinine 3	0	0	0	0	0	0	0	0	0	0	0	0	0	0	0	0	0	0	0	0	0	0	0	0	0	0	0	0	0	0	0	0	0
Creatinine 4	0	0	0	0	0	0	0	0	0	0	0	0	0	0	0	0	0	0	0	0	0	0	0	0	0	0	0	0	0	0	0	0	0
Metabolite: CTP	Formula: C9H16N3O14P3	Mass: 482.9845
-----------------------------------------------------------------------------
Group: 1
CTP C9H16N3O14P3	blank1r	blank2r	blank3r	blank4	blank5	blank6	pooled_1	pooled_10	pooled_11	pooled_2	pooled_3	pooled_4	pooled_5	pooled_6	pooled_7	pooled_8	pooled_9	JK05	JK06	JK13	JK14	JK07	JK08	JK15	JK16	JK01	JK02	JK09	JK10	JK03	JK04	JK11	JK12
CTP 0	0	0	0	0	0	0	51895.6	0	0	32836.4	0	0	0	53647.1	0	0	0	0	520226	543646	492921	0	0	56538.4	0	81773.9	0	0	103201	212355	207431	175625	200090
CTP 1	0	0	0	0	0	0	0	0	0	0	0	0	0	0	0	0	0	0	0	0	0	0	0	0	0	0	0	0	0	0	0	0	0
CTP 2	0	0	0	0	0	0	0	0	0	0	0	0	0	0	0	0	0	0	0	0	0	0	29348.1	99239.2	0	0	0	0	0	0	45826.9	0	0
CTP 3	0	0	0	0	0	0	0	0	0	0	0	0	0	0	0	0	0	0	0	0	0	0	0	0	0	0	0	0	0	0	0	0	0
CTP 4	0	0	0	0	0	0	0	0	0	0	0	0	0	0	0	0	0	0	0	0	0	0	0	0	0	0	0	0	0	0	0	0	0
CTP 5	0	0	0	0	0	0	0	0	0	0	0	0	0	0	0	0	0	0	0	0	0	0	0	0	0	0	0	0	0	0	0	0	0
CTP 6	0	0	0	0	0	0	0	0	0	0	0	0	0	0	0	0	0	0	0	0	0	0	0	0	0	0	0	0	0	0	0	0	0
CTP 7	0	0	0	0	0	0	0	0	0	0	0	0	0	0	0	0	0	0	0	0	0	0	0	0	0	0	0	0	0	0	0	0	0
CTP 8	0	0	0	0	0	0	0	0	0	0	0	0	0	0	0	0	0	0	0	0	0	0	0	0	0	0	0	0	0	0	0	0	0
CTP 9	0	0	0	0	0	0	0	0	0	0	0	0	0	0	0	0	0	0	0	0	0	0	0	0	0	0	0	0	0	0	0	0	0
Metabolite: CYSTEINEMERCAPTOETHANOL DISULFIDE	Formula: C5H11NO3S2	Mass: 197.018
-----------------------------------------------------------------------------
Group: 1
CysteineMercaptoethanol disulfide C5H11NO3S2	blank1r	blank2r	blank3r	blank4	blank5	blank6	pooled_1	pooled_10	pooled_11	pooled_2	pooled_3	pooled_4	pooled_5	pooled_6	pooled_7	pooled_8	pooled_9	JK05	JK06	JK13	JK14	JK07	JK08	JK15	JK16	JK01	JK02	JK09	JK10	JK03	JK04	JK11	JK12
CysteineMercaptoethanol disulfide 0	0	0	0	0	0	0	1.39676e+06	1.36833e+06	1.1145e+06	1.27966e+06	1.21301e+06	1.42541e+06	1.19331e+06	1.30012e+06	1.28852e+06	1.22429e+06	1.25868e+06	3.30328e+06	8.7832e+06	8.95031e+06	2.7668e+06	4.749e+06	4.04093e+06	7.9408e+06	4.65727e+06	3.35149e+06	1.5413e+06	1.2142e+06	1.86015e+06	2.0629e+06	3.08642e+06	2.42021e+06	1.87259e+06
CysteineMercaptoethanol disulfide 1	0	0	0	0	0	0	23982.5	0	0	0	0	0	0	0	21978.1	0	0	128406	380978	428743	66992.4	174436	189924	344327	181515	113122	24316.5	26545.4	33094.3	34405.9	65625.7	104687	40423.5
CysteineMercaptoethanol disulfide 2	0	0	0	0	0	0	0	0	0	0	0	0	0	0	0	0	0	0	0	0	0	0	0	0	0	0	17477.8	0	0	20520.4	0	0	0
CysteineMercaptoethanol disulfide 3	0	0	0	0	0	0	0	0	0	0	0	0	0	0	0	0	0	0	0	0	0	0	0	0	0	0	0	0	0	0	0	0	0
CysteineMercaptoethanol disulfide 4	0	0	0	0	0	0	0	0	0	0	0	0	0	0	0	0	0	0	0	0	0	0	0	0	0	0	0	0	0	0	0	0	0
CysteineMercaptoethanol disulfide 5	0	0	0	0	0	0	0	0	0	0	0	0	0	0	0	0	0	0	0	0	0	0	0	0	0	0	0	0	0	0	0	0	0
Metabolite: D-ALANYL-D-ALANINE	Formula: C6H12N2O3	Mass: 160.0848
-----------------------------------------------------------------------------
Group: 1
D-Alanyl-D-alanine C6H12N2O3	blank1r	blank2r	blank3r	blank4	blank5	blank6	pooled_1	pooled_10	pooled_11	pooled_2	pooled_3	pooled_4	pooled_5	pooled_6	pooled_7	pooled_8	pooled_9	JK05	JK06	JK13	JK14	JK07	JK08	JK15	JK16	JK01	JK02	JK09	JK10	JK03	JK04	JK11	JK12
D-Alanyl-D-alanine 0	228198	367151	723824	942462	917931	964060	1.09636e+06	1.24373e+06	1.04843e+06	1.23185e+06	1.00979e+06	1.0821e+06	996741	1.22841e+06	1.13213e+06	1.17986e+06	1.27776e+06	2.02671e+06	1.57405e+06	2.03025e+06	2.08095e+06	1.19318e+06	1.26097e+06	1.13799e+06	1.33678e+06	1.70203e+06	1.76586e+06	2.62757e+06	2.31555e+06	1.92897e+06	1.70323e+06	1.8962e+06	2.2154e+06
D-Alanyl-D-alanine 1	0	0	0	0	0	0	0	0	0	0	0	0	0	0	0	0	0	0	0	23395.2	0	0	0	0	0	0	0	0	0	0	0	0	0
D-Alanyl-D-alanine 2	0	0	0	0	0	0	0	0	0	0	0	0	0	0	0	0	0	0	0	0	0	0	0	0	0	0	0	0	0	0	0	0	0
D-Alanyl-D-alanine 3	0	0	0	0	0	0	0	0	0	0	0	0	0	0	0	0	0	0	0	0	0	241108	252129	251818	254919	0	0	0	0	167809	204899	255409	232962
D-Alanyl-D-alanine 4	0	0	0	0	0	0	0	0	0	0	0	0	0	0	0	0	0	0	0	0	0	0	0	0	0	0	0	0	0	0	0	0	0
D-Alanyl-D-alanine 5	0	0	0	0	0	0	0	0	0	0	0	0	0	0	0	0	0	0	0	0	0	0	0	0	0	0	0	0	0	0	0	0	0
D-Alanyl-D-alanine 6	0	0	0	0	0	0	0	0	0	0	0	0	0	0	0	0	0	0	0	0	0	121390	118676	165395	158293	0	0	0	0	0	0	0	0
Metabolite: D-ERYTHROSE	Formula: C4H8O4	Mass: 120.0423
-----------------------------------------------------------------------------
Group: 1
D-Erythrose C4H8O4	blank1r	blank2r	blank3r	blank4	blank5	blank6	pooled_1	pooled_10	pooled_11	pooled_2	pooled_3	pooled_4	pooled_5	pooled_6	pooled_7	pooled_8	pooled_9	JK05	JK06	JK13	JK14	JK07	JK08	JK15	JK16	JK01	JK02	JK09	JK10	JK03	JK04	JK11	JK12
D-Erythrose 0	2.05646e+08	2.24017e+07	1.47124e+07	2.12393e+07	1.97234e+07	1.87703e+07	1.87876e+07	1.02796e+07	9.37695e+06	1.6383e+07	1.48787e+07	1.36822e+07	1.30069e+07	1.28191e+07	1.14787e+07	1.10571e+07	1.01747e+07	1.45958e+07	1.39131e+07	1.53834e+07	1.39909e+07	1.26776e+07	1.41627e+07	1.32893e+07	1.26073e+07	1.10761e+07	1.18324e+07	1.26177e+07	1.14458e+07	1.20943e+07	1.26333e+07	1.16631e+07	1.15359e+07
D-Erythrose 1	8.90228e+06	266442	87771.8	423873	350673	299096	241524	53565.9	80673.6	230269	176139	101819	151017	92557.5	67994.4	54930.8	65743.9	52147	88793.3	164889	90372.9	250984	320875	233030	282282	45825.2	86097.1	133120	54908.2	79199.9	38442.6	59411	30049.8
D-Erythrose 2	0	0	0	0	0	0	0	0	0	0	0	0	0	0	0	0	0	0	0	0	0	0	0	0	0	0	0	0	0	0	0	0	0
D-Erythrose 3	0	0	0	0	0	0	0	0	0	0	0	0	0	0	0	0	0	0	0	0	0	74181.5	107812	79596	151718	0	0	0	0	0	0	0	0
D-Erythrose 4	0	0	0	0	0	0	0	0	0	0	0	0	0	0	0	13716	0	0	0	0	0	613409	703051	1.34603e+06	1.38965e+06	0	0	0	0	0	0	0	0
Group: 2
D-Erythrose C4H8O4	blank1r	blank2r	blank3r	blank4	blank5	blank6	pooled_1	pooled_10	pooled_11	pooled_2	pooled_3	pooled_4	pooled_5	pooled_6	pooled_7	pooled_8	pooled_9	JK05	JK06	JK13	JK14	JK07	JK08	JK15	JK16	JK01	JK02	JK09	JK10	JK03	JK04	JK11	JK12
D-Erythrose 0	2.22939e+08	2.9166e+07	1.97902e+07	2.60756e+07	2.50187e+07	2.4163e+07	2.8784e+07	1.82036e+07	1.77008e+07	2.62891e+07	2.44935e+07	2.3486e+07	2.2803e+07	2.20994e+07	1.99339e+07	1.91843e+07	1.84015e+07	2.5679e+07	3.75825e+07	3.7935e+07	2.34128e+07	2.72049e+07	2.91882e+07	3.71265e+07	2.72523e+07	2.06795e+07	1.8416e+07	1.72147e+07	1.82259e+07	1.89461e+07	2.23333e+07	1.95631e+07	1.83427e+07
D-Erythrose 1	9.65033e+06	406648	171902	519760	444330	374984	557590	177513	217418	384710	282063	356051	250808	248788	204624	214203	194608	327649	404823	445774	172883	379808	618989	651050	334302	28881	108134	29775.6	54978.3	193366	117997	69082.5	63103.9
D-Erythrose 2	0	0	0	0	0	0	0	0	0	0	0	0	0	0	0	0	0	0	0	0	0	0	0	0	0	0	0	0	0	0	0	0	0
D-Erythrose 3	0	0	0	0	0	0	0	0	0	0	0	0	0	0	0	0	0	0	0	0	0	0	78565.8	0	38692	0	0	0	0	0	0	0	0
D-Erythrose 4	0	0	0	0	0	0	0	0	0	0	0	0	0	0	0	0	0	0	0	0	0	558638	582793	912362	1.11889e+06	0	0	0	0	0	0	0	0
Group: 3
D-Erythrose C4H8O4	blank1r	blank2r	blank3r	blank4	blank5	blank6	pooled_1	pooled_10	pooled_11	pooled_2	pooled_3	pooled_4	pooled_5	pooled_6	pooled_7	pooled_8	pooled_9	JK05	JK06	JK13	JK14	JK07	JK08	JK15	JK16	JK01	JK02	JK09	JK10	JK03	JK04	JK11	JK12
D-Erythrose 0	4.04784e+07	5.19894e+06	3.68459e+06	4.418e+06	4537458	4.41477e+06	7.64158e+06	5.58358e+06	5.82187e+06	7.1874e+06	6.70511e+06	6.48932e+06	6.66799e+06	6.38339e+06	5.81347e+06	6.04198e+06	5.82249e+06	9.47752e+06	1.3441e+07	1.42842e+07	7.66139e+06	1.03571e+07	1.15671e+07	1.5146e+07	9.80638e+06	6.19374e+06	5.28138e+06	4.15282e+06	4.99198e+06	5.3145e+06	6.82395e+06	5.81833e+06	5.24285e+06
D-Erythrose 1	1.74326e+06	62752.5	49412.2	73650.4	85629.4	66611.1	154812	87851.3	57858.4	97682.6	68102.7	126742	74025.5	80004.3	57123.8	79788.1	66636.7	161383	266716	229818	54685.3	114794	323093	228844	90858.5	0	49035.2	0	0	0	0	0	0
D-Erythrose 2	0	0	0	0	0	0	0	0	0	0	0	0	0	0	0	0	0	0	0	0	0	0	0	0	0	0	0	0	0	0	0	0	0
D-Erythrose 3	0	0	0	0	0	0	0	0	0	0	0	0	0	0	0	0	0	0	0	0	0	0	0	0	0	0	0	0	0	0	0	0	0
D-Erythrose 4	0	0	0	0	0	0	0	0	0	0	0	0	0	0	0	0	0	0	0	0	0	204162	249188	121996	170919	0	0	0	0	0	0	0	0
Metabolite: D-FRUCTOSE 1,6-BISPHOSPHATE	Formula: C6H14O12P2	Mass: 339.996
-----------------------------------------------------------------------------
Group: 1
D-Fructose 1,6-bisphosphate C6H14O12P2	blank1r	blank2r	blank3r	blank4	blank5	blank6	pooled_1	pooled_10	pooled_11	pooled_2	pooled_3	pooled_4	pooled_5	pooled_6	pooled_7	pooled_8	pooled_9	JK05	JK06	JK13	JK14	JK07	JK08	JK15	JK16	JK01	JK02	JK09	JK10	JK03	JK04	JK11	JK12
D-Fructose 1,6-bisphosphate 0	0	0	0	0	0	0	6.29507e+06	3.29703e+06	5.1161e+06	5.68031e+06	5.5507e+06	5.56918e+06	5.6712e+06	5.30842e+06	6.02653e+06	4.08299e+06	4.61362e+06	1.88508e+06	1.40941e+07	1.55643e+07	1.08923e+07	659390	1.69186e+06	659033	570609	3.89368e+07	2.74829e+07	3.52068e+07	2.69128e+07	2.81036e+07	2.60416e+07	2.06647e+07	1.66721e+07
D-Fructose 1,6-bisphosphate 1	0	0	0	0	0	0	363752	0	190841	301736	248317	270305	257624	264887	329436	0	150497	0	766014	871852	558315	0	0	0	0	2.48334e+06	1.73054e+06	2.09918e+06	1.56925e+06	1.62683e+06	1.67731e+06	1.21742e+06	1.10011e+06
D-Fructose 1,6-bisphosphate 2	0	0	0	0	0	0	0	0	0	0	0	0	0	0	0	0	0	0	0	0	0	0	0	0	0	0	0	0	0	0	0	0	0
D-Fructose 1,6-bisphosphate 3	0	0	0	0	0	0	455990	94347.8	302828	399154	417552	318878	377707	396104	397030	139176	215883	0	0	0	0	3.01396e+06	4.80413e+06	3.37807e+06	2.47036e+06	0	0	0	0	3.56388e+06	3.0039e+06	2.2177e+06	1.57607e+06
D-Fructose 1,6-bisphosphate 4	0	0	0	0	0	0	0	0	0	0	0	0	0	0	0	0	0	0	0	0	0	0	88433.6	0	0	0	0	0	0	0	0	0	0
D-Fructose 1,6-bisphosphate 5	0	0	0	0	0	0	0	0	0	0	0	0	0	0	0	0	0	0	0	0	0	91907.4	147624	273617	57949.3	0	0	0	0	0	0	0	0
D-Fructose 1,6-bisphosphate 6	0	0	0	0	0	0	497232	93762.1	321662	347452	372065	424107	416776	409947	482464	160390	237906	0	0	0	0	5.14106e+06	6.20476e+06	8.96818e+06	5.6714e+06	0	0	0	0	0	50582.6	0	0
Metabolite: D-FRUCTOSE 6-PHOSPHATE	Formula: C6H13O9P	Mass: 260.0297
-----------------------------------------------------------------------------
Group: 1
D-Fructose 6-phosphate C6H13O9P	blank1r	blank2r	blank3r	blank4	blank5	blank6	pooled_1	pooled_10	pooled_11	pooled_2	pooled_3	pooled_4	pooled_5	pooled_6	pooled_7	pooled_8	pooled_9	JK05	JK06	JK13	JK14	JK07	JK08	JK15	JK16	JK01	JK02	JK09	JK10	JK03	JK04	JK11	JK12
D-Fructose 6-phosphate 0	0	0	0	0	0	0	1.71028e+07	1.30307e+07	1.44001e+07	1.53294e+07	1.54444e+07	1.55407e+07	1.54178e+07	1.53433e+07	1.56748e+07	1.31191e+07	1.37966e+07	2.09456e+07	4.1834e+07	4.13221e+07	3.50869e+07	9.12759e+06	1.07035e+07	1.03031e+07	8.34713e+06	9.04337e+07	7.05192e+07	1.1808e+08	9.34385e+07	5.50377e+07	5.97141e+07	5.40201e+07	6.18306e+07
D-Fructose 6-phosphate 1	0	0	0	0	0	0	948197	505659	780795	820437	826347	810234	817831	902072	943758	635960	714291	1.18897e+06	2.3783e+06	2.36787e+06	2.10845e+06	301321	373843	330853	159857	6.09313e+06	4.31507e+06	7.99542e+06	6.15597e+06	3.26724e+06	3.67172e+06	3.27484e+06	3.9008e+06
D-Fructose 6-phosphate 2	0	0	0	0	0	0	0	0	0	0	0	0	0	0	0	0	0	0	0	0	0	0	0	0	0	0	0	0	0	0	0	0	0
D-Fructose 6-phosphate 3	0	0	0	0	0	0	757393	405255	549796	583971	483124	511418	462537	601548	578063	456617	510910	0	0	0	0	6.31326e+06	6.69859e+06	6.02478e+06	7.61359e+06	0	0	0	0	4.89149e+06	4.21787e+06	3.57171e+06	3.75533e+06
D-Fructose 6-phosphate 4	0	0	0	0	0	0	0	0	0	0	0	0	0	0	0	0	0	0	0	0	0	0	49310.9	0	50976.7	0	0	0	0	0	0	0	42910.7
D-Fructose 6-phosphate 5	0	0	0	0	0	0	0	0	0	0	0	0	0	0	0	0	0	0	0	0	0	228323	72390.2	244216	396839	0	0	0	0	0	0	0	0
D-Fructose 6-phosphate 6	0	0	0	0	0	0	891538	648344	771436	814401	933177	959463	875101	900515	949563	752356	830499	0	0	0	0	1.29833e+07	1.28527e+07	1.88976e+07	2.06581e+07	0	0	0	0	48334.3	69377.6	0	64498.5
Group: 2
D-Fructose 6-phosphate C6H13O9P	blank1r	blank2r	blank3r	blank4	blank5	blank6	pooled_1	pooled_10	pooled_11	pooled_2	pooled_3	pooled_4	pooled_5	pooled_6	pooled_7	pooled_8	pooled_9	JK05	JK06	JK13	JK14	JK07	JK08	JK15	JK16	JK01	JK02	JK09	JK10	JK03	JK04	JK11	JK12
D-Fructose 6-phosphate 0	0	0	0	0	0	0	5.58082e+06	4.15889e+06	4.95577e+06	5.05551e+06	5.13131e+06	5.20998e+06	5.07702e+06	5.00605e+06	5.45516e+06	4.27294e+06	4.67065e+06	4.23893e+06	1.25059e+07	1.29992e+07	1.07281e+07	4.77886e+06	5.42531e+06	5.99668e+06	4.53902e+06	2.48286e+07	1.75276e+07	3.4138e+07	3.11705e+07	2.09735e+07	2.29166e+07	2.22723e+07	2.35187e+07
D-Fructose 6-phosphate 1	0	0	0	0	0	0	280247	0	214049	181607	216696	249487	243801	235629	251438	110536	218061	158574	709018	674984	521184	210868	229034	277784	159857	1.57898e+06	1.03065e+06	2.4152e+06	1.98034e+06	1.24099e+06	1.53029e+06	1.36018e+06	1.5014e+06
D-Fructose 6-phosphate 2	0	0	0	0	0	0	0	0	0	0	0	0	0	0	0	0	0	0	0	0	0	0	0	0	0	0	0	0	0	0	0	0	0
D-Fructose 6-phosphate 3	0	0	0	0	0	0	170152	50190.6	86719.2	83648.7	57662	79175.9	50064.8	145704	105755	63183.2	70734	0	0	0	0	1.40728e+06	1.17965e+06	1.61064e+06	1.66052e+06	0	0	0	0	1.18762e+06	1.1715e+06	1.027e+06	885002
D-Fructose 6-phosphate 4	0	0	0	0	0	0	0	0	0	0	0	0	0	0	0	0	0	0	0	0	0	0	0	0	0	0	0	0	0	0	0	0	0
D-Fructose 6-phosphate 5	0	0	0	0	0	0	0	0	0	0	0	0	0	0	0	0	0	0	0	0	0	0	0	30479.3	0	0	0	0	0	0	0	0	0
D-Fructose 6-phosphate 6	0	0	0	0	0	0	88717.3	51722.6	115766	145156	120630	201122	113953	134163	140466	70243.2	109675	0	0	0	0	2.54065e+06	1.99278e+06	4.56625e+06	3.87233e+06	0	0	0	0	0	0	0	0
Metabolite: D-GLUCONIC ACID	Formula: C6H12O7	Mass: 196.0583
-----------------------------------------------------------------------------
Group: 1
D-Gluconic acid C6H12O7	blank1r	blank2r	blank3r	blank4	blank5	blank6	pooled_1	pooled_10	pooled_11	pooled_2	pooled_3	pooled_4	pooled_5	pooled_6	pooled_7	pooled_8	pooled_9	JK05	JK06	JK13	JK14	JK07	JK08	JK15	JK16	JK01	JK02	JK09	JK10	JK03	JK04	JK11	JK12
D-Gluconic acid 0	772669	0	226318	236471	182396	235411	2.04552e+08	1.7136e+08	1.83313e+08	1.93896e+08	1.90351e+08	1.94213e+08	1.93412e+08	1.94342e+08	1.90617e+08	1.78126e+08	1.84803e+08	4.32098e+08	2.85613e+08	3.73257e+08	3.04759e+08	2.52148e+08	3.91227e+08	1.80532e+08	1.90359e+08	5.63396e+08	6.47425e+08	6.41271e+08	6.21765e+08	8.14831e+08	8.65501e+08	6.83323e+08	670337422
D-Gluconic acid 1	0	0	0	0	0	0	1.38807e+07	1.15574e+07	1.22194e+07	1.30096e+07	1.24221e+07	1.29581e+07	1.30285e+07	1.31265e+07	1.25143e+07	1.16513e+07	1.20754e+07	2.82823e+07	1.91513e+07	2.49507e+07	1.961e+07	1.66457e+07	2.60274e+07	1.16944e+07	1.25097e+07	3.84115e+07	4.38854e+07	4.28337e+07	4.16746e+07	5.40277e+07	5.75728e+07	4.60173e+07	4.51287e+07
D-Gluconic acid 2	0	0	0	0	0	0	0	0	0	0	0	0	0	0	0	0	0	0	0	0	0	616041	756684	1.03316e+06	1.26161e+06	0	0	0	0	0	0	0	0
D-Gluconic acid 3	0	0	0	0	0	0	7.84761e+06	6.72149e+06	6.99918e+06	7.24095e+06	7.3563e+06	7.54715e+06	7.42718e+06	7.49553e+06	7.09398e+06	6.7354e+06	6.99422e+06	0	0	0	0	3.98849e+07	5.82729e+07	3.44452e+07	3.87766e+07	0	0	0	0	5.17975e+07	4.88777e+07	3.75515e+07	3.61439e+07
D-Gluconic acid 4	0	0	0	0	0	0	126524	91542	88645.3	139911	118072	144877	132375	128454	102709	66464.6	95010.5	0	0	0	0	1.29975e+06	1.85169e+06	1.09075e+06	1.4826e+06	0	0	0	0	1.56772e+06	1.41071e+06	1.05389e+06	891651
D-Gluconic acid 5	0	0	0	0	0	0	770691	530882	427029	556319	603874	500470	665539	596702	484069	567636	731959	0	0	0	0	6.5358e+06	9.43026e+06	1.05319e+07	1.12185e+07	0	0	0	0	667278	175594	318505	749607
D-Gluconic acid 6	0	0	0	0	0	0	6.77347e+06	5.84644e+06	6.00544e+06	6.10523e+06	6.38196e+06	6.44012e+06	6.42715e+06	6.52812e+06	6.18693e+06	5.93012e+06	6.42581e+06	0	0	0	0	5.68447e+07	7.64365e+07	8.84537e+07	8.55451e+07	0	0	0	0	1.21539e+07	1.06303e+07	8.78209e+06	7.33306e+06
Group: 2
D-Gluconic acid C6H12O7	blank1r	blank2r	blank3r	blank4	blank5	blank6	pooled_1	pooled_10	pooled_11	pooled_2	pooled_3	pooled_4	pooled_5	pooled_6	pooled_7	pooled_8	pooled_9	JK05	JK06	JK13	JK14	JK07	JK08	JK15	JK16	JK01	JK02	JK09	JK10	JK03	JK04	JK11	JK12
D-Gluconic acid 0	0	0	43211.9	115620	98677.5	108087	955276	165133	399029	666234	694050	699839	680314	595024	779910	363980	449546	881283	1.05019e+06	1.22192e+06	655276	537989	1.38565e+06	295324	235585	2.83198e+06	2.57709e+06	1.66068e+06	2.40492e+06	2.98265e+06	4.85168e+06	2.25365e+06	3.15757e+06
D-Gluconic acid 1	0	0	0	0	0	0	24228.7	0	0	0	0	0	0	0	0	0	0	0	0	0	0	0	0	0	0	0	0	0	0	0	0	0	0
D-Gluconic acid 2	0	0	0	0	0	0	0	0	0	0	0	0	0	0	0	0	0	0	0	0	0	0	0	0	0	0	0	0	0	0	0	0	0
D-Gluconic acid 3	0	0	0	0	0	0	0	0	0	0	0	0	0	0	0	0	0	0	0	0	0	0	0	0	0	0	0	0	0	0	0	0	0
D-Gluconic acid 4	0	0	0	0	0	0	0	0	0	0	0	0	0	0	0	0	0	0	0	0	0	0	0	0	0	0	0	0	0	0	0	0	0
D-Gluconic acid 5	0	0	0	0	0	0	0	0	0	0	0	0	0	0	0	0	0	0	0	0	0	0	0	0	0	0	0	0	0	0	0	0	0
D-Gluconic acid 6	0	0	0	0	0	0	0	0	0	0	0	0	0	0	0	0	0	0	0	0	0	0	0	0	0	0	0	0	0	0	0	0	0
Metabolite: D-GLUCOSAMINE 6-PHOSPHATE	Formula: C6H14NO8P	Mass: 259.0457
-----------------------------------------------------------------------------
Group: 1
D-Glucosamine 6-phosphate C6H14NO8P	blank1r	blank2r	blank3r	blank4	blank5	blank6	pooled_1	pooled_10	pooled_11	pooled_2	pooled_3	pooled_4	pooled_5	pooled_6	pooled_7	pooled_8	pooled_9	JK05	JK06	JK13	JK14	JK07	JK08	JK15	JK16	JK01	JK02	JK09	JK10	JK03	JK04	JK11	JK12
D-Glucosamine 6-phosphate 0	0	0	0	0	0	0	4.86036e+06	4.16894e+06	4.49191e+06	4.74981e+06	4.55139e+06	4.50051e+06	4.42014e+06	4.66478e+06	4.70055e+06	4.19243e+06	4.44119e+06	1.52131e+07	1.12644e+07	2.17571e+07	1.58528e+07	7.18779e+06	8.4309e+06	8.45566e+06	9.56262e+06	1.85964e+07	1.94366e+07	2.49974e+07	2.72809e+07	1.52595e+07	1.66362e+07	1.89577e+07	2.06564e+07
D-Glucosamine 6-phosphate 1	0	0	0	0	0	0	188404	139413	136865	138887	166214	73120.4	131919	143550	100483	81824.6	84768.3	823430	187980	606409	684567	0	139950	96522.3	221329	833463	963788	1.09357e+06	1.2312e+06	567139	376044	861514	932674
D-Glucosamine 6-phosphate 2	0	0	0	0	0	0	0	0	0	0	0	0	0	0	0	0	0	0	0	0	0	0	0	0	0	0	0	0	0	0	0	0	0
D-Glucosamine 6-phosphate 3	0	0	0	0	0	0	658693	445647	542317	620456	481125	537188	502238	595597	568969	402450	502510	0	0	0	0	4.21798e+06	5.57866e+06	6.39616e+06	6.76795e+06	0	0	0	0	4.03537e+06	4.80941e+06	5.7788e+06	5.84163e+06
D-Glucosamine 6-phosphate 4	0	0	0	0	0	0	0	0	0	0	0	0	0	0	0	0	0	0	0	0	0	0	0	0	0	0	0	0	0	0	0	0	0
D-Glucosamine 6-phosphate 5	0	0	0	0	0	0	0	0	0	0	0	0	0	0	0	0	0	0	0	0	0	0	0	0	0	0	0	0	0	0	0	0	0
D-Glucosamine 6-phosphate 6	0	0	0	0	0	0	0	0	0	0	0	0	0	0	0	0	0	0	0	0	0	0	0	0	49017.2	0	0	0	0	0	0	0	0
Metabolite: D-GLUCOSE	Formula: C6H12O6	Mass: 180.0634
-----------------------------------------------------------------------------
Group: 1
D-Glucose C6H12O6	blank1r	blank2r	blank3r	blank4	blank5	blank6	pooled_1	pooled_10	pooled_11	pooled_2	pooled_3	pooled_4	pooled_5	pooled_6	pooled_7	pooled_8	pooled_9	JK05	JK06	JK13	JK14	JK07	JK08	JK15	JK16	JK01	JK02	JK09	JK10	JK03	JK04	JK11	JK12
D-Glucose 0	3.1504e+06	382935	677414	1.38645e+06	1.25097e+06	1.20784e+06	2.47633e+07	2.93344e+07	2.78251e+07	2.52999e+07	2.54521e+07	2.60201e+07	2.63413e+07	2.58652e+07	2.32504e+07	2.81256e+07	2.93917e+07	4.27386e+07	7.49781e+07	7.61574e+07	3.62036e+07	5.25452e+07	4.85739e+07	7.70725e+07	4.98587e+07	2.87742e+07	2.08118e+07	1.87706e+07	2.7496e+07	2.24178e+07	2.89318e+07	2.84558e+07	2.28649e+07
D-Glucose 1	0	0	0	0	0	0	1.19475e+06	1.66899e+06	1.36265e+06	1.18348e+06	1.37412e+06	1.36057e+06	1.27811e+06	1.1953e+06	1.19407e+06	1.45011e+06	1.49695e+06	2.34016e+06	4.02034e+06	4.28804e+06	1.69062e+06	2.80842e+06	2.8454e+06	4.71683e+06	2.6312e+06	1.1057e+06	600522	432970	716726	638832	694153	998267	695878
D-Glucose 2	0	0	0	0	0	0	0	0	0	0	0	0	0	0	0	0	0	0	0	0	0	0	0	0	0	0	0	0	0	0	0	0	0
D-Glucose 3	0	0	0	0	0	0	0	0	29016.8	0	0	0	27924.1	0	0	0	0	0	0	0	0	110477	264981	557272	1.16342e+06	0	0	0	0	0	0	0	0
D-Glucose 4	0	0	0	0	0	0	0	0	0	0	0	0	0	0	0	0	0	0	0	0	0	0	0	0	0	0	0	0	0	0	0	0	0
D-Glucose 5	0	0	0	0	0	0	0	0	0	0	0	0	0	0	0	0	0	0	0	0	0	0	0	0	0	0	0	0	0	0	0	0	0
D-Glucose 6	0	0	0	0	0	0	84220.1	165939	130679	170682	91718.8	107494	112751	108069	99589	141009	135458	0	0	0	0	1.17059e+06	1.25835e+06	2.97687e+06	3.97224e+06	0	0	0	0	0	0	0	0
Group: 2
D-Glucose C6H12O6	blank1r	blank2r	blank3r	blank4	blank5	blank6	pooled_1	pooled_10	pooled_11	pooled_2	pooled_3	pooled_4	pooled_5	pooled_6	pooled_7	pooled_8	pooled_9	JK05	JK06	JK13	JK14	JK07	JK08	JK15	JK16	JK01	JK02	JK09	JK10	JK03	JK04	JK11	JK12
D-Glucose 0	1.8962e+06	217293	364040	694368	684081	576926	1.84082e+07	2.2561e+07	2.1241e+07	1.91593e+07	1.95236e+07	1.98399e+07	2.00809e+07	1.98367e+07	1.76899e+07	2.17961e+07	2.25669e+07	3.41255e+07	5.62167e+07	5.75255e+07	2.50579e+07	41682842	4.04991e+07	6.26224e+07	4.01297e+07	1.78328e+07	1.40047e+07	1.07144e+07	1.61337e+07	1.53549e+07	1.94607e+07	2.03756e+07	1.49081e+07
D-Glucose 1	0	0	0	0	0	0	1.01028e+06	1.41774e+06	1.21483e+06	1.02099e+06	1.19763e+06	1.16535e+06	1.13467e+06	1.03482e+06	1.01968e+06	1.21518e+06	1.29471e+06	2.16334e+06	3.08355e+06	3.47321e+06	1.34089e+06	2.57455e+06	2.63846e+06	4.1055e+06	2.26833e+06	758326	501616	330734	452414	520218	488169	950720	558377
D-Glucose 2	0	0	0	0	0	0	0	0	0	0	0	0	0	0	0	0	0	0	0	0	0	0	0	0	0	0	0	0	0	0	0	0	0
D-Glucose 3	0	0	0	0	0	0	0	0	0	0	0	0	0	0	0	0	0	0	0	0	0	0	0	0	0	0	0	0	0	0	0	0	0
D-Glucose 4	0	0	0	0	0	0	0	0	0	0	0	0	0	0	0	0	0	0	0	0	0	0	0	0	0	0	0	0	0	0	0	0	0
D-Glucose 5	0	0	0	0	0	0	0	0	0	0	0	0	0	0	0	0	0	0	0	0	0	0	0	0	0	0	0	0	0	0	0	0	0
D-Glucose 6	0	0	0	0	0	0	0	0	0	0	0	0	0	0	0	0	0	0	0	0	0	0	0	0	0	0	0	0	0	0	0	0	0
Group: 3
D-Glucose C6H12O6	blank1r	blank2r	blank3r	blank4	blank5	blank6	pooled_1	pooled_10	pooled_11	pooled_2	pooled_3	pooled_4	pooled_5	pooled_6	pooled_7	pooled_8	pooled_9	JK05	JK06	JK13	JK14	JK07	JK08	JK15	JK16	JK01	JK02	JK09	JK10	JK03	JK04	JK11	JK12
D-Glucose 0	208190	0	87932.9	359242	325376	283049	6.78674e+06	3.94511e+06	5.30566e+06	5.38132e+06	5.47791e+06	5.4701e+06	5.40803e+06	5.43315e+06	5.65872e+06	4.15383e+06	4.54684e+06	2.04402e+07	1.86432e+07	2.48155e+07	1.47629e+07	1.29726e+07	1.76392e+07	1.86895e+07	1.78604e+07	1.15054e+07	8.56574e+06	1.00296e+07	1.14422e+07	7.72483e+06	8.55323e+06	7.23982e+06	8.63517e+06
D-Glucose 1	0	0	0	0	0	0	412744	0	229073	228724	260189	237857	253229	206268	323351	69424	126870	1.17027e+06	1.12644e+06	1.56227e+06	723534	573358	1.07954e+06	1.17971e+06	1.06553e+06	646580	404588	463056	544988	288461	400517	264292	479989
D-Glucose 2	0	0	0	0	0	0	0	0	0	0	0	0	0	0	0	0	0	0	0	0	0	0	0	0	0	0	0	0	0	0	0	0	0
D-Glucose 3	0	0	0	0	0	0	0	0	0	0	0	0	0	0	0	0	0	0	0	0	0	0	0	0	0	0	0	0	0	0	0	0	0
D-Glucose 4	0	0	0	0	0	0	0	0	0	0	0	0	0	0	0	0	0	0	0	0	0	0	0	0	0	0	0	0	0	0	0	0	0
D-Glucose 5	0	0	0	0	0	0	0	0	0	0	0	0	0	0	0	0	0	0	0	0	0	0	0	0	0	0	0	0	0	0	0	0	0
D-Glucose 6	0	0	0	0	0	0	0	0	0	0	0	0	0	0	0	0	0	0	0	0	0	0	0	0	0	0	0	0	0	0	0	0	0
Group: 4
D-Glucose C6H12O6	blank1r	blank2r	blank3r	blank4	blank5	blank6	pooled_1	pooled_10	pooled_11	pooled_2	pooled_3	pooled_4	pooled_5	pooled_6	pooled_7	pooled_8	pooled_9	JK05	JK06	JK13	JK14	JK07	JK08	JK15	JK16	JK01	JK02	JK09	JK10	JK03	JK04	JK11	JK12
D-Glucose 0	1.83814e+06	182973	401075	715894	572545	612557	6.80628e+06	7.63302e+06	7.03657e+06	6.82331e+06	6.58545e+06	7.03266e+06	6.79899e+06	6.77809e+06	6.02868e+06	6.95961e+06	7.51744e+06	8.89408e+06	1.99235e+07	1.89385e+07	1.15746e+07	1.17418e+07	8.87525e+06	1.49563e+07	1.00797e+07	1.0917e+07	6.2869e+06	7.40018e+06	1.00336e+07	5.85809e+06	7.52897e+06	6.88852e+06	6.32387e+06
D-Glucose 1	0	0	0	0	0	0	208818	301303	157674	192290	207900	224319	143437	182186	183497	244739	233523	197737	980492	828847	341509	276445	270572	624583	387940	374442	89553.5	102236	243961	53154.6	166247	51621.4	88230.7
D-Glucose 2	0	0	0	0	0	0	0	0	0	0	0	0	0	0	0	0	0	0	0	0	0	0	0	0	0	0	0	0	0	0	0	0	0
D-Glucose 3	0	0	0	0	0	0	0	0	29016.8	0	0	0	27924.1	0	0	0	0	0	0	0	0	110477	264981	557272	1.18139e+06	0	0	0	0	0	0	0	0
D-Glucose 4	0	0	0	0	0	0	0	0	0	0	0	0	0	0	0	0	0	0	0	0	0	0	0	0	0	0	0	0	0	0	0	0	0
D-Glucose 5	0	0	0	0	0	0	0	0	0	0	0	0	0	0	0	0	0	0	0	0	0	0	0	0	0	0	0	0	0	0	0	0	0
D-Glucose 6	0	0	0	0	0	0	84220.1	165939	130679	170682	91718.8	107494	112751	108069	99589	141009	135458	0	0	0	0	1.17059e+06	1.24742e+06	3.04139e+06	4.02538e+06	0	0	0	0	0	0	0	0
Group: 5
D-Glucose C6H12O6	blank1r	blank2r	blank3r	blank4	blank5	blank6	pooled_1	pooled_10	pooled_11	pooled_2	pooled_3	pooled_4	pooled_5	pooled_6	pooled_7	pooled_8	pooled_9	JK05	JK06	JK13	JK14	JK07	JK08	JK15	JK16	JK01	JK02	JK09	JK10	JK03	JK04	JK11	JK12
D-Glucose 0	384373	70127.5	92915.5	387321	346555	404600	1.8107e+06	1.69457e+06	2.02899e+06	1.85311e+06	1.9211e+06	1.60771e+06	1.73756e+06	1.73503e+06	1.64932e+06	1.88734e+06	1.90418e+06	3.34467e+06	6.06595e+06	6.43935e+06	2.50476e+06	3.90028e+06	3.46332e+06	5.94586e+06	3.88939e+06	3.26026e+06	2.80108e+06	2.6827e+06	4.21062e+06	3.64588e+06	4.47168e+06	3.66837e+06	3.57789e+06
D-Glucose 1	0	0	0	0	0	0	0	30353.5	0	24508.9	34888.4	18597.9	0	34209.3	0	0	0	62422.1	169138	123263	0	73006	94169.4	191773	95560.7	50894.9	0	0	0	65459.1	39737.3	47018.5	49269.8
D-Glucose 2	0	0	0	0	0	0	0	0	0	0	0	0	0	0	0	0	0	0	0	0	0	0	0	0	0	0	0	0	0	0	0	0	0
D-Glucose 3	0	0	0	0	0	0	0	0	0	0	0	0	0	0	0	0	0	0	0	0	0	0	0	0	0	0	0	0	0	0	0	0	0
D-Glucose 4	0	0	0	0	0	0	0	0	0	0	0	0	0	0	0	0	0	0	0	0	0	0	0	0	0	0	0	0	0	0	0	0	0
D-Glucose 5	0	0	0	0	0	0	0	0	0	0	0	0	0	0	0	0	0	0	0	0	0	0	0	0	0	0	0	0	0	0	0	0	0
D-Glucose 6	0	0	0	0	0	0	0	0	0	0	0	0	0	0	0	0	0	0	0	0	0	0	0	0	0	0	0	0	0	0	0	0	0
Group: 6
D-Glucose C6H12O6	blank1r	blank2r	blank3r	blank4	blank5	blank6	pooled_1	pooled_10	pooled_11	pooled_2	pooled_3	pooled_4	pooled_5	pooled_6	pooled_7	pooled_8	pooled_9	JK05	JK06	JK13	JK14	JK07	JK08	JK15	JK16	JK01	JK02	JK09	JK10	JK03	JK04	JK11	JK12
D-Glucose 0	891823	177722	264088	852696	770424	703287	2.48446e+06	2.46403e+06	2.33965e+06	2.46354e+06	2.28005e+06	2.25704e+06	2.20247e+06	2.20132e+06	1.83288e+06	2.31258e+06	2.52361e+06	5.29901e+06	8.34771e+06	9.88904e+06	4.38472e+06	5.63847e+06	5.30186e+06	8.02968e+06	5.89687e+06	5.15603e+06	3.4868e+06	3.76671e+06	5.01197e+06	4.26518e+06	5.07346e+06	5.21792e+06	4.38784e+06
D-Glucose 1	0	0	0	0	0	0	29105.8	0	0	15134.6	34316	17795.7	13665.3	15839.7	16420.9	39992.3	41319	94435.2	342480	393714	63836.3	197240	185427	397468	196569	143356	35383.9	61480.9	106077	74976.1	167240	109948	93871.2
D-Glucose 2	0	0	0	0	0	0	0	0	0	0	0	0	0	0	0	0	0	0	0	0	0	0	0	0	0	0	0	0	0	0	0	0	0
D-Glucose 3	0	0	0	0	0	0	0	0	0	0	0	0	0	0	0	0	0	0	0	0	0	0	0	0	0	0	0	0	0	0	0	0	0
D-Glucose 4	0	0	0	0	0	0	0	0	0	0	0	0	0	0	0	0	0	0	0	0	0	0	0	0	0	0	0	0	0	0	0	0	0
D-Glucose 5	0	0	0	0	0	0	0	0	0	0	0	0	0	0	0	0	0	0	0	0	0	0	0	0	0	0	0	0	0	0	0	0	0
D-Glucose 6	0	0	0	0	0	0	0	0	0	0	0	0	0	0	0	0	0	0	0	0	0	0	0	0	20287.9	0	0	0	0	0	0	0	0
Metabolite: D-GLUCOSE 6-PHOSPHATE	Formula: C6H13O9P	Mass: 260.0297
-----------------------------------------------------------------------------
Group: 1
D-Glucose 6-phosphate C6H13O9P	blank1r	blank2r	blank3r	blank4	blank5	blank6	pooled_1	pooled_10	pooled_11	pooled_2	pooled_3	pooled_4	pooled_5	pooled_6	pooled_7	pooled_8	pooled_9	JK05	JK06	JK13	JK14	JK07	JK08	JK15	JK16	JK01	JK02	JK09	JK10	JK03	JK04	JK11	JK12
D-Glucose 6-phosphate 0	0	0	0	0	0	0	1.71028e+07	1.30307e+07	1.44001e+07	1.53294e+07	1.54444e+07	1.55407e+07	1.54178e+07	1.53433e+07	1.56748e+07	1.31191e+07	1.37966e+07	2.09456e+07	4.1834e+07	4.13221e+07	3.50869e+07	9.12759e+06	1.07035e+07	1.03031e+07	8.34713e+06	9.04337e+07	7.05192e+07	1.1808e+08	9.34385e+07	5.50377e+07	5.97141e+07	5.40201e+07	6.18306e+07
D-Glucose 6-phosphate 1	0	0	0	0	0	0	948197	505659	780795	820437	826347	810234	817831	902072	943758	635960	714291	1.18897e+06	2.3783e+06	2.36787e+06	2.10845e+06	301321	373843	330853	159857	6.09313e+06	4.31507e+06	7.99542e+06	6.15597e+06	3.26724e+06	3.67172e+06	3.27484e+06	3.9008e+06
D-Glucose 6-phosphate 2	0	0	0	0	0	0	0	0	0	0	0	0	0	0	0	0	0	0	0	0	0	0	0	0	0	0	0	0	0	0	0	0	0
D-Glucose 6-phosphate 3	0	0	0	0	0	0	757393	405255	549796	583971	483124	511418	462537	601548	578063	456617	510910	0	0	0	0	6.31326e+06	6.69859e+06	6.02478e+06	7.61359e+06	0	0	0	0	4.89149e+06	4.21787e+06	3.57171e+06	3.75533e+06
D-Glucose 6-phosphate 4	0	0	0	0	0	0	0	0	0	0	0	0	0	0	0	0	0	0	0	0	0	0	49310.9	0	50976.7	0	0	0	0	0	0	0	42910.7
D-Glucose 6-phosphate 5	0	0	0	0	0	0	0	0	0	0	0	0	0	0	0	0	0	0	0	0	0	228323	72390.2	244216	396839	0	0	0	0	0	0	0	0
D-Glucose 6-phosphate 6	0	0	0	0	0	0	891538	648344	771436	814401	933177	959463	875101	900515	949563	752356	830499	0	0	0	0	1.29833e+07	1.28527e+07	1.88976e+07	2.06581e+07	0	0	0	0	48334.3	69377.6	0	64498.5
Group: 2
D-Glucose 6-phosphate C6H13O9P	blank1r	blank2r	blank3r	blank4	blank5	blank6	pooled_1	pooled_10	pooled_11	pooled_2	pooled_3	pooled_4	pooled_5	pooled_6	pooled_7	pooled_8	pooled_9	JK05	JK06	JK13	JK14	JK07	JK08	JK15	JK16	JK01	JK02	JK09	JK10	JK03	JK04	JK11	JK12
D-Glucose 6-phosphate 0	0	0	0	0	0	0	5.58082e+06	4.15889e+06	4.95577e+06	5.05551e+06	5.13131e+06	5.20998e+06	5.07702e+06	5.00605e+06	5.45516e+06	4.27294e+06	4.67065e+06	4.23893e+06	1.25059e+07	1.29992e+07	1.07281e+07	4.77886e+06	5.42531e+06	5.99668e+06	4.53902e+06	2.48286e+07	1.75276e+07	3.4138e+07	3.11705e+07	2.09735e+07	2.29166e+07	2.22723e+07	2.35187e+07
D-Glucose 6-phosphate 1	0	0	0	0	0	0	280247	0	214049	181607	216696	249487	243801	235629	251438	110536	218061	158574	709018	674984	521184	210868	229034	277784	159857	1.57898e+06	1.03065e+06	2.4152e+06	1.98034e+06	1.24099e+06	1.53029e+06	1.36018e+06	1.5014e+06
D-Glucose 6-phosphate 2	0	0	0	0	0	0	0	0	0	0	0	0	0	0	0	0	0	0	0	0	0	0	0	0	0	0	0	0	0	0	0	0	0
D-Glucose 6-phosphate 3	0	0	0	0	0	0	170152	50190.6	86719.2	83648.7	57662	79175.9	50064.8	145704	105755	63183.2	70734	0	0	0	0	1.40728e+06	1.17965e+06	1.61064e+06	1.66052e+06	0	0	0	0	1.18762e+06	1.1715e+06	1.027e+06	885002
D-Glucose 6-phosphate 4	0	0	0	0	0	0	0	0	0	0	0	0	0	0	0	0	0	0	0	0	0	0	0	0	0	0	0	0	0	0	0	0	0
D-Glucose 6-phosphate 5	0	0	0	0	0	0	0	0	0	0	0	0	0	0	0	0	0	0	0	0	0	0	0	30479.3	0	0	0	0	0	0	0	0	0
D-Glucose 6-phosphate 6	0	0	0	0	0	0	88717.3	51722.6	115766	145156	120630	201122	113953	134163	140466	70243.2	109675	0	0	0	0	2.54065e+06	1.99278e+06	4.56625e+06	3.87233e+06	0	0	0	0	0	0	0	0
Metabolite: D-GLYCERATE	Formula: C3H6O4	Mass: 106.0266
-----------------------------------------------------------------------------
Group: 1
D-Glycerate C3H6O4	blank1r	blank2r	blank3r	blank4	blank5	blank6	pooled_1	pooled_10	pooled_11	pooled_2	pooled_3	pooled_4	pooled_5	pooled_6	pooled_7	pooled_8	pooled_9	JK05	JK06	JK13	JK14	JK07	JK08	JK15	JK16	JK01	JK02	JK09	JK10	JK03	JK04	JK11	JK12
D-Glycerate 0	9.45423e+07	8.31497e+06	3.93279e+06	1.85785e+06	1.91704e+06	1.81261e+06	2.65303e+07	2.62205e+07	2.52251e+07	2.60082e+07	2.63502e+07	2.57676e+07	2.61012e+07	2.67456e+07	2.62328e+07	2.65211e+07	2.63603e+07	1.10508e+08	7.18649e+07	9.09885e+07	7.9696e+07	1.65331e+07	2.03243e+07	1.40107e+07	1.40037e+07	9.41693e+07	9.17552e+07	1.77735e+08	1.4831e+08	9.87292e+07	1.0182e+08	1.01285e+08	9.66776e+07
D-Glycerate 1	3.30985e+06	0	19260.3	0	0	0	836986	755459	796116	792479	910174	794342	809895	782734	775805	748215	786774	3.51078e+06	2.31269e+06	2.9228e+06	2.68525e+06	521492	555107	386866	355626	2.92181e+06	2.91543e+06	5.8953e+06	4.8812e+06	3.20982e+06	3.38854e+06	3.24774e+06	3.19094e+06
D-Glycerate 2	0	0	0	0	0	0	43063	25000	25367.7	35623.7	37091.6	17625.5	0	31822.3	16903.1	0	24380.9	0	0	0	0	884704	1.04194e+06	1.1066e+06	967487	0	0	0	0	316179	267514	326186	316310
D-Glycerate 3	0	0	0	0	0	0	5.36397e+06	5.47081e+06	5.12261e+06	5.29951e+06	5.38461e+06	5.51849e+06	5.29402e+06	5.58054e+06	5.41396e+06	5.49857e+06	5.61705e+06	0	0	0	0	6.12264e+07	7.09843e+07	6.80913e+07	5.98247e+07	0	0	0	0	1.97424e+07	1.77919e+07	2.57468e+07	1.99901e+07
Metabolite: D-HISTIDINE	Formula: C6H9N3O2	Mass: 155.0695
-----------------------------------------------------------------------------
Group: 1
D-Histidine C6H9N3O2	blank1r	blank2r	blank3r	blank4	blank5	blank6	pooled_1	pooled_10	pooled_11	pooled_2	pooled_3	pooled_4	pooled_5	pooled_6	pooled_7	pooled_8	pooled_9	JK05	JK06	JK13	JK14	JK07	JK08	JK15	JK16	JK01	JK02	JK09	JK10	JK03	JK04	JK11	JK12
D-Histidine 0	0	0	254917	0	230221	256856	2.57629e+07	2.29174e+07	2.29305e+07	2.57401e+07	2.53779e+07	2.57865e+07	2.55783e+07	2.60988e+07	2.39018e+07	2.35522e+07	2.51737e+07	5.74483e+07	4.57347e+07	5.22006e+07	52449178	5.34496e+07	5.39409e+07	5.48868e+07	5.78056e+07	5.88406e+07	8.4461e+07	5.72482e+07	4.92797e+07	4.84141e+07	5.08783e+07	4.64587e+07	4.42897e+07
D-Histidine 1	0	0	0	0	0	0	1.54629e+06	1.35646e+06	1.3971e+06	1.42747e+06	1.57639e+06	1.46652e+06	1.57569e+06	1.49857e+06	1.44986e+06	1.39275e+06	1.53106e+06	3.31894e+06	2.59348e+06	3.57864e+06	3.25914e+06	3.28996e+06	3.33888e+06	3.44733e+06	3.67867e+06	3.46072e+06	5.38916e+06	3.63898e+06	3.106e+06	3.0138e+06	3.04216e+06	2.88391e+06	2.94705e+06
D-Histidine 2	0	0	0	0	0	0	0	0	0	0	0	0	0	0	0	0	0	0	0	0	0	0	0	0	0	0	0	0	0	0	0	0	0
D-Histidine 3	0	0	0	0	0	0	0	0	0	0	0	0	0	0	0	0	0	0	0	0	0	0	0	0	0	0	0	0	0	0	0	0	0
D-Histidine 4	0	0	0	0	0	0	0	0	0	0	0	0	0	0	0	0	0	0	0	0	0	0	0	0	0	0	0	0	0	0	0	0	0
D-Histidine 5	0	0	0	0	0	0	0	0	0	0	0	0	0	0	0	0	0	0	0	0	0	0	0	0	0	0	0	0	0	0	0	0	0
D-Histidine 6	0	0	0	0	0	0	0	0	0	0	0	0	0	0	0	0	0	0	0	0	0	0	0	0	0	0	0	0	0	0	0	0	0
Group: 2
D-Histidine C6H9N3O2	blank1r	blank2r	blank3r	blank4	blank5	blank6	pooled_1	pooled_10	pooled_11	pooled_2	pooled_3	pooled_4	pooled_5	pooled_6	pooled_7	pooled_8	pooled_9	JK05	JK06	JK13	JK14	JK07	JK08	JK15	JK16	JK01	JK02	JK09	JK10	JK03	JK04	JK11	JK12
D-Histidine 0	128562	135812	279550	263198	288655	309657	7.22984e+06	5.51122e+06	6.3708e+06	6.82633e+06	6.58649e+06	6.68145e+06	6.97397e+06	6.75302e+06	6863442	5.68427e+06	6.17069e+06	2.05453e+07	1.39187e+07	2.25135e+07	1.60206e+07	1.18275e+07	1.95712e+07	1.91003e+07	1.59227e+07	1.46396e+07	1.8468e+07	1.70257e+07	1.94874e+07	1.64391e+07	2.01205e+07	1.89181e+07	2.0053e+07
D-Histidine 1	0	0	0	0	0	0	189957	75189.9	86041.3	141495	141860	112540	101326	137389	169826	94860.8	86229.2	764852	164256	826338	423681	242112	847171	615902	523288	477637	710313	605406	633192	487612	570376	600769	712656
D-Histidine 2	0	0	0	0	0	0	0	0	0	0	0	0	0	0	0	0	0	0	0	0	0	0	0	0	0	0	0	0	0	0	0	0	0
D-Histidine 3	0	0	0	0	0	0	0	0	0	0	0	0	0	0	0	0	0	0	0	0	0	0	0	0	0	0	0	0	0	0	0	0	0
D-Histidine 4	0	0	0	0	0	0	0	0	0	0	0	0	0	0	0	0	0	0	0	0	0	0	0	0	0	0	0	0	0	0	0	0	0
D-Histidine 5	0	0	0	0	0	0	0	0	0	0	0	0	0	0	0	0	0	0	0	0	0	0	0	0	0	0	0	0	0	0	0	0	0
D-Histidine 6	0	0	0	0	0	0	0	0	0	0	0	0	0	0	0	0	0	0	0	0	0	0	0	0	0	0	0	0	0	0	0	0	0
Group: 3
D-Histidine C6H9N3O2	blank1r	blank2r	blank3r	blank4	blank5	blank6	pooled_1	pooled_10	pooled_11	pooled_2	pooled_3	pooled_4	pooled_5	pooled_6	pooled_7	pooled_8	pooled_9	JK05	JK06	JK13	JK14	JK07	JK08	JK15	JK16	JK01	JK02	JK09	JK10	JK03	JK04	JK11	JK12
D-Histidine 0	0	0	0	76390.3	82417.2	0	2.14322e+06	1.32951e+06	1.75786e+06	1.85661e+06	1.73489e+06	1.72949e+06	1.87192e+06	1.78754e+06	1.97979e+06	1.28758e+06	1.63136e+06	4.90898e+06	5.14188e+06	8.67208e+06	4.78911e+06	3358650	5.95557e+06	5.82977e+06	4.90382e+06	4.50777e+06	4.47626e+06	4.28821e+06	5.04311e+06	4.79089e+06	5.86522e+06	5.16917e+06	6.27812e+06
D-Histidine 1	0	0	0	0	0	0	24447.9	0	0	27674.8	0	0	0	23995	0	0	0	116879	80392.7	428776	122025	41892.1	207388	204842	86094.8	96286.2	74820.8	102564	163905	79666.2	152600	47235.9	207366
D-Histidine 2	0	0	0	0	0	0	0	0	0	0	0	0	0	0	0	0	0	0	0	0	0	0	0	0	0	0	0	0	0	0	0	0	0
D-Histidine 3	0	0	0	0	0	0	0	0	0	0	0	0	0	0	0	0	0	0	0	0	0	0	0	0	0	0	0	0	0	0	0	0	0
D-Histidine 4	0	0	0	0	0	0	0	0	0	0	0	0	0	0	0	0	0	0	0	0	0	0	0	0	0	0	0	0	0	0	0	0	0
D-Histidine 5	0	0	0	0	0	0	0	0	0	0	0	0	0	0	0	0	0	0	0	0	0	0	0	0	0	0	0	0	0	0	0	0	0
D-Histidine 6	0	0	0	0	0	0	0	0	0	0	0	0	0	0	0	0	0	0	0	0	0	0	0	0	0	0	0	0	0	0	0	0	0
Group: 4
D-Histidine C6H9N3O2	blank1r	blank2r	blank3r	blank4	blank5	blank6	pooled_1	pooled_10	pooled_11	pooled_2	pooled_3	pooled_4	pooled_5	pooled_6	pooled_7	pooled_8	pooled_9	JK05	JK06	JK13	JK14	JK07	JK08	JK15	JK16	JK01	JK02	JK09	JK10	JK03	JK04	JK11	JK12
D-Histidine 0	0	0	0	0	0	0	672816	1.15267e+06	1.07186e+06	879434	837299	861325	827333	935848	766768	1.25089e+06	1.24796e+06	3.24795e+06	2.01064e+06	2.8675e+06	2.83927e+06	2.57144e+06	2.34046e+06	2.91163e+06	3.07581e+06	2.60323e+06	2.73564e+06	3.08125e+06	3.1578e+06	2.85921e+06	3.05249e+06	3.50094e+06	2.42869e+06
D-Histidine 1	0	0	0	0	0	0	0	0	0	0	0	0	0	0	0	0	0	101423	21889.3	84552.9	72804.6	85056.6	52099	59731	129721	78983.4	73067	93097.9	103453	89484.5	101132	137044	50965.2
D-Histidine 2	0	0	0	0	0	0	0	0	0	0	0	0	0	0	0	0	0	0	0	0	0	0	0	0	0	0	0	0	0	0	0	0	0
D-Histidine 3	0	0	0	0	0	0	0	0	0	0	0	0	0	0	0	0	0	0	0	0	0	0	0	0	0	0	0	0	0	0	0	0	0
D-Histidine 4	0	0	0	0	0	0	0	0	0	0	0	0	0	0	0	0	0	0	0	0	0	0	0	0	0	0	0	0	0	0	0	0	0
D-Histidine 5	0	0	0	0	0	0	0	0	0	0	0	0	0	0	0	0	0	0	0	0	0	0	0	0	0	0	0	0	0	0	0	0	0
D-Histidine 6	0	0	0	0	0	0	0	0	0	0	0	0	0	0	0	0	0	0	0	0	0	0	0	0	0	0	0	0	0	0	0	0	0
Metabolite: D-MYO-INOSITOL 1,2-CYCLIC PHOSPHATE	Formula: C6H11O8P	Mass: 242.0192
-----------------------------------------------------------------------------
Group: 1
D-myo-Inositol 1,2-cyclic phosphate C6H11O8P	blank1r	blank2r	blank3r	blank4	blank5	blank6	pooled_1	pooled_10	pooled_11	pooled_2	pooled_3	pooled_4	pooled_5	pooled_6	pooled_7	pooled_8	pooled_9	JK05	JK06	JK13	JK14	JK07	JK08	JK15	JK16	JK01	JK02	JK09	JK10	JK03	JK04	JK11	JK12
D-myo-Inositol 1,2-cyclic phosphate 0	0	0	0	0	0	0	1.2448e+07	6.47159e+06	9.15942e+06	1.02086e+07	1.02633e+07	1.02022e+07	1.03546e+07	1.05451e+07	1.06732e+07	7.46314e+06	8.01438e+06	3.12723e+07	2.16549e+07	3.06832e+07	2.20273e+07	1.72426e+07	2.80185e+07	2.21356e+07	2.14087e+07	2.71112e+07	2.93542e+07	3.39889e+07	4.0739e+07	3.79165e+07	4.87285e+07	4.30054e+07	4.9804e+07
D-myo-Inositol 1,2-cyclic phosphate 1	0	0	0	0	0	0	765257	238040	432465	698010	622743	582321	666036	610207	623050	241805	387051	2.0086e+06	1.48471e+06	1.88388e+06	1.37822e+06	937657	1.86425e+06	1.36277e+06	1.27713e+06	1.70788e+06	1.83581e+06	2.16029e+06	2.52195e+06	2.35061e+06	3.07306e+06	2.8445e+06	3.28591e+06
D-myo-Inositol 1,2-cyclic phosphate 2	0	0	0	0	0	0	0	0	0	0	0	0	0	0	0	0	0	0	0	0	0	0	0	0	0	0	0	0	0	0	0	0	0
D-myo-Inositol 1,2-cyclic phosphate 3	0	0	0	0	0	0	0	0	0	0	0	0	0	0	0	0	0	0	0	0	0	0	0	0	0	0	0	0	0	0	0	0	0
D-myo-Inositol 1,2-cyclic phosphate 4	0	0	0	0	0	0	0	0	0	0	0	0	0	0	0	0	0	0	0	0	0	0	0	0	0	0	0	0	0	0	0	0	0
D-myo-Inositol 1,2-cyclic phosphate 5	0	0	0	0	0	0	0	0	0	0	0	0	0	0	0	0	0	0	0	0	0	0	0	0	0	0	0	0	0	0	0	0	0
D-myo-Inositol 1,2-cyclic phosphate 6	0	0	0	0	0	0	0	0	0	0	0	0	0	0	0	0	0	0	0	0	0	0	0	0	0	0	0	0	0	0	0	0	0
Metabolite: D-RIBOSE 5-PHOSPHATE	Formula: C5H11O8P	Mass: 230.0192
-----------------------------------------------------------------------------
Group: 1
D-Ribose 5-phosphate C5H11O8P	blank1r	blank2r	blank3r	blank4	blank5	blank6	pooled_1	pooled_10	pooled_11	pooled_2	pooled_3	pooled_4	pooled_5	pooled_6	pooled_7	pooled_8	pooled_9	JK05	JK06	JK13	JK14	JK07	JK08	JK15	JK16	JK01	JK02	JK09	JK10	JK03	JK04	JK11	JK12
D-Ribose 5-phosphate 0	0	0	0	0	0	0	2.49733e+06	1.76193e+06	2.08628e+06	2.13705e+06	2.16583e+06	2.04497e+06	2.15368e+06	2.19532e+06	2.01664e+06	1.81384e+06	1.89536e+06	1.55667e+07	6.72364e+06	1.29994e+07	5.87417e+06	6.23636e+06	9.55059e+06	3.01081e+06	3.85496e+06	5.78801e+06	4.56562e+06	5.55999e+06	6.31499e+06	1.01524e+07	1.14671e+07	1.10674e+07	8.96165e+06
D-Ribose 5-phosphate 1	0	0	0	0	0	0	31095.5	0	0	0	46275.5	43603.2	0	0	27272.9	0	0	541340	77147.6	335266	81533	83840.1	362592	0	67433.5	0	0	0	80985.1	289363	256768	327439	153984
D-Ribose 5-phosphate 2	0	0	0	0	0	0	0	0	0	0	0	0	0	0	0	0	0	0	0	0	0	271713	510970	0	167093	0	0	0	0	0	82022	134737	0
D-Ribose 5-phosphate 3	0	0	0	0	0	0	0	0	0	0	0	0	0	0	0	0	0	0	0	0	0	522330	838522	121745	268110	0	0	0	0	61958.9	96158.8	86088.3	51530.6
D-Ribose 5-phosphate 4	0	0	0	0	0	0	0	0	0	0	0	0	0	0	0	0	0	0	0	0	0	0	0	0	0	0	0	0	0	0	0	0	0
D-Ribose 5-phosphate 5	0	0	0	0	0	0	49554.6	0	51666.6	0	62155	45230.5	0	36265.7	72943.2	66663.6	60432.5	0	0	0	0	2.20297e+06	3.04095e+06	1.65472e+06	1.81854e+06	0	0	0	0	0	0	0	0
Metabolite: D-SORBITOL	Formula: C6H14O6	Mass: 182.079
-----------------------------------------------------------------------------
Group: 1
D-Sorbitol C6H14O6	blank1r	blank2r	blank3r	blank4	blank5	blank6	pooled_1	pooled_10	pooled_11	pooled_2	pooled_3	pooled_4	pooled_5	pooled_6	pooled_7	pooled_8	pooled_9	JK05	JK06	JK13	JK14	JK07	JK08	JK15	JK16	JK01	JK02	JK09	JK10	JK03	JK04	JK11	JK12
D-Sorbitol 0	687263	169654	438467	321312	311640	354019	1.10606e+07	1.13417e+07	1.11481e+07	1.09453e+07	1.04242e+07	1.09606e+07	1.07247e+07	1.07175e+07	1.01071e+07	1.15167e+07	1.12565e+07	1.57124e+07	2.13778e+07	1.97058e+07	1.35876e+07	1.64623e+07	1.48805e+07	2.17858e+07	1.6561e+07	1.19311e+07	1.09642e+07	1.23995e+07	1.34274e+07	1.03115e+07	9.7117e+06	1.18606e+07	9.77255e+06
D-Sorbitol 1	0	0	0	0	0	0	611040	579260	538868	541100	600448	522691	590790	495570	422375	550783	600883	604189	1.21116e+06	997505	598114	785276	531987	1.13841e+06	759432	671886	463166	503075	525112	392815	398882	410453	294313
D-Sorbitol 2	0	0	0	0	0	0	0	0	0	0	0	0	0	0	0	0	0	0	0	0	0	0	0	0	0	0	0	0	0	0	0	0	0
D-Sorbitol 3	0	0	0	0	0	0	0	0	0	0	0	0	0	0	0	0	0	0	0	0	0	0	0	0	0	0	0	0	0	0	0	0	0
D-Sorbitol 4	0	0	0	0	0	0	0	0	0	0	0	0	0	0	0	0	0	0	0	0	0	0	0	0	0	0	0	0	0	0	0	0	0
D-Sorbitol 5	0	0	0	0	0	0	0	0	0	0	0	0	0	0	0	0	0	0	0	0	0	0	0	0	0	0	0	0	0	0	0	0	0
D-Sorbitol 6	0	0	0	0	0	0	0	0	0	0	0	0	0	0	0	0	0	0	0	0	0	0	0	0	0	0	0	0	0	0	0	0	0
Metabolite: D-XYLONOLACTONE	Formula: C5H8O5	Mass: 148.0372
-----------------------------------------------------------------------------
Group: 1
D-Xylonolactone C5H8O5	blank1r	blank2r	blank3r	blank4	blank5	blank6	pooled_1	pooled_10	pooled_11	pooled_2	pooled_3	pooled_4	pooled_5	pooled_6	pooled_7	pooled_8	pooled_9	JK05	JK06	JK13	JK14	JK07	JK08	JK15	JK16	JK01	JK02	JK09	JK10	JK03	JK04	JK11	JK12
D-Xylonolactone 0	3.20995e+06	1.3237e+06	1.88204e+06	1.60765e+06	1.63331e+06	1.70593e+06	1.11247e+08	6.28397e+07	7.10565e+07	9.164e+07	89548313	9.12563e+07	9.2374e+07	9.50733e+07	9.14793e+07	6.50027e+07	7.60599e+07	5.45785e+08	5.5626e+08	8.26955e+08	4.94553e+08	3.60267e+08	4.5451e+08	3.8058e+08	4.97709e+08	3.67378e+08	1.70463e+08	6.37614e+08	5.28249e+08	6.40349e+08	8.33859e+08	6.10726e+08	6.53162e+08
D-Xylonolactone 1	37650.8	0	0	16776	25552.7	0	6.02955e+06	3.46019e+06	3.76866e+06	4.78405e+06	5.00752e+06	4.88604e+06	5.06468e+06	5.28424e+06	4.90179e+06	3.52329e+06	4.00196e+06	3.04025e+07	3.1105e+07	4.60688e+07	2.74622e+07	1.98728e+07	2.50197e+07	2.16001e+07	2.79539e+07	2.03231e+07	9.48164e+06	3.53269e+07	3.01015e+07	3.56764e+07	4.56083e+07	3.3558e+07	3.49488e+07
D-Xylonolactone 2	0	0	0	0	0	0	609799	304669	430172	524054	556598	523999	549912	559966	491817	391612	358505	479292	301870	503529	325921	6.22816e+06	9.16685e+06	5436096	8.6838e+06	201410	0	441792	366226	6.21439e+06	9.96675e+06	7.06344e+06	7.3294e+06
D-Xylonolactone 3	0	0	0	0	0	0	0	0	0	0	0	0	0	39531.3	38010.9	0	0	0	0	0	0	1.0595e+06	1.80998e+06	987416	1.41749e+06	0	0	0	0	1.12133e+06	2.09606e+06	1.4774e+06	1.30651e+06
D-Xylonolactone 4	288859	0	0	0	0	0	103802	0	0	93792.3	60330.5	93351.2	72806.6	78545.5	95652.6	0	82010.8	0	0	0	0	2.17632e+06	2.9667e+06	2.32209e+06	3.62643e+06	0	0	0	0	521527	610373	486663	505731
D-Xylonolactone 5	0	0	0	0	0	0	0	0	0	0	0	0	0	0	0	0	0	0	0	0	0	476296	630866	309526	511159	0	0	0	0	70962	0	0	0
Group: 2
D-Xylonolactone C5H8O5	blank1r	blank2r	blank3r	blank4	blank5	blank6	pooled_1	pooled_10	pooled_11	pooled_2	pooled_3	pooled_4	pooled_5	pooled_6	pooled_7	pooled_8	pooled_9	JK05	JK06	JK13	JK14	JK07	JK08	JK15	JK16	JK01	JK02	JK09	JK10	JK03	JK04	JK11	JK12
D-Xylonolactone 0	6.46816e+06	1.22406e+06	1.70693e+06	1.39928e+06	1.50361e+06	1.33994e+06	3.07496e+06	2.77248e+06	2.40865e+06	3.46603e+06	3.12534e+06	3.08811e+06	3.25141e+06	3.12928e+06	2.96216e+06	3.00791e+06	3.00245e+06	4.24161e+06	3.74634e+06	4.23274e+06	3.95645e+06	3.82576e+06	4.21764e+06	4.05722e+06	4.24943e+06	3.63919e+06	4.00932e+06	4.05483e+06	3.97738e+06	3.89447e+06	4.03737e+06	3.97428e+06	4.00067e+06
D-Xylonolactone 1	82035.9	0	0	0	0	0	91953.8	56674.2	33882.2	39931.9	54763.6	41375.9	56422	51782.6	49833.3	39568.1	41351.2	74535.4	60603.4	105076	65890.7	70724.2	78961.8	64743.8	49299.7	74349.4	90756.8	97443.4	89758	73551.9	80800.6	79568.3	64904.3
D-Xylonolactone 2	0	0	0	0	0	0	0	0	0	0	0	0	0	0	0	0	0	0	0	0	0	0	0	0	0	0	0	0	0	0	0	0	0
D-Xylonolactone 3	0	0	0	0	0	0	0	0	0	0	0	0	0	0	0	0	0	0	0	0	0	0	0	0	0	0	0	0	0	0	0	0	0
D-Xylonolactone 4	286457	0	0	0	0	0	0	0	0	0	0	0	0	0	0	0	0	0	0	0	0	0	0	0	0	0	0	0	0	0	0	0	0
D-Xylonolactone 5	0	0	0	0	0	0	0	0	0	0	0	0	0	0	0	0	0	0	0	0	0	0	0	0	0	0	0	0	0	0	0	0	0
Group: 3
D-Xylonolactone C5H8O5	blank1r	blank2r	blank3r	blank4	blank5	blank6	pooled_1	pooled_10	pooled_11	pooled_2	pooled_3	pooled_4	pooled_5	pooled_6	pooled_7	pooled_8	pooled_9	JK05	JK06	JK13	JK14	JK07	JK08	JK15	JK16	JK01	JK02	JK09	JK10	JK03	JK04	JK11	JK12
D-Xylonolactone 0	5.71894e+06	859808	1.26108e+06	1255664	1.08899e+06	1.10911e+06	2.50059e+06	2.05199e+06	1.78514e+06	2.35484e+06	2.24836e+06	2.26249e+06	2.15711e+06	2.11967e+06	2.22769e+06	2.12484e+06	2.05046e+06	2.6389e+06	2.88395e+06	2.65023e+06	2.40616e+06	2.53015e+06	2.42767e+06	2.84724e+06	2.46537e+06	2.70364e+06	2.72459e+06	2.44083e+06	2.34835e+06	2.54478e+06	2.6229e+06	2.40255e+06	2.43395e+06
D-Xylonolactone 1	61296.7	0	0	0	0	0	0	0	0	0	19251	0	24002.4	0	0	0	0	0	0	21590.3	0	16744.4	0	0	0	0	22000.4	0	0	0	0	0	0
D-Xylonolactone 2	0	0	0	0	0	0	0	0	0	0	0	0	0	0	0	0	0	0	0	0	0	0	0	0	0	0	0	0	0	0	0	0	0
D-Xylonolactone 3	0	0	0	0	0	0	112232	127971	160988	121959	124452	158705	132311	143288	153452	142900	155442	330555	421367	463019	336506	309598	271210	445832	384168	492750	442549	449657	519991	293813	441204	426431	499664
D-Xylonolactone 4	277738	0	0	0	0	0	0	0	0	0	0	0	0	0	0	0	0	0	0	0	0	0	0	0	0	0	24948.3	0	24658.2	0	0	0	0
D-Xylonolactone 5	0	0	0	0	0	0	26816.7	0	0	0	0	0	0	0	0	0	0	0	0	0	0	0	0	0	0	0	0	0	0	0	0	0	0
Group: 4
D-Xylonolactone C5H8O5	blank1r	blank2r	blank3r	blank4	blank5	blank6	pooled_1	pooled_10	pooled_11	pooled_2	pooled_3	pooled_4	pooled_5	pooled_6	pooled_7	pooled_8	pooled_9	JK05	JK06	JK13	JK14	JK07	JK08	JK15	JK16	JK01	JK02	JK09	JK10	JK03	JK04	JK11	JK12
D-Xylonolactone 0	1.68455e+06	188437	271104	269297	253965	237746	942139	659697	555118	941049	712701	816174	704316	789528	885766	658583	594653	743563	776400	744177	790935	918625	885851	927395	784656	783437	988922	821595	870647	831382	912417	767826	934595
D-Xylonolactone 1	0	0	0	0	0	0	0	0	0	0	0	0	0	0	0	0	0	0	0	0	0	0	0	0	0	0	0	0	0	0	0	0	0
D-Xylonolactone 2	0	0	0	0	0	0	0	0	0	0	0	0	0	0	0	0	0	0	0	0	0	0	0	0	0	0	0	0	0	0	0	0	0
D-Xylonolactone 3	0	0	0	0	0	0	0	0	0	0	0	0	0	0	0	0	0	0	0	0	0	0	0	0	0	0	0	0	0	0	0	0	0
D-Xylonolactone 4	282772	0	0	0	0	0	0	0	0	0	0	0	0	0	0	0	0	0	0	0	0	0	0	0	0	0	0	0	0	0	0	0	0
D-Xylonolactone 5	0	111443	99983.2	39711.2	42427.4	57138.8	0	0	0	0	0	0	0	0	0	0	0	0	0	0	0	0	0	0	0	0	0	0	0	0	0	0	0
Metabolite: D-XYLULOSE	Formula: C5H10O5	Mass: 150.0528
-----------------------------------------------------------------------------
Group: 1
D-Xylulose C5H10O5	blank1r	blank2r	blank3r	blank4	blank5	blank6	pooled_1	pooled_10	pooled_11	pooled_2	pooled_3	pooled_4	pooled_5	pooled_6	pooled_7	pooled_8	pooled_9	JK05	JK06	JK13	JK14	JK07	JK08	JK15	JK16	JK01	JK02	JK09	JK10	JK03	JK04	JK11	JK12
D-Xylulose 0	125778	65586	105595	297748	425291	348004	494612	274437	218129	519502	472850	428324	446601	387678	418948	367573	322394	715103	809537	854917	525584	590396	708698	826711	713859	479141	490552	587605	536014	638157	649036	552722	535409
D-Xylulose 1	0	0	0	0	0	0	0	0	0	0	0	0	0	0	0	0	0	0	0	0	0	0	0	0	0	0	0	0	0	0	0	0	0
D-Xylulose 2	0	0	0	0	0	0	0	0	0	0	0	0	0	0	0	0	0	0	0	0	0	0	0	0	0	0	0	0	0	0	0	0	0
D-Xylulose 3	0	0	0	0	0	0	0	0	0	0	0	0	0	0	0	0	0	0	0	0	0	0	0	0	0	0	0	0	0	0	0	0	0
D-Xylulose 4	0	0	0	0	0	0	0	0	0	0	0	0	0	0	0	0	0	0	0	0	0	0	0	0	0	0	0	0	0	0	0	0	0
D-Xylulose 5	85391.1	0	16667.2	14968.2	39709.6	19893.3	77077.4	393991	287432	138199	192794	141416	156771	147029	247851	409603	382473	468367	286721	230207	537785	480023	213835	458196	595781	436048	480047	364590	442675	408741	411476	370503	257318
Group: 2
D-Xylulose C5H10O5	blank1r	blank2r	blank3r	blank4	blank5	blank6	pooled_1	pooled_10	pooled_11	pooled_2	pooled_3	pooled_4	pooled_5	pooled_6	pooled_7	pooled_8	pooled_9	JK05	JK06	JK13	JK14	JK07	JK08	JK15	JK16	JK01	JK02	JK09	JK10	JK03	JK04	JK11	JK12
D-Xylulose 0	183966	64853.3	60237.5	527897	526861	554129	2.20546e+06	1.99339e+06	1.51613e+06	2.14601e+06	1.85962e+06	1.96797e+06	2.03011e+06	1.98968e+06	1.73358e+06	1.91241e+06	2.00979e+06	3.00941e+06	4.38201e+06	3.94461e+06	2.28164e+06	3.31386e+06	3.19946e+06	5.00966e+06	2.88945e+06	2.27231e+06	2.39417e+06	1.67141e+06	1.96634e+06	1.6437e+06	2.20779e+06	2.08365e+06	1.88592e+06
D-Xylulose 1	0	0	0	0	0	0	0	0	0	0	0	0	0	0	0	0	0	0	0	0	0	0	0	0	0	0	0	0	0	0	0	0	0
D-Xylulose 2	0	0	0	0	0	0	0	0	0	0	0	0	0	0	0	0	0	0	0	0	0	0	0	0	0	0	0	0	0	0	0	0	0
D-Xylulose 3	0	0	0	0	0	0	0	0	0	0	0	0	0	0	0	0	0	0	0	0	0	0	0	0	0	0	0	0	0	0	0	0	0
D-Xylulose 4	0	0	0	0	0	0	0	0	0	0	0	0	0	0	0	0	0	0	0	0	0	0	0	0	0	0	0	0	0	0	0	0	0
D-Xylulose 5	197693	219017	486255	365615	428064	473197	3.13686e+07	2.75572e+07	2.7393e+07	3.08268e+07	3.06859e+07	3.11266e+07	3.07475e+07	3.14553e+07	2.91976e+07	2.79058e+07	2.9989e+07	7.3609e+07	5.6031e+07	6.71444e+07	6.45796e+07	6.26614e+07	6.86098e+07	6.83324e+07	6.95711e+07	7.15974e+07	1.01013e+08	7.16093e+07	6.68388e+07	6.3072e+07	6.69277e+07	6.3079e+07	6.107e+07
Group: 3
D-Xylulose C5H10O5	blank1r	blank2r	blank3r	blank4	blank5	blank6	pooled_1	pooled_10	pooled_11	pooled_2	pooled_3	pooled_4	pooled_5	pooled_6	pooled_7	pooled_8	pooled_9	JK05	JK06	JK13	JK14	JK07	JK08	JK15	JK16	JK01	JK02	JK09	JK10	JK03	JK04	JK11	JK12
D-Xylulose 0	87320	49273.4	124611	375021	376898	340034	747218	588647	405314	612996	708441	672511	653633	677589	627024	567904	502222	1.11303e+06	977208	1.3453e+06	749961	751947	1.03819e+06	1.02538e+06	830434	799452	717694	881306	976772	832380	996208	912568	819422
D-Xylulose 1	0	0	0	0	0	0	0	0	0	0	0	0	0	0	0	0	0	0	0	0	0	0	0	0	0	0	0	0	0	0	0	0	0
D-Xylulose 2	0	0	0	0	0	0	0	0	0	0	0	0	0	0	0	0	0	0	0	0	0	0	0	0	0	0	0	0	0	0	0	0	0
D-Xylulose 3	0	0	0	0	0	0	0	0	0	0	0	0	0	0	0	0	0	0	0	0	0	0	0	0	0	0	0	0	0	0	0	0	0
D-Xylulose 4	0	0	0	0	0	0	0	0	0	0	0	0	0	0	0	0	0	0	0	0	0	0	0	0	0	0	0	0	0	0	0	0	0
D-Xylulose 5	67415.4	0	0	0	0	0	23929.3	135983	106164	24016.2	44494.2	36342.4	55187.1	43543	99483.7	232312	134066	74491.8	23761.2	41641.6	119465	250491	117532	210378	318832	136799	121563	65483.1	154430	166067	96955.1	117633	56800
Group: 4
D-Xylulose C5H10O5	blank1r	blank2r	blank3r	blank4	blank5	blank6	pooled_1	pooled_10	pooled_11	pooled_2	pooled_3	pooled_4	pooled_5	pooled_6	pooled_7	pooled_8	pooled_9	JK05	JK06	JK13	JK14	JK07	JK08	JK15	JK16	JK01	JK02	JK09	JK10	JK03	JK04	JK11	JK12
D-Xylulose 0	40854.3	0	0	310674	279498	284672	739799	0	209846	490036	412769	506391	436598	462604	482903	146287	261335	437397	667765	548356	343142	295104	792760	483130	284956	1.33088e+06	1.6397e+06	975331	1.57012e+06	1.46351e+06	2.19792e+06	1.54646e+06	1.96283e+06
D-Xylulose 1	0	0	0	0	0	0	0	0	0	0	0	0	0	0	0	0	0	0	0	0	0	0	0	0	0	0	0	0	0	0	0	0	0
D-Xylulose 2	0	0	0	0	0	0	0	0	0	0	0	0	0	0	0	0	0	0	0	0	0	0	0	0	0	0	0	0	0	0	0	0	0
D-Xylulose 3	0	0	0	0	0	0	0	0	0	0	0	0	0	0	0	0	0	0	0	0	0	0	0	0	0	0	0	0	0	0	0	0	0
D-Xylulose 4	0	0	0	0	0	0	0	0	0	0	0	0	0	0	0	0	0	0	0	0	0	0	0	0	0	0	0	0	0	0	0	0	0
D-Xylulose 5	55802.5	41705.4	93688.7	112352	109358	122434	3.99049e+06	2.45255e+06	3.05974e+06	3.37198e+06	3.38499e+06	3.21938e+06	3.48111e+06	3.25361e+06	3.77419e+06	2.46245e+06	2.88224e+06	1.10696e+07	8.4864e+06	1.37166e+07	9.09036e+06	6.31434e+06	1.19357e+07	1.13065e+07	9.52197e+06	8.66459e+06	9.78565e+06	8.66791e+06	1.09633e+07	9.48628e+06	1.15228e+07	1.0668e+07	1.16352e+07
Metabolite: DEMETHYL-PHOSPHINOTHRICIN	Formula: C4H10NO4P	Mass: 167.0347
-----------------------------------------------------------------------------
Group: 1
demethyl-phosphinothricin C4H10NO4P	blank1r	blank2r	blank3r	blank4	blank5	blank6	pooled_1	pooled_10	pooled_11	pooled_2	pooled_3	pooled_4	pooled_5	pooled_6	pooled_7	pooled_8	pooled_9	JK05	JK06	JK13	JK14	JK07	JK08	JK15	JK16	JK01	JK02	JK09	JK10	JK03	JK04	JK11	JK12
demethyl-phosphinothricin 0	0	0	0	0	0	0	0	0	0	0	0	0	0	0	0	0	0	246762	180890	0	322412	95775.2	281126	202878	401841	581524	476274	298296	402294	367291	447543	317651	293054
demethyl-phosphinothricin 1	0	0	0	0	0	0	0	0	0	0	0	0	0	0	0	0	0	0	0	0	0	0	0	0	0	0	0	0	0	0	0	0	0
demethyl-phosphinothricin 2	0	0	0	0	0	0	0	0	0	0	0	0	0	0	0	0	0	0	0	0	0	0	0	0	0	0	0	0	0	0	0	0	0
demethyl-phosphinothricin 3	0	0	0	0	0	0	0	0	0	0	0	0	0	0	0	0	0	0	0	0	0	0	0	0	0	0	0	0	0	0	0	0	0
demethyl-phosphinothricin 4	0	0	0	0	0	0	0	0	0	0	0	0	0	0	0	0	0	0	0	0	0	0	0	0	0	0	0	0	0	0	0	0	0
Metabolite: DEOXYCYTIDINE	Formula: C9H13N3O4	Mass: 227.0906
-----------------------------------------------------------------------------
Group: 1
Deoxycytidine C9H13N3O4	blank1r	blank2r	blank3r	blank4	blank5	blank6	pooled_1	pooled_10	pooled_11	pooled_2	pooled_3	pooled_4	pooled_5	pooled_6	pooled_7	pooled_8	pooled_9	JK05	JK06	JK13	JK14	JK07	JK08	JK15	JK16	JK01	JK02	JK09	JK10	JK03	JK04	JK11	JK12
Deoxycytidine 0	0	0	0	0	0	0	30743.8	0	0	25376.9	34872.7	43397.2	39796.6	36224.1	35166.1	31279.1	37094.6	419274	229531	263952	211365	174079	257176	198553	229773	328368	289243	300344	309558	325898	356922	323089	310618
Deoxycytidine 1	0	0	0	0	0	0	0	0	0	0	0	0	0	0	0	0	0	0	0	0	0	0	0	0	0	0	0	0	0	0	0	0	0
Deoxycytidine 2	0	0	0	0	0	0	0	0	0	0	0	0	0	0	0	0	0	0	0	0	0	0	0	0	0	0	0	0	0	0	0	0	0
Deoxycytidine 3	0	0	0	0	0	0	0	0	0	0	0	0	0	0	0	0	0	0	0	0	0	0	0	0	0	0	0	0	0	0	0	0	0
Deoxycytidine 4	0	0	0	0	0	0	0	0	0	0	0	0	0	0	0	0	0	0	0	0	0	0	0	0	0	0	0	0	0	0	0	0	0
Deoxycytidine 5	0	0	0	0	0	0	0	0	0	0	0	0	0	0	0	0	0	0	0	0	0	0	0	0	0	0	0	0	0	0	0	0	0
Deoxycytidine 6	0	0	0	0	0	0	0	0	0	0	0	0	0	0	0	0	0	0	0	0	0	0	0	0	0	0	0	0	0	0	0	0	0
Deoxycytidine 7	0	0	0	0	0	0	0	0	0	0	0	0	0	0	0	0	0	0	0	0	0	0	0	0	0	0	0	0	0	0	0	0	0
Deoxycytidine 8	0	0	0	0	0	0	0	0	0	0	0	0	0	0	0	0	0	0	0	0	0	0	0	0	0	0	0	0	0	0	0	0	0
Deoxycytidine 9	0	0	0	0	0	0	0	0	0	0	0	0	0	0	0	0	0	0	0	0	0	0	0	0	0	0	0	0	0	0	0	0	0
Metabolite: DGDP	Formula: C10H15N5O10P2	Mass: 427.0294
-----------------------------------------------------------------------------
Group: 1
dGDP C10H15N5O10P2	blank1r	blank2r	blank3r	blank4	blank5	blank6	pooled_1	pooled_10	pooled_11	pooled_2	pooled_3	pooled_4	pooled_5	pooled_6	pooled_7	pooled_8	pooled_9	JK05	JK06	JK13	JK14	JK07	JK08	JK15	JK16	JK01	JK02	JK09	JK10	JK03	JK04	JK11	JK12
dGDP 0	0	0	0	0	0	0	908331	1.00873e+06	633553	1.02607e+06	988874	1.09e+06	1.04731e+06	1.00611e+06	1.08386e+06	967227	940697	1.99598e+06	4.1384e+06	5.04529e+06	4.99745e+06	2.51514e+06	2.19818e+06	2.86498e+06	2.78467e+06	3.26212e+06	2.73532e+06	5.00595e+06	3.24176e+06	5.44776e+06	5.46959e+06	5.17389e+06	4.87666e+06
dGDP 1	0	0	0	0	0	0	36104.5	0	0	0	36085.1	0	0	26853.1	40146.6	0	0	51170.6	206359	419700	309611	191513	106573	125587	150115	99204.5	162493	300899	178761	507822	357573	450261	321083
dGDP 2	0	0	0	0	0	0	0	0	0	0	0	0	0	0	0	0	0	0	0	0	0	121373	86604.7	169040	100981	0	0	0	0	64494.3	0	0	0
dGDP 3	0	0	0	0	0	0	0	0	0	0	0	0	0	0	0	0	0	0	0	0	0	0	0	116554	185797	0	0	0	0	0	0	0	0
dGDP 4	0	0	0	0	0	0	0	0	0	0	0	0	0	0	0	0	0	0	0	0	0	0	0	0	0	0	0	0	0	0	0	0	0
dGDP 5	0	0	0	0	0	0	0	0	0	0	0	0	0	0	0	0	0	0	0	0	0	663120	575952	1.45256e+06	1.51677e+06	0	0	0	0	0	0	0	0
dGDP 6	0	0	0	0	0	0	0	0	0	0	0	0	0	0	0	0	0	0	0	0	0	0	0	0	0	0	0	0	0	0	0	0	0
dGDP 7	0	0	0	0	0	0	0	0	0	0	0	0	0	0	0	0	0	0	0	0	0	0	0	0	0	0	0	0	0	0	0	0	0
dGDP 8	0	0	0	0	0	0	0	0	0	0	0	0	0	0	0	0	0	0	0	0	0	0	0	0	0	0	0	0	0	0	0	0	0
dGDP 9	0	0	0	0	0	0	0	0	0	0	0	0	0	0	0	0	0	0	0	0	0	0	0	0	0	0	0	0	0	0	0	0	0
dGDP 10	0	0	0	0	0	0	0	0	0	0	0	0	0	0	0	0	0	0	0	0	0	0	0	0	0	0	0	0	0	0	0	0	0
Group: 2
dGDP C10H15N5O10P2	blank1r	blank2r	blank3r	blank4	blank5	blank6	pooled_1	pooled_10	pooled_11	pooled_2	pooled_3	pooled_4	pooled_5	pooled_6	pooled_7	pooled_8	pooled_9	JK05	JK06	JK13	JK14	JK07	JK08	JK15	JK16	JK01	JK02	JK09	JK10	JK03	JK04	JK11	JK12
dGDP 0	0	0	0	0	0	0	6.58924e+06	6.07301e+06	6.0802e+06	6.4543e+06	6.46587e+06	6.62817e+06	6.52692e+06	6.69334e+06	6.62347e+06	6.2978e+06	6.19353e+06	3.08817e+07	1.68744e+07	3.00517e+07	2.17153e+07	1.36057e+07	1.34506e+07	1.0621e+07	1.39894e+07	1.61536e+07	1.17312e+07	1.36437e+07	1.6877e+07	2.92018e+07	3.43701e+07	3.31321e+07	2.90518e+07
dGDP 1	0	0	0	0	0	0	651558	578661	560536	539080	611135	476895	603223	544183	689746	552205	578867	3.01959e+06	1.72357e+06	2.97648e+06	2.35336e+06	1.28939e+06	1.25049e+06	987437	1.20939e+06	1.68175e+06	1.13562e+06	1.20061e+06	1.43667e+06	2.74933e+06	3.49155e+06	3.40678e+06	3.01798e+06
dGDP 2	0	0	0	0	0	0	107911	136456	70933.9	149966	81790.6	125595	83762.2	126045	156595	145599	136609	0	0	0	0	1.16984e+06	1.23398e+06	1.02889e+06	1.33976e+06	0	0	0	0	1.25538e+06	1.11873e+06	1.50041e+06	1.05598e+06
dGDP 3	0	0	0	0	0	0	64236.4	74232	75243.9	65654.3	59985.8	55622.7	43583.2	100835	128464	110071	116461	0	0	0	0	1.30311e+06	1.35486e+06	990347	1.57237e+06	0	0	0	0	823645	1.00368e+06	938676	932917
dGDP 4	0	0	0	0	0	0	0	0	0	0	0	0	0	0	0	0	0	0	0	0	0	0	67388.8	96546.6	179153	0	0	0	0	0	0	0	0
dGDP 5	0	0	0	0	0	0	246907	220742	280226	226819	225580	259024	263979	228195	246629	254260	274822	0	0	0	0	4.18173e+06	3.66876e+06	5.62352e+06	6.13563e+06	0	0	0	0	152676	204649	144161	94648
dGDP 6	0	0	0	0	0	0	0	0	0	0	0	0	0	0	0	0	0	0	0	0	0	125339	0	135156	168594	0	0	0	0	0	0	0	0
dGDP 7	0	0	0	0	0	0	0	0	0	0	0	0	0	0	0	0	0	0	0	0	0	0	0	0	0	0	0	0	0	0	0	0	0
dGDP 8	0	0	0	0	0	0	0	0	0	0	0	0	0	0	0	0	0	0	0	0	0	0	0	0	0	0	0	0	0	0	0	0	0
dGDP 9	0	0	0	0	0	0	0	0	0	0	0	0	0	0	0	0	0	0	0	0	0	0	0	0	0	0	0	0	0	0	0	0	0
dGDP 10	0	0	0	0	0	0	0	0	0	0	0	0	0	0	0	0	0	0	0	0	0	0	0	0	0	0	0	0	0	0	0	0	0
Metabolite: DGMP	Formula: C10H14N5O7P	Mass: 347.0631
-----------------------------------------------------------------------------
Group: 1
dGMP C10H14N5O7P	blank1r	blank2r	blank3r	blank4	blank5	blank6	pooled_1	pooled_10	pooled_11	pooled_2	pooled_3	pooled_4	pooled_5	pooled_6	pooled_7	pooled_8	pooled_9	JK05	JK06	JK13	JK14	JK07	JK08	JK15	JK16	JK01	JK02	JK09	JK10	JK03	JK04	JK11	JK12
dGMP 0	0	0	0	0	0	0	3.70171e+06	3.73907e+06	3.50498e+06	3.80241e+06	3.6249e+06	3.67586e+06	3.61162e+06	3.69732e+06	3.70915e+06	3.75737e+06	3.73063e+06	4.76949e+07	6.16026e+06	1.33122e+07	7.95133e+06	8.61121e+06	1.09674e+07	3.0501e+06	5.82821e+06	5.83757e+06	4.6178e+06	4.23759e+06	6.00095e+06	1.4702e+07	1.69454e+07	1.75419e+07	1.33432e+07
dGMP 1	0	0	0	0	0	0	261061	312531	333337	308767	258670	278947	241675	370601	305953	276769	345246	4.97836e+06	578625	1.28891e+06	801690	765568	1.11771e+06	217630	504916	457192	399478	348998	603623	1.41927e+06	1.60677e+06	1.68956e+06	1.2557e+06
dGMP 2	0	0	0	0	0	0	25016.8	28259.2	0	49026.3	24852.1	37932.5	0	0	16126	28440.4	23850.5	0	0	0	0	707206	843498	183756	404249	0	0	0	0	462093	462495	528189	439638
dGMP 3	0	0	0	0	0	0	0	29598	38658.5	27135	21592.9	21093.5	27071.3	22355.5	0	16924.7	23711.7	0	0	0	0	863710	998439	258629	553965	0	0	0	0	379729	437354	507450	268568
dGMP 4	0	0	0	0	0	0	0	0	0	0	0	0	0	0	0	0	0	0	0	0	0	62181.9	95857.8	0	27245.9	0	0	0	0	0	0	0	0
dGMP 5	0	0	0	0	0	0	101128	146138	108928	119194	116428	108718	132464	121776	87795.7	111420	119747	0	0	0	0	3.06039e+06	3.41084e+06	1.54784e+06	2.75362e+06	0	0	0	0	76976.5	115933	101557	48985.4
dGMP 6	0	0	0	0	0	0	0	0	0	0	0	0	0	0	0	0	0	0	0	0	0	50821.6	97255.4	0	24827.6	0	0	0	0	0	0	0	0
dGMP 7	0	0	0	0	0	0	0	0	0	0	0	0	0	0	0	0	0	0	0	0	0	0	0	0	0	0	0	0	0	0	0	0	0
dGMP 8	0	0	0	0	0	0	0	0	0	0	0	0	0	0	0	0	0	0	0	0	0	0	0	0	0	0	0	0	0	0	0	0	0
dGMP 9	0	0	0	0	0	0	0	0	0	0	0	0	0	0	0	0	0	0	0	0	0	0	0	0	0	0	0	0	0	0	0	0	0
dGMP 10	0	0	0	0	0	0	0	0	0	0	0	0	0	0	0	0	0	0	0	0	0	0	0	0	0	0	0	0	0	0	0	0	0
Metabolite: DGTP	Formula: C10H16N5O13P3	Mass: 506.9957
-----------------------------------------------------------------------------
Group: 1
dGTP C10H16N5O13P3	blank1r	blank2r	blank3r	blank4	blank5	blank6	pooled_1	pooled_10	pooled_11	pooled_2	pooled_3	pooled_4	pooled_5	pooled_6	pooled_7	pooled_8	pooled_9	JK05	JK06	JK13	JK14	JK07	JK08	JK15	JK16	JK01	JK02	JK09	JK10	JK03	JK04	JK11	JK12
dGTP 0	0	0	0	0	0	0	1.26625e+07	1.03222e+07	7.62672e+06	1.17226e+07	1.1507e+07	1.13719e+07	1.18352e+07	1.16291e+07	1.19482e+07	1.10589e+07	1.07735e+07	1.90871e+07	4.48795e+07	5.61238e+07	5.03224e+07	2.54134e+07	2.4137e+07	3.02284e+07	2.91007e+07	3.99134e+07	2.99544e+07	4.7195e+07	3.43711e+07	5.38237e+07	5.76363e+07	4.86411e+07	5.25229e+07
dGTP 1	0	0	0	0	0	0	1.36439e+06	1.11653e+06	735287	1.2541e+06	1.31961e+06	1.34609e+06	1.25534e+06	1.22433e+06	1.34267e+06	1.25097e+06	1.20595e+06	2.20633e+06	5.22464e+06	6.3136e+06	5.5968e+06	2.92035e+06	2.71104e+06	3.46171e+06	3.20991e+06	4.45031e+06	3.33079e+06	5.43939e+06	3.89182e+06	6.08006e+06	6.70456e+06	5.57198e+06	6.08454e+06
dGTP 2	0	0	0	0	0	0	417833	177003	173363	456430	383952	320567	335052	235384	483501	193395	325845	0	233900	0	0	2.6413e+06	2.47836e+06	3.29041e+06	2.96793e+06	336916	0	253707	107105	3.20139e+06	3.09324e+06	2.72858e+06	2.88981e+06
dGTP 3	0	0	0	0	0	0	265990	174732	132981	275609	209786	243270	220723	250975	250311	185895	209966	0	0	0	0	2.64461e+06	2.4121e+06	3.3026e+06	3.42321e+06	0	0	0	0	1.88462e+06	2.05379e+06	1.52355e+06	1.50791e+06
dGTP 4	0	0	0	0	0	0	0	0	0	0	0	0	0	0	0	0	0	0	0	0	0	297324	172890	556163	433764	0	0	0	0	0	0	0	0
dGTP 5	0	0	0	0	0	0	672732	507541	358378	634777	621529	620493	623703	605945	664509	625770	547927	0	0	0	0	7.9525e+06	6.60198e+06	1.57797e+07	1.40289e+07	0	0	0	0	702068	592543	625290	519497
dGTP 6	0	0	0	0	0	0	0	0	0	0	0	0	0	0	0	0	0	0	0	0	0	309256	178371	696537	586442	0	0	0	0	0	0	0	0
dGTP 7	0	0	0	0	0	0	0	0	0	0	0	0	0	0	0	0	0	0	0	0	0	0	0	0	0	0	0	0	0	0	0	0	0
dGTP 8	0	0	0	0	0	0	0	0	0	0	0	0	0	0	0	0	0	0	0	0	0	0	0	0	0	0	0	0	0	0	0	0	0
dGTP 9	0	0	0	0	0	0	0	0	0	0	0	0	0	0	0	0	0	0	0	0	0	0	0	0	0	0	0	0	0	0	0	0	0
dGTP 10	0	0	0	0	0	0	0	0	0	0	0	0	0	0	0	0	0	0	0	0	0	0	0	0	0	0	0	0	0	0	0	0	0
Metabolite: DTDP	Formula: C10H16N2O11P2	Mass: 402.0229
-----------------------------------------------------------------------------
Group: 1
dTDP C10H16N2O11P2	blank1r	blank2r	blank3r	blank4	blank5	blank6	pooled_1	pooled_10	pooled_11	pooled_2	pooled_3	pooled_4	pooled_5	pooled_6	pooled_7	pooled_8	pooled_9	JK05	JK06	JK13	JK14	JK07	JK08	JK15	JK16	JK01	JK02	JK09	JK10	JK03	JK04	JK11	JK12
dTDP 0	0	0	0	0	0	0	165397	88199.7	100767	130069	169400	157656	124159	102311	61570.9	85600.3	115439	1.39128e+06	282637	653713	419201	251057	500182	235929	487355	241339	134355	176958	476316	681154	1.00975e+06	704408	842685
dTDP 1	0	0	0	0	0	0	0	0	0	0	0	0	0	0	0	0	0	0	0	0	0	0	0	0	0	0	0	0	0	0	0	0	0
dTDP 2	0	0	0	0	0	0	0	0	0	0	0	0	0	0	0	0	0	0	0	0	0	0	0	0	0	0	0	0	0	0	0	0	0
dTDP 3	0	0	0	0	0	0	0	0	0	0	0	0	0	0	0	0	0	0	0	0	0	0	0	0	0	0	0	0	0	0	0	0	0
dTDP 4	0	0	0	0	0	0	0	0	0	0	0	0	0	0	0	0	0	0	0	0	0	0	0	0	0	0	0	0	0	0	0	0	0
dTDP 5	0	0	0	0	0	0	0	0	0	0	0	0	0	0	0	0	0	0	0	0	0	0	0	0	0	0	0	0	0	0	0	0	0
dTDP 6	0	0	0	0	0	0	0	0	0	0	0	0	0	0	0	0	0	0	0	0	0	0	0	0	0	0	0	0	0	0	0	0	0
dTDP 7	0	0	0	0	0	0	0	0	0	0	0	0	0	0	0	0	0	0	0	0	0	0	0	0	0	0	0	0	0	0	0	0	0
dTDP 8	0	0	0	0	0	0	0	0	0	0	0	0	0	0	0	0	0	0	0	0	0	0	0	0	0	0	0	0	0	0	0	0	0
dTDP 9	0	0	0	0	0	0	0	0	0	0	0	0	0	0	0	0	0	0	0	0	0	0	0	0	0	0	0	0	0	0	0	0	0
dTDP 10	0	0	0	0	0	0	0	0	0	0	0	0	0	0	0	0	0	0	0	0	0	0	0	0	0	0	0	0	0	0	0	0	0
Metabolite: DTMP	Formula: C10H15N2O8P	Mass: 322.0566
-----------------------------------------------------------------------------
Group: 1
dTMP C10H15N2O8P	blank1r	blank2r	blank3r	blank4	blank5	blank6	pooled_1	pooled_10	pooled_11	pooled_2	pooled_3	pooled_4	pooled_5	pooled_6	pooled_7	pooled_8	pooled_9	JK05	JK06	JK13	JK14	JK07	JK08	JK15	JK16	JK01	JK02	JK09	JK10	JK03	JK04	JK11	JK12
dTMP 0	0	0	0	0	0	0	491446	498273	499560	460730	507168	516564	497744	572329	590037	559983	458737	1.9879e+06	1.07017e+06	1.73626e+06	1.35537e+06	1.34334e+06	1.56238e+06	1.20935e+06	1.30179e+06	2.23279e+06	2.38433e+06	3.29433e+06	2.60629e+06	2.11862e+06	2.60009e+06	2.46947e+06	2.46505e+06
dTMP 1	0	0	0	0	0	0	0	0	0	0	0	0	0	0	0	0	0	85589.5	0	67763	0	45095.4	31450.3	23624.1	41560.7	84827.6	135497	242007	131118	164310	106517	199770	171082
dTMP 2	0	0	0	0	0	0	0	0	0	0	0	0	0	0	0	0	0	0	0	0	0	0	0	0	0	0	0	0	0	31951.8	0	64050.3	84992.4
dTMP 3	0	0	0	0	0	0	0	0	0	0	0	0	0	0	0	0	0	0	0	0	0	0	0	0	0	0	0	0	0	0	0	0	0
dTMP 4	0	0	0	0	0	0	0	0	0	0	0	0	0	0	0	0	0	0	0	0	0	0	0	0	0	0	0	0	0	0	0	0	0
dTMP 5	0	0	0	0	0	0	0	0	0	0	0	0	0	0	0	0	0	0	0	0	0	0	0	0	0	0	0	0	0	0	0	0	0
dTMP 6	0	0	0	0	0	0	0	0	0	0	0	0	0	0	0	0	0	0	0	0	0	0	0	0	0	0	0	0	0	0	0	0	0
dTMP 7	0	0	0	0	0	0	0	0	0	0	0	0	0	0	0	0	0	0	0	0	0	0	0	0	0	0	0	0	0	0	0	0	0
dTMP 8	0	0	0	0	0	0	0	0	0	0	0	0	0	0	0	0	0	0	0	0	0	0	0	0	0	0	0	0	0	0	0	0	0
dTMP 9	0	0	0	0	0	0	0	0	0	0	0	0	0	0	0	0	0	0	0	0	0	0	0	0	0	0	0	0	0	0	0	0	0
dTMP 10	0	0	0	0	0	0	0	0	0	0	0	0	0	0	0	0	0	0	0	0	0	0	0	0	0	0	0	0	0	0	0	0	0
Metabolite: DTTP	Formula: C10H17N2O14P3	Mass: 481.9893
-----------------------------------------------------------------------------
Group: 1
dTTP C10H17N2O14P3	blank1r	blank2r	blank3r	blank4	blank5	blank6	pooled_1	pooled_10	pooled_11	pooled_2	pooled_3	pooled_4	pooled_5	pooled_6	pooled_7	pooled_8	pooled_9	JK05	JK06	JK13	JK14	JK07	JK08	JK15	JK16	JK01	JK02	JK09	JK10	JK03	JK04	JK11	JK12
dTTP 0	0	0	0	0	0	0	514932	455174	373838	498319	409925	413343	377184	493593	495340	364998	425706	867586	1.62626e+06	2.09767e+06	1.90747e+06	1.50814e+06	1.25186e+06	1.70043e+06	1.69238e+06	1.58249e+06	1.08579e+06	2.08346e+06	1.62184e+06	2.49486e+06	2.61814e+06	2.14582e+06	2.06465e+06
dTTP 1	0	0	0	0	0	0	0	0	0	0	0	0	0	0	0	0	0	0	0	0	0	0	0	0	0	0	0	0	0	91805.9	0	110903	0
dTTP 2	0	0	0	0	0	0	0	0	0	0	0	0	0	0	0	0	0	0	0	0	0	0	0	0	0	0	0	0	0	0	0	0	0
dTTP 3	0	0	0	0	0	0	0	0	0	0	0	0	0	0	0	0	0	0	0	0	0	0	0	0	0	0	0	0	0	0	0	0	0
dTTP 4	0	0	0	0	0	0	0	0	0	0	0	0	0	0	0	0	0	0	0	0	0	0	0	0	0	0	0	0	0	0	0	0	0
dTTP 5	0	0	0	0	0	0	0	0	0	0	0	0	0	0	0	0	0	0	0	0	0	0	0	0	0	0	0	0	0	0	0	0	0
dTTP 6	0	0	0	0	0	0	0	0	0	0	0	0	0	0	0	0	0	0	0	0	0	0	0	0	0	0	0	0	0	0	0	0	0
dTTP 7	0	0	0	0	0	0	0	0	0	0	0	0	0	0	0	0	0	0	0	0	0	0	0	0	0	0	0	0	0	0	0	0	0
dTTP 8	0	0	0	0	0	0	0	0	0	0	0	0	0	0	0	0	0	0	0	0	0	0	0	0	0	0	0	0	0	0	0	0	0
dTTP 9	0	0	0	0	0	0	0	0	0	0	0	0	0	0	0	0	0	0	0	0	0	0	0	0	0	0	0	0	0	0	0	0	0
dTTP 10	0	0	0	0	0	0	0	0	0	0	0	0	0	0	0	0	0	0	0	0	0	0	0	0	0	0	0	0	0	0	0	0	0
Metabolite: ETHANOLAMINE PHOSPHATE	Formula: C2H8NO4P	Mass: 141.0191
-----------------------------------------------------------------------------
Group: 1
Ethanolamine phosphate C2H8NO4P	blank1r	blank2r	blank3r	blank4	blank5	blank6	pooled_1	pooled_10	pooled_11	pooled_2	pooled_3	pooled_4	pooled_5	pooled_6	pooled_7	pooled_8	pooled_9	JK05	JK06	JK13	JK14	JK07	JK08	JK15	JK16	JK01	JK02	JK09	JK10	JK03	JK04	JK11	JK12
Ethanolamine phosphate 0	0	0	0	0	0	0	1.23724e+06	1.22746e+06	1.2871e+06	1.15056e+06	1.20715e+06	1.29012e+06	1.33588e+06	1.36882e+06	1.34574e+06	1.25345e+06	1.32665e+06	2.59341e+06	2.25335e+06	3.99889e+06	3.51601e+06	2.18437e+06	2.31991e+06	3.19968e+06	3.88638e+06	4.51049e+06	4.32095e+06	5.4633e+06	5.02735e+06	6.47211e+06	5.84332e+06	6.89567e+06	6.83844e+06
Ethanolamine phosphate 1	0	0	0	0	0	0	0	0	0	0	0	0	0	0	0	0	0	0	0	0	0	0	0	0	0	0	0	0	0	0	0	0	0
Ethanolamine phosphate 2	0	0	0	0	0	0	0	0	0	0	0	0	0	0	0	0	0	0	0	0	0	0	0	0	0	0	0	0	0	0	0	0	0
Metabolite: GAMMAGLUTAMYLGLUTAMICACID	Formula: C10H16N2O7	Mass: 276.0958
-----------------------------------------------------------------------------
Group: 1
GammaGlutamylglutamicacid C10H16N2O7	blank1r	blank2r	blank3r	blank4	blank5	blank6	pooled_1	pooled_10	pooled_11	pooled_2	pooled_3	pooled_4	pooled_5	pooled_6	pooled_7	pooled_8	pooled_9	JK05	JK06	JK13	JK14	JK07	JK08	JK15	JK16	JK01	JK02	JK09	JK10	JK03	JK04	JK11	JK12
GammaGlutamylglutamicacid 0	0	0	0	0	0	0	108729	0	143768	81858.9	112894	77437.4	114007	96235.7	82481.2	65626.6	72336	349777	359284	493867	353329	239291	526469	247893	314860	481242	602242	576352	737941	766632	1.07204e+06	725315	756329
GammaGlutamylglutamicacid 1	0	0	0	0	0	0	0	0	0	0	0	0	0	0	0	0	0	0	0	0	0	0	0	0	0	0	0	0	0	0	0	0	0
GammaGlutamylglutamicacid 2	0	0	0	0	0	0	0	0	0	0	0	0	0	0	0	0	0	0	0	0	0	0	0	0	0	0	0	0	0	0	0	0	0
GammaGlutamylglutamicacid 3	0	0	0	0	0	0	0	0	0	0	0	0	0	0	0	0	0	0	0	0	0	0	0	0	0	0	0	0	0	0	0	0	0
GammaGlutamylglutamicacid 4	0	0	0	0	0	0	0	0	0	0	0	0	0	0	0	0	0	0	0	0	0	0	0	0	0	0	0	0	0	0	0	0	0
GammaGlutamylglutamicacid 5	0	0	0	0	0	0	0	0	0	0	0	0	0	0	0	0	0	0	0	0	0	0	0	0	0	0	0	0	0	0	0	0	0
GammaGlutamylglutamicacid 6	0	0	0	0	0	0	0	0	0	0	0	0	0	0	273626	0	0	0	0	0	0	0	0	0	0	0	0	0	0	0	0	0	0
GammaGlutamylglutamicacid 7	0	0	0	0	0	0	0	0	0	0	0	0	0	0	0	0	0	0	0	0	0	0	0	0	0	0	0	0	0	0	0	0	0
GammaGlutamylglutamicacid 8	0	0	0	0	0	0	0	0	0	0	0	0	0	0	0	0	0	0	0	0	0	0	0	0	0	0	0	0	0	0	0	0	0
GammaGlutamylglutamicacid 9	0	0	0	0	0	0	0	0	0	0	0	0	0	0	0	0	0	0	0	0	0	0	0	0	0	0	0	0	0	0	0	0	0
GammaGlutamylglutamicacid 10	0	0	0	0	0	0	0	0	0	0	0	0	0	0	0	0	0	0	0	0	0	0	0	0	0	0	0	0	0	0	0	0	0
Metabolite: GDP	Formula: C10H15N5O11P2	Mass: 443.0243
-----------------------------------------------------------------------------
Group: 1
GDP C10H15N5O11P2	blank1r	blank2r	blank3r	blank4	blank5	blank6	pooled_1	pooled_10	pooled_11	pooled_2	pooled_3	pooled_4	pooled_5	pooled_6	pooled_7	pooled_8	pooled_9	JK05	JK06	JK13	JK14	JK07	JK08	JK15	JK16	JK01	JK02	JK09	JK10	JK03	JK04	JK11	JK12
GDP 0	0	0	0	0	0	0	1.54923e+06	642154	1.09738e+06	1.29786e+06	1.35783e+06	1.32201e+06	1.36926e+06	1.39567e+06	1.49538e+06	835311	951211	3.94762e+06	4.29875e+06	5.69674e+06	4.31597e+06	2.30042e+06	2.9591e+06	2.46759e+06	2.73057e+06	4.31916e+06	3.26891e+06	3.19166e+06	4.16733e+06	5.20441e+06	6.6933e+06	5.34652e+06	6.38834e+06
GDP 1	0	0	0	0	0	0	85693.1	0	43057.7	44382.5	34577.5	44289.3	34687.8	61763.5	67362.6	0	0	229427	352654	587841	190593	0	231969	88042.1	70793	404545	168599	184038	242287	433599	556974	395140	657166
GDP 2	0	0	0	0	0	0	0	0	0	0	0	0	0	0	0	0	0	0	0	0	0	0	186692	150806	115411	0	0	0	0	78938.5	121936	0	236963
GDP 3	0	0	0	0	0	0	0	0	0	0	0	0	0	0	0	0	0	0	0	0	0	0	177276	81979.5	81825.6	0	0	0	0	0	31725	0	81332.7
GDP 4	0	0	0	0	0	0	0	0	0	0	0	0	0	0	0	0	0	0	0	0	0	0	0	0	0	0	0	0	0	0	0	0	0
GDP 5	0	0	0	0	0	0	33070.5	0	0	0	0	0	0	0	0	0	0	0	0	0	0	455096	749020	1.11175e+06	1.0834e+06	0	0	0	0	0	0	0	0
GDP 6	0	0	0	0	0	0	0	0	0	0	0	0	0	0	0	0	0	0	0	0	0	0	0	0	0	0	0	0	0	0	0	0	0
GDP 7	0	0	0	0	0	0	0	0	0	0	0	0	0	0	0	0	0	0	0	0	0	0	0	0	0	0	0	0	0	0	0	0	0
GDP 8	0	0	0	0	0	0	0	0	0	0	0	0	0	0	0	0	0	0	0	0	0	0	0	0	0	0	0	0	0	0	0	0	0
GDP 9	0	0	0	0	0	0	0	0	0	0	0	0	0	0	0	0	0	0	0	0	0	0	0	0	0	0	0	0	0	0	0	0	0
GDP 10	0	0	0	0	0	0	0	0	0	0	0	0	0	0	0	0	0	0	0	0	0	0	0	0	0	0	0	0	0	0	0	0	0
Metabolite: GLUTATHIONE	Formula: C10H17N3O6S	Mass: 307.0838
-----------------------------------------------------------------------------
Group: 1
Glutathione C10H17N3O6S	blank1r	blank2r	blank3r	blank4	blank5	blank6	pooled_1	pooled_10	pooled_11	pooled_2	pooled_3	pooled_4	pooled_5	pooled_6	pooled_7	pooled_8	pooled_9	JK05	JK06	JK13	JK14	JK07	JK08	JK15	JK16	JK01	JK02	JK09	JK10	JK03	JK04	JK11	JK12
Glutathione 0	0	0	0	0	0	0	607742	901275	1.12267e+06	641329	714164	913464	762509	840504	1.18619e+06	1.18994e+06	1.24657e+06	4.6807e+06	2.40461e+06	2.42207e+06	2.86235e+06	7.00746e+06	5.41827e+06	2.91522e+06	3.31547e+06	2.24091e+06	2.9882e+06	4.68691e+06	4.30451e+06	9.35682e+06	5.3713e+06	6.23158e+06	9.28719e+06
Glutathione 1	0	0	0	0	0	0	0	0	0	0	0	0	0	0	32477.7	0	0	147730	0	0	0	356198	122761	61738.3	76455.2	0	55373.6	98549.5	0	413954	89317	265992	507227
Glutathione 2	0	0	0	0	0	0	0	0	0	0	0	0	0	0	0	0	0	0	0	0	0	0	0	0	0	0	0	0	0	0	0	0	0
Glutathione 3	0	0	0	0	0	0	0	0	0	0	0	0	0	0	0	0	0	0	0	0	0	0	0	0	0	0	0	0	0	0	0	0	0
Glutathione 4	0	0	0	0	0	0	0	0	0	0	0	0	0	0	0	0	0	0	0	0	0	0	0	0	0	0	0	0	0	0	0	0	0
Glutathione 5	0	0	0	0	0	0	0	0	0	0	0	0	0	0	0	0	0	0	0	0	0	0	0	0	0	0	0	0	0	0	0	0	0
Glutathione 6	0	0	0	0	0	0	0	0	0	0	0	0	0	0	0	0	0	0	0	0	0	0	0	0	0	0	0	0	0	0	0	0	0
Glutathione 7	0	0	0	0	0	0	0	0	0	0	0	0	0	0	0	0	0	0	0	0	0	0	0	0	0	0	0	0	0	0	0	0	0
Glutathione 8	0	0	0	0	0	0	0	0	0	0	0	0	0	0	0	0	0	0	0	0	0	0	0	0	0	0	0	0	0	0	0	0	0
Glutathione 9	0	0	0	0	0	0	0	0	0	0	0	0	0	0	0	0	0	0	0	0	0	0	0	0	0	0	0	0	0	0	0	0	0
Glutathione 10	0	0	0	0	0	0	0	0	0	0	0	0	0	0	0	0	0	0	0	0	0	0	0	0	0	0	0	0	0	0	0	0	0
Metabolite: GLYCEROL 2-PHOSPHATE	Formula: C3H9O6P	Mass: 172.0137
-----------------------------------------------------------------------------
Group: 1
Glycerol 2-phosphate C3H9O6P	blank1r	blank2r	blank3r	blank4	blank5	blank6	pooled_1	pooled_10	pooled_11	pooled_2	pooled_3	pooled_4	pooled_5	pooled_6	pooled_7	pooled_8	pooled_9	JK05	JK06	JK13	JK14	JK07	JK08	JK15	JK16	JK01	JK02	JK09	JK10	JK03	JK04	JK11	JK12
Glycerol 2-phosphate 0	0	0	0	0	0	0	1.92566e+08	1.71304e+08	1.7769e+08	1.87081e+08	1.84712e+08	1.87296e+08	1.86077e+08	1.88062e+08	1.80931e+08	1.75679e+08	1.79453e+08	8.36586e+08	4.64934e+08	7.78679e+08	5.83247e+08	2.89316e+08	3.45088e+08	2.43969e+08	2.51142e+08	4.79341e+08	3.87274e+08	1.1119e+09	1.09645e+09	6.85214e+08	8.49237e+08	8.86813e+08	9.93801e+08
Glycerol 2-phosphate 1	0	0	0	0	0	0	6.11628e+06	5.48492e+06	5.77122e+06	6.18986e+06	6.18479e+06	6.01655e+06	6.22217e+06	5.97527e+06	6.05408e+06	5.7535e+06	5.9818e+06	2.76163e+07	1.49775e+07	2.55492e+07	1.88429e+07	9.45805e+06	1.11073e+07	7.85152e+06	8.55438e+06	1.58573e+07	1.27517e+07	3.69174e+07	3.64327e+07	2.26376e+07	2.82385e+07	2.95678e+07	3.327e+07
Glycerol 2-phosphate 2	0	0	0	0	0	0	0	0	0	0	0	0	0	0	0	0	0	0	0	0	0	3.32801e+06	3.7369e+06	4.24477e+06	4.27777e+06	0	0	0	0	0	0	0	0
Glycerol 2-phosphate 3	0	0	0	0	0	0	2.73407e+07	2.45804e+07	2.54533e+07	2.67598e+07	2.66479e+07	2.63154e+07	2.6462e+07	2.60696e+07	2.58689e+07	2.52344e+07	2.55017e+07	0	0	0	0	2.75641e+08	3.085e+08	2.90289e+08	3.02488e+08	0	0	0	0	9.12843e+07	1.07844e+08	9.42012e+07	9.34962e+07
Group: 2
Glycerol 2-phosphate C3H9O6P	blank1r	blank2r	blank3r	blank4	blank5	blank6	pooled_1	pooled_10	pooled_11	pooled_2	pooled_3	pooled_4	pooled_5	pooled_6	pooled_7	pooled_8	pooled_9	JK05	JK06	JK13	JK14	JK07	JK08	JK15	JK16	JK01	JK02	JK09	JK10	JK03	JK04	JK11	JK12
Glycerol 2-phosphate 0	0	0	0	0	0	0	1.1053e+08	1.09096e+08	112200944	1.09666e+08	1.04686e+08	1.10016e+08	1.11329e+08	1.10983e+08	111166972	1.09613e+08	1.1155e+08	4.81e+08	319661860	3.91632e+08	3.57865e+08	2.49014e+08	2.75871e+08	2.02151e+08	2.10606e+08	2.49367e+08	257798474	4.87599e+08	4.20145e+08	3.38595e+08	3.90061e+08	3.84108e+08	4.01717e+08
Glycerol 2-phosphate 1	0	0	0	0	0	0	3.47547e+06	3.46519e+06	3.71212e+06	3.60141e+06	3.51014e+06	3.54887e+06	3.66684e+06	3.47865e+06	3.76603e+06	3.60912e+06	3.77774e+06	1.57741e+07	1.03939e+07	1.27577e+07	1.1714e+07	8.20601e+06	8.90304e+06	6.48791e+06	7.25893e+06	8.25937e+06	8.57904e+06	1.61538e+07	1.37261e+07	1.13743e+07	1.25675e+07	1.26702e+07	1.36933e+07
Glycerol 2-phosphate 2	0	0	0	0	0	0	0	0	0	0	0	0	0	0	0	0	0	0	0	0	0	1.38172e+06	1.56351e+06	1.7339e+06	1.9166e+06	0	0	0	0	0	0	0	0
Glycerol 2-phosphate 3	0	0	0	0	0	0	1.56714e+07	1.567e+07	1.61838e+07	1.56628e+07	1.51302e+07	1.55932e+07	1.59528e+07	1.5462e+07	1.60047e+07	1.59476e+07	1.59342e+07	0	0	0	0	1.50995e+08	153487097	1.39267e+08	1.55683e+08	0	0	0	0	6.69012e+07	7.87026e+07	6.49805e+07	6.21063e+07
Metabolite: GLYCERONE PHOSPHATE	Formula: C3H7O6P	Mass: 169.998
-----------------------------------------------------------------------------
Group: 1
Glycerone phosphate C3H7O6P	blank1r	blank2r	blank3r	blank4	blank5	blank6	pooled_1	pooled_10	pooled_11	pooled_2	pooled_3	pooled_4	pooled_5	pooled_6	pooled_7	pooled_8	pooled_9	JK05	JK06	JK13	JK14	JK07	JK08	JK15	JK16	JK01	JK02	JK09	JK10	JK03	JK04	JK11	JK12
Glycerone phosphate 0	0	0	0	0	0	0	4.86376e+06	3.29831e+06	4.02351e+06	4.15751e+06	4.15645e+06	4.22282e+06	4.12985e+06	4.31523e+06	4.14118e+06	3.50087e+06	3.87431e+06	1.11387e+07	1.43823e+07	2.18292e+07	1.54615e+07	2.97371e+06	6.07969e+06	3.11539e+06	2.88794e+06	3.60523e+07	2.83021e+07	3.30775e+07	3.00543e+07	2.63301e+07	3.08288e+07	2.75706e+07	3.11468e+07
Glycerone phosphate 1	0	0	0	0	0	0	0	0	61784.5	0	36804.6	0	57713.8	0	0	0	65131.5	60652.5	0	234760	220025	0	0	0	0	1.08634e+06	599710	660097	681859	676557	408068	490185	730214
Glycerone phosphate 2	1.0669e+06	983611	1.72973e+06	1.38515e+06	1.32299e+06	1.29088e+06	1.27543e+06	346137	523204	800116	790607	845527	776727	880452	663970	344784	374821	666044	679369	813183	904034	575521	1.14673e+06	1.0122e+06	739195	675836	952799	688399	708562	862577	611175	597748	868135
Glycerone phosphate 3	0	0	0	0	0	0	755671	487429	526609	620053	653078	746599	575630	555207	588405	488208	590646	0	0	0	0	9.4458e+06	1.36059e+07	1.36366e+07	1.08369e+07	0	0	0	0	1.73939e+06	1.83527e+06	1.79935e+06	1.76394e+06
Group: 2
Glycerone phosphate C3H7O6P	blank1r	blank2r	blank3r	blank4	blank5	blank6	pooled_1	pooled_10	pooled_11	pooled_2	pooled_3	pooled_4	pooled_5	pooled_6	pooled_7	pooled_8	pooled_9	JK05	JK06	JK13	JK14	JK07	JK08	JK15	JK16	JK01	JK02	JK09	JK10	JK03	JK04	JK11	JK12
Glycerone phosphate 0	0	0	0	0	0	0	931270	1.03601e+06	991111	1.03701e+06	1.10546e+06	979402	926926	937715	1.05394e+06	1.30423e+06	993323	171019	2.49117e+06	2.82856e+06	2.15331e+06	0	251311	0	0	7.83288e+06	6.18777e+06	1.00946e+07	5.56631e+06	6.79232e+06	5.4006e+06	4.89107e+06	3.30539e+06
Glycerone phosphate 1	0	0	0	0	0	0	0	0	0	0	0	0	0	0	0	0	0	0	0	0	0	0	0	0	0	0	0	0	0	0	0	0	0
Glycerone phosphate 2	321309	440870	732518	663008	733101	691756	523003	0	247541	528506	399571	412588	462387	425224	400563	0	130179	146771	464090	409812	228410	122946	397341	334608	204367	226996	159202	0	213828	130965	148548	172512	551731
Glycerone phosphate 3	0	0	0	0	0	0	28249	0	0	35192.7	0	50386	48581.7	25693.2	57922.2	0	0	0	0	0	0	1.50097e+06	1.15076e+06	1.89196e+06	1.31236e+06	0	0	0	0	0	0	0	0
Metabolite: GLYCEROPHOSPHOGLYCEROL	Formula: C6H15O8P	Mass: 246.0505
-----------------------------------------------------------------------------
Group: 1
Glycerophosphoglycerol C6H15O8P	blank1r	blank2r	blank3r	blank4	blank5	blank6	pooled_1	pooled_10	pooled_11	pooled_2	pooled_3	pooled_4	pooled_5	pooled_6	pooled_7	pooled_8	pooled_9	JK05	JK06	JK13	JK14	JK07	JK08	JK15	JK16	JK01	JK02	JK09	JK10	JK03	JK04	JK11	JK12
Glycerophosphoglycerol 0	0	0	0	0	0	0	1.00058e+07	9.23922e+06	7.28174e+06	1.01308e+07	9.7181e+06	9.2302e+06	9.26141e+06	9.64341e+06	9.36191e+06	8.99995e+06	9.48035e+06	8.53223e+07	5.09867e+07	1.09325e+08	8.0432e+07	4.03938e+06	5.10402e+06	3.10547e+06	3.23797e+06	5.46941e+07	6.36843e+07	7.86035e+07	8.51382e+07	2.99374e+07	3.30414e+07	4.00098e+07	3.71073e+07
Glycerophosphoglycerol 1	0	0	0	0	0	0	568345	528391	363803	573797	568008	537701	534934	508209	542358	565595	531154	5.64844e+06	3.41002e+06	7.02561e+06	5.23277e+06	135516	196397	78800.4	118027	3.41611e+06	4.11168e+06	4.91867e+06	5.65695e+06	1.88908e+06	1.95785e+06	2.45012e+06	2.35324e+06
Glycerophosphoglycerol 2	0	0	0	0	0	0	0	0	0	0	0	0	0	0	0	0	0	0	0	0	0	340324	453328	489486	344267	0	0	0	0	613805	441387	781072	796112
Glycerophosphoglycerol 3	0	0	0	0	0	0	3.62725e+06	3.44616e+06	2.69929e+06	3.71448e+06	3.54015e+06	3.48117e+06	3.71523e+06	3.60006e+06	3.4745e+06	3.38196e+06	3.49563e+06	0	0	0	0	2.88533e+07	3.55824e+07	3.82476e+07	3.22947e+07	0	0	0	0	5.25361e+07	4.96548e+07	6.48883e+07	5.59093e+07
Glycerophosphoglycerol 4	0	0	0	0	0	0	37675.2	30817	19602.1	24843.5	36592.8	0	38836.9	48130.9	22088.1	30876.3	33943.2	0	0	0	0	859505	1.05815e+06	1.10676e+06	1.04377e+06	0	0	0	0	1.67539e+06	1.58525e+06	2.05351e+06	1.73254e+06
Glycerophosphoglycerol 5	0	0	0	0	0	0	0	0	0	0	0	0	0	0	0	0	0	0	0	0	0	427158	629045	817071	718897	0	0	0	0	0	0	0	0
Glycerophosphoglycerol 6	0	0	0	0	0	0	1.50087e+06	1.43789e+06	1.11457e+06	1.63281e+06	1.5985e+06	1.53219e+06	1.44083e+06	1.56175e+06	1.54672e+06	1.34497e+06	1.54961e+06	0	0	0	0	2.05625e+07	2.51011e+07	2.96969e+07	2.62745e+07	0	0	0	0	1.26834e+07	1.2857e+07	1.62185e+07	1.34194e+07
Group: 2
Glycerophosphoglycerol C6H15O8P	blank1r	blank2r	blank3r	blank4	blank5	blank6	pooled_1	pooled_10	pooled_11	pooled_2	pooled_3	pooled_4	pooled_5	pooled_6	pooled_7	pooled_8	pooled_9	JK05	JK06	JK13	JK14	JK07	JK08	JK15	JK16	JK01	JK02	JK09	JK10	JK03	JK04	JK11	JK12
Glycerophosphoglycerol 0	0	0	0	0	0	0	1.9914e+06	1.22647e+06	1.71303e+06	1.76819e+06	1.61785e+06	1.92331e+06	1.8637e+06	1.97651e+06	1.81471e+06	1.42716e+06	1.57647e+06	1.00249e+07	1.27043e+07	1.42309e+07	1.38436e+07	2.13107e+06	2.27508e+06	1.96389e+06	3.13553e+06	2.48867e+06	2.07262e+06	2.50409e+06	2.21673e+06	1.80624e+06	1.89837e+06	1.27449e+06	1.22995e+06
Glycerophosphoglycerol 1	0	0	0	0	0	0	0	30389.2	38591.3	88508.4	97652.7	36896.6	56109.8	37091.9	83752.7	0	66670.8	686060	720746	757944	1.06719e+06	281918	303905	64160.1	348364	54430	44799.1	0	58309.1	0	0	88297.1	0
Glycerophosphoglycerol 2	0	0	0	0	0	0	0	0	0	0	0	0	0	0	0	0	0	0	0	0	0	131546	136113	121438	349839	0	0	0	0	0	0	0	0
Glycerophosphoglycerol 3	0	0	0	0	0	0	174950	83893.6	122591	187235	152617	142987	168836	119974	170990	72234	85963	0	0	0	0	2.53522e+06	2.7656e+06	2.06008e+06	4.02109e+06	0	0	0	0	109461	125294	83352.2	0
Glycerophosphoglycerol 4	0	0	0	0	0	0	87130.1	34218.9	71443.1	65939.5	57979.8	47840.9	57760.8	74065.9	76677.3	56671.7	62183	0	0	0	0	2.14842e+06	2.31529e+06	1.5553e+06	2.9244e+06	0	0	0	0	0	0	0	0
Glycerophosphoglycerol 5	0	0	0	0	0	0	0	0	0	0	0	0	0	0	0	0	0	0	0	0	0	204968	167778	114198	517492	0	0	0	0	0	0	0	0
Glycerophosphoglycerol 6	0	0	0	0	0	0	0	0	0	0	0	0	0	0	0	0	0	0	0	0	0	843511	1.04903e+06	657716	1.23537e+06	0	0	0	0	0	0	0	0
Metabolite: GLYCINE	Formula: C2H5NO2	Mass: 75.03203
-----------------------------------------------------------------------------
Group: 1
Glycine C2H5NO2	blank1r	blank2r	blank3r	blank4	blank5	blank6	pooled_1	pooled_10	pooled_11	pooled_2	pooled_3	pooled_4	pooled_5	pooled_6	pooled_7	pooled_8	pooled_9	JK05	JK06	JK13	JK14	JK07	JK08	JK15	JK16	JK01	JK02	JK09	JK10	JK03	JK04	JK11	JK12
Glycine 0	1.33995e+06	394245	264908	381483	411474	390986	1.5931e+06	1.9545e+06	2.11436e+06	1.45709e+06	1.49664e+06	1.59427e+06	1.55799e+06	1.62324e+06	1.22767e+06	1.84085e+06	1.8986e+06	3.77877e+06	2.35363e+06	2.82451e+06	2.92415e+06	3.26295e+06	2.85954e+06	2.44325e+06	2.84516e+06	2.4934e+06	3.70282e+06	3.44083e+06	3.60514e+06	2.80394e+06	2.61528e+06	3.19877e+06	2.61336e+06
Glycine 1	0	0	0	0	0	0	0	0	0	0	0	0	0	0	0	0	0	0	0	0	0	0	0	0	0	0	0	0	0	0	0	0	0
Glycine 2	0	0	0	0	0	0	0	0	0	0	0	0	0	0	0	0	0	0	0	0	0	0	0	0	0	0	0	0	0	0	0	0	0
Group: 2
Glycine C2H5NO2	blank1r	blank2r	blank3r	blank4	blank5	blank6	pooled_1	pooled_10	pooled_11	pooled_2	pooled_3	pooled_4	pooled_5	pooled_6	pooled_7	pooled_8	pooled_9	JK05	JK06	JK13	JK14	JK07	JK08	JK15	JK16	JK01	JK02	JK09	JK10	JK03	JK04	JK11	JK12
Glycine 0	3.4333e+06	1.07449e+06	766446	1.16317e+06	1.07384e+06	1.09821e+06	5.72087e+06	6.70301e+06	7.9115e+06	5.4362e+06	5.48821e+06	5.57194e+06	5.62639e+06	5.7541e+06	5.47781e+06	6.18891e+06	6.79466e+06	2.10453e+07	1.12954e+07	1.66035e+07	1.43948e+07	1.41238e+07	1.55275e+07	1.29343e+07	1.48487e+07	1.44853e+07	1.82631e+07	1.94234e+07	2.38942e+07	1.89945e+07	1.96751e+07	2.31364e+07	1.96173e+07
Glycine 1	0	0	0	0	0	0	0	0	30278.5	36027.7	0	36016.7	27212.5	0	0	0	17304	139450	0	74321	98598.8	84555.5	99674.7	82244.5	57013.9	83841	147531	134974	207593	137024	171806	179644	148020
Glycine 2	0	0	0	0	0	0	0	0	0	0	0	0	0	0	0	0	0	0	0	0	0	0	0	0	0	0	0	0	0	0	0	0	0
Metabolite: GLYCODEOXYCHOLATE	Formula: C26H43NO5	Mass: 449.3141
-----------------------------------------------------------------------------
Group: 1
Glycodeoxycholate C26H43NO5	blank1r	blank2r	blank3r	blank4	blank5	blank6	pooled_1	pooled_10	pooled_11	pooled_2	pooled_3	pooled_4	pooled_5	pooled_6	pooled_7	pooled_8	pooled_9	JK05	JK06	JK13	JK14	JK07	JK08	JK15	JK16	JK01	JK02	JK09	JK10	JK03	JK04	JK11	JK12
Glycodeoxycholate 0	0	0	0	0	0	0	398747	280112	291619	288579	335527	335386	339106	255336	363420	348754	232280	1.9646e+06	1.81169e+06	1.52951e+06	1.51899e+06	1.9063e+06	1.98075e+06	1.99975e+06	1.31946e+06	869503	457237	776332	1.10309e+06	794327	2.21351e+06	1.25482e+06	1.5102e+06
Glycodeoxycholate 1	0	0	0	0	0	0	0	0	41409.3	0	0	0	43121.6	0	0	0	0	173924	337307	207512	180933	233285	187092	238401	133904	0	0	64349	55254.7	111890	448509	167153	158910
Glycodeoxycholate 2	0	0	0	0	0	0	0	0	0	0	0	0	0	0	0	0	0	0	0	0	0	0	0	0	0	0	0	0	0	0	0	0	0
Glycodeoxycholate 3	0	0	0	0	0	0	0	0	0	0	0	0	0	0	0	0	0	0	0	0	0	0	0	0	0	0	0	0	0	0	0	0	0
Glycodeoxycholate 4	0	0	0	0	0	0	0	0	0	0	0	0	0	0	0	0	0	0	0	0	0	0	0	0	0	0	0	0	0	0	0	0	0
Glycodeoxycholate 5	0	0	0	0	0	0	0	0	0	0	0	0	0	0	0	0	0	0	0	0	0	0	0	0	0	0	0	0	0	0	0	0	0
Glycodeoxycholate 6	0	0	0	0	0	0	0	0	0	0	0	0	0	0	0	0	0	0	0	0	0	0	0	0	0	0	0	0	0	0	0	0	0
Glycodeoxycholate 7	0	0	0	0	0	0	0	0	0	0	0	0	0	0	0	0	0	0	0	0	0	0	0	0	0	0	0	0	0	0	0	0	0
Glycodeoxycholate 8	0	0	0	0	0	0	0	0	0	0	0	0	0	0	0	0	0	0	0	0	0	0	0	0	0	0	0	0	0	0	0	0	0
Glycodeoxycholate 9	0	0	0	0	0	0	0	0	0	0	0	0	0	0	0	0	0	0	0	0	0	0	0	0	0	0	0	0	0	0	0	0	0
Glycodeoxycholate 10	0	0	0	0	0	0	0	0	0	0	0	0	0	0	0	0	0	0	0	0	0	0	0	0	0	0	0	0	0	0	0	0	0
Glycodeoxycholate 11	0	0	0	0	0	0	0	0	0	0	0	0	0	0	0	0	0	0	0	0	0	0	0	0	0	0	0	0	0	0	0	0	0
Glycodeoxycholate 12	0	0	0	0	0	0	0	0	0	0	0	0	0	0	0	0	0	0	0	0	0	0	0	0	0	0	0	0	0	0	0	0	0
Glycodeoxycholate 13	0	0	0	0	0	0	0	0	0	0	0	0	0	0	0	0	0	0	0	0	0	0	0	0	0	0	0	0	0	0	0	0	0
Glycodeoxycholate 14	0	0	0	0	0	0	0	0	0	0	0	0	0	0	0	0	0	0	0	0	0	0	0	0	0	0	0	0	0	0	0	0	0
Glycodeoxycholate 15	0	0	0	0	0	0	0	0	0	0	0	0	0	0	0	0	0	0	0	0	0	0	0	0	0	0	0	0	0	0	0	0	0
Glycodeoxycholate 16	0	0	0	0	0	0	0	0	0	0	0	0	0	0	0	0	0	0	0	0	0	0	0	0	0	0	0	0	0	0	0	0	0
Glycodeoxycholate 17	0	0	0	0	0	0	0	0	0	0	0	0	0	0	0	0	0	0	0	0	0	0	0	0	0	0	0	0	0	0	0	0	0
Glycodeoxycholate 18	0	0	0	0	0	0	0	0	0	0	0	0	0	0	0	0	0	0	0	0	0	0	0	0	0	0	0	0	0	0	0	0	0
Glycodeoxycholate 19	0	0	0	0	0	0	0	0	0	0	0	0	0	0	0	0	0	0	0	0	0	0	0	0	0	0	0	0	0	0	0	0	0
Glycodeoxycholate 20	0	0	0	0	0	0	0	0	0	0	0	0	0	0	0	0	0	0	0	0	0	0	0	0	0	0	0	0	0	0	0	0	0
Glycodeoxycholate 21	0	0	0	0	0	0	0	0	0	0	0	0	0	0	0	0	0	0	0	0	0	0	0	0	0	0	0	0	0	0	0	0	0
Glycodeoxycholate 22	0	0	0	0	0	0	0	0	0	0	0	0	0	0	0	0	0	0	0	0	0	0	0	0	0	0	0	0	0	0	0	0	0
Glycodeoxycholate 23	0	0	0	0	0	0	0	0	0	0	0	0	0	0	0	0	0	0	0	0	0	0	0	0	0	0	0	0	0	0	0	0	0
Glycodeoxycholate 24	0	0	0	0	0	0	0	0	0	0	0	0	0	0	0	0	0	0	0	0	0	0	0	0	0	0	0	0	0	0	0	0	0
Glycodeoxycholate 25	0	0	0	0	0	0	0	0	0	0	0	0	0	0	0	0	0	0	0	0	0	0	0	0	0	0	0	0	0	0	0	0	0
Glycodeoxycholate 26	0	0	0	0	0	0	0	0	0	0	0	0	0	0	0	0	0	0	0	0	0	0	0	0	0	0	0	0	0	0	0	0	0
Metabolite: GLYCYLPROLINE	Formula: C7H12N2O3	Mass: 172.0848
-----------------------------------------------------------------------------
Group: 1
Glycylproline C7H12N2O3	blank1r	blank2r	blank3r	blank4	blank5	blank6	pooled_1	pooled_10	pooled_11	pooled_2	pooled_3	pooled_4	pooled_5	pooled_6	pooled_7	pooled_8	pooled_9	JK05	JK06	JK13	JK14	JK07	JK08	JK15	JK16	JK01	JK02	JK09	JK10	JK03	JK04	JK11	JK12
Glycylproline 0	0	0	0	0	0	0	204724	150172	136032	245343	182771	174087	203100	192688	168024	147049	182353	1.04246e+06	2.11977e+06	375611	336963	1.15915e+06	1.30538e+06	316567	427937	1.32564e+06	1.31505e+06	466694	504558	908209	920529	570112	557851
Glycylproline 1	0	0	0	0	0	0	0	0	0	0	0	0	0	0	0	0	0	0	37003.8	0	0	44894.8	0	0	0	24352.7	21781.8	0	0	0	0	0	0
Glycylproline 2	0	0	0	0	0	0	0	0	0	0	0	0	0	0	0	0	0	0	0	0	0	0	0	0	0	0	0	0	0	0	0	0	0
Glycylproline 3	0	0	0	0	0	0	0	0	0	0	0	0	0	0	0	0	0	0	0	0	0	0	0	0	0	0	0	0	0	0	0	0	0
Glycylproline 4	0	0	0	0	0	0	0	0	0	0	0	0	0	0	0	0	0	0	0	0	0	0	0	0	0	0	0	0	0	0	0	0	0
Glycylproline 5	0	0	0	0	0	0	0	0	0	0	0	0	0	0	0	0	0	0	0	0	0	0	0	0	0	0	0	0	0	0	0	0	0
Glycylproline 6	0	0	0	0	0	0	0	0	0	0	0	0	0	0	0	0	0	0	0	0	0	0	0	0	0	0	0	0	0	0	0	0	0
Glycylproline 7	0	0	0	0	0	0	0	0	0	0	0	0	0	0	0	0	0	0	0	0	0	0	0	0	0	0	0	0	0	0	0	0	0
Metabolite: GMP	Formula: C10H14N5O8P	Mass: 363.058
-----------------------------------------------------------------------------
Group: 1
GMP C10H14N5O8P	blank1r	blank2r	blank3r	blank4	blank5	blank6	pooled_1	pooled_10	pooled_11	pooled_2	pooled_3	pooled_4	pooled_5	pooled_6	pooled_7	pooled_8	pooled_9	JK05	JK06	JK13	JK14	JK07	JK08	JK15	JK16	JK01	JK02	JK09	JK10	JK03	JK04	JK11	JK12
GMP 0	0	0	0	0	0	0	221402	0	159019	162377	153165	171099	183176	153759	217894	137530	138926	2.44647e+06	347573	924266	468857	318322	581069	125375	351888	353092	230283	222232	394252	824403	1.16913e+06	1.07196e+06	1.04822e+06
GMP 1	0	0	0	0	0	0	0	0	0	0	0	0	0	0	0	0	0	135360	0	0	0	0	0	0	0	0	0	0	0	41618.1	0	0	0
GMP 2	0	0	0	0	0	0	0	0	0	0	0	0	0	0	0	0	0	0	0	0	0	0	0	0	0	0	0	0	0	0	0	0	0
GMP 3	0	0	0	0	0	0	0	0	0	0	0	0	0	0	0	0	0	0	0	0	0	0	0	0	0	0	0	0	0	0	0	0	0
GMP 4	0	0	0	0	0	0	0	0	0	0	0	0	0	0	0	0	0	0	0	0	0	0	0	0	0	0	0	0	0	0	0	0	0
GMP 5	0	0	0	0	0	0	0	0	0	0	0	0	0	0	0	0	0	0	0	0	0	0	67333.8	0	74164.4	0	0	0	0	0	0	0	0
GMP 6	0	0	0	0	0	0	0	0	0	0	0	0	0	0	0	0	0	0	0	0	0	0	0	0	0	0	0	0	0	0	0	0	0
GMP 7	0	0	0	0	0	0	0	0	0	0	0	0	0	0	0	0	0	0	0	0	0	0	0	0	0	0	0	0	0	0	0	0	0
GMP 8	0	0	0	0	0	0	0	0	0	0	0	0	0	0	0	0	0	0	0	0	0	0	0	0	0	0	0	0	0	0	0	0	0
GMP 9	0	0	0	0	0	0	0	0	0	0	0	0	0	0	0	0	0	0	0	0	0	0	0	0	0	0	0	0	0	0	0	0	0
GMP 10	0	0	0	0	0	0	0	0	0	0	0	0	0	0	0	0	0	0	0	0	0	0	0	0	0	0	0	0	0	0	0	0	0
Metabolite: GTP	Formula: C10H16N5O14P3	Mass: 522.9907
-----------------------------------------------------------------------------
Group: 1
GTP C10H16N5O14P3	blank1r	blank2r	blank3r	blank4	blank5	blank6	pooled_1	pooled_10	pooled_11	pooled_2	pooled_3	pooled_4	pooled_5	pooled_6	pooled_7	pooled_8	pooled_9	JK05	JK06	JK13	JK14	JK07	JK08	JK15	JK16	JK01	JK02	JK09	JK10	JK03	JK04	JK11	JK12
GTP 0	0	0	0	0	0	0	1.76448e+06	1.64986e+06	1.11122e+06	1.73414e+06	1.75247e+06	1.65581e+06	1.69188e+06	1.69364e+06	1.83369e+06	1.73932e+06	1.8263e+06	2.59848e+06	6.90502e+06	8.02104e+06	7.74797e+06	4.10444e+06	3.00647e+06	4.59906e+06	4.51903e+06	6.7964e+06	4.68096e+06	8.12254e+06	5.71089e+06	7.11781e+06	7.64684e+06	8.13777e+06	7.97443e+06
GTP 1	0	0	0	0	0	0	103385	116200	33492.2	129552	80693.7	123739	115051	105198	146455	110630	127715	216425	676280	843715	823075	405348	289627	484958	509097	713288	577564	817728	544662	786491	875530	872800	929700
GTP 2	0	0	0	0	0	0	0	0	0	0	20206.4	0	0	0	0	0	0	0	38038	0	35243.3	410754	189959	403065	438290	0	0	44231.5	0	283615	357322	386035	348261
GTP 3	0	0	0	0	0	0	0	0	0	0	0	0	0	0	0	0	0	0	0	0	0	309642	235589	426432	417920	0	0	0	0	198646	198785	189697	273852
GTP 4	0	0	0	0	0	0	0	0	0	0	0	0	0	0	0	0	0	0	0	0	0	20135.2	0	31744	0	0	0	0	0	0	0	0	0
GTP 5	0	0	0	0	0	0	35061.3	34909.8	0	0	45574.9	0	28705.8	0	39313.5	0	36955.7	0	0	0	0	1.18716e+06	719389	2.16851e+06	1.88309e+06	0	0	0	0	27180.5	33707	29936.8	0
GTP 6	0	0	0	0	0	0	0	0	0	0	0	0	0	0	0	0	0	0	0	0	0	0	0	74542.3	48521	0	0	0	0	0	0	0	0
GTP 7	0	0	0	0	0	0	0	0	0	0	0	0	0	0	0	0	0	0	0	0	0	0	0	0	0	0	0	0	0	0	0	0	0
GTP 8	0	0	0	0	0	0	0	0	0	0	0	0	0	0	0	0	0	0	0	0	0	0	0	0	0	0	0	0	0	0	0	0	0
GTP 9	0	0	0	0	0	0	0	0	0	0	0	0	0	0	0	0	0	0	0	0	0	0	0	0	0	0	0	0	0	0	0	0	0
GTP 10	0	0	0	0	0	0	0	0	0	0	0	0	0	0	0	0	0	0	0	0	0	0	0	0	0	0	0	0	0	0	0	0	0
Metabolite: HEPES	Formula: C8H18N2O4S	Mass: 238.0987
-----------------------------------------------------------------------------
Group: 1
HEPES C8H18N2O4S	blank1r	blank2r	blank3r	blank4	blank5	blank6	pooled_1	pooled_10	pooled_11	pooled_2	pooled_3	pooled_4	pooled_5	pooled_6	pooled_7	pooled_8	pooled_9	JK05	JK06	JK13	JK14	JK07	JK08	JK15	JK16	JK01	JK02	JK09	JK10	JK03	JK04	JK11	JK12
HEPES 0	0	0	0	0	0	0	4.54334e+08	4.56214e+08	4.58437e+08	4.55335e+08	4.62475e+08	4.51436e+08	4.60079e+08	4.59441e+08	4.61518e+08	4.62739e+08	4.50137e+08	1069291465	2.1158e+09	2173398277	8.60317e+08	1311464250	1.30947e+09	1967573510	1.34093e+09	1.02886e+09	6.2714e+08	5.46953e+08	7.52964e+08	7.62092e+08	9.86473e+08	8.44433e+08	7.09197e+08
HEPES 1	0	0	0	0	0	0	3.75329e+07	3.78637e+07	3.80745e+07	3.78674e+07	3.88244e+07	3.76608e+07	3.82524e+07	3.7546e+07	3.75532e+07	3.85094e+07	3.74926e+07	8.93041e+07	1.7619e+08	179885522	7.13826e+07	1.08819e+08	1.09715e+08	1.63207e+08	1.11455e+08	8.50405e+07	5.15657e+07	4.51784e+07	6.26183e+07	6.35666e+07	8.27683e+07	6.95476e+07	5.85076e+07
HEPES 2	0	0	0	0	0	0	0	0	0	0	0	0	0	0	0	0	0	0	0	0	0	0	0	0	0	0	0	0	0	0	0	0	0
HEPES 3	0	0	0	0	0	0	0	0	0	0	0	0	0	0	0	0	0	0	0	0	0	0	0	0	0	0	0	0	0	0	0	0	0
HEPES 4	0	0	0	0	0	0	0	0	0	0	0	0	0	0	0	0	0	0	0	0	0	0	0	0	0	0	0	0	0	0	0	0	0
HEPES 5	0	0	0	0	0	0	0	0	0	0	0	0	0	0	0	0	0	0	0	0	0	0	0	0	0	0	0	0	0	0	0	0	0
HEPES 6	0	0	0	0	0	0	0	0	0	0	0	0	0	0	0	0	0	0	0	0	0	0	0	0	0	0	0	0	0	0	0	0	0
HEPES 7	0	0	0	0	0	0	0	0	0	0	0	0	0	0	0	0	0	0	0	0	0	0	0	0	0	0	0	0	0	0	0	0	0
HEPES 8	0	0	0	0	0	0	0	0	0	0	0	0	0	0	0	0	0	0	0	0	0	0	0	0	0	0	0	0	0	0	0	0	0
Group: 2
HEPES C8H18N2O4S	blank1r	blank2r	blank3r	blank4	blank5	blank6	pooled_1	pooled_10	pooled_11	pooled_2	pooled_3	pooled_4	pooled_5	pooled_6	pooled_7	pooled_8	pooled_9	JK05	JK06	JK13	JK14	JK07	JK08	JK15	JK16	JK01	JK02	JK09	JK10	JK03	JK04	JK11	JK12
HEPES 0	0	0	0	0	0	0	214028	207212	170943	231229	262685	142982	248345	198624	270026	186088	259772	950764	2.05051e+06	1.98712e+06	615349	1.18951e+06	1.2428e+06	1.95642e+06	967365	765619	344323	256076	551768	571668	927482	734784	515772
HEPES 1	0	0	0	0	0	0	0	0	0	0	0	0	0	0	0	0	0	0	57803.7	33233.8	0	32836.5	45997.5	70462.2	43801.3	0	0	0	0	0	0	0	0
HEPES 2	0	0	0	0	0	0	0	0	0	0	0	0	0	0	0	0	0	0	0	0	0	0	0	0	0	0	0	0	0	0	0	0	0
HEPES 3	0	0	0	0	0	0	0	0	0	0	0	0	0	0	0	0	0	0	0	0	0	0	0	0	0	0	0	0	0	0	0	0	0
HEPES 4	0	0	0	0	0	0	0	0	0	0	0	0	0	0	0	0	0	0	0	0	0	0	0	0	0	0	0	0	0	0	0	0	0
HEPES 5	0	0	0	0	0	0	0	0	0	0	0	0	0	0	0	0	0	0	0	0	0	0	0	0	0	0	0	0	0	0	0	0	0
HEPES 6	0	0	0	0	0	0	0	0	0	0	0	0	0	0	0	0	0	0	0	0	0	0	0	0	0	0	0	0	0	0	0	0	0
HEPES 7	0	0	0	0	0	0	0	0	0	0	0	0	0	0	0	0	0	0	0	0	0	0	0	0	0	0	0	0	0	0	0	0	0
HEPES 8	0	0	0	0	0	0	0	0	0	0	0	0	0	0	0	0	0	0	0	0	0	0	0	0	0	0	0	0	0	0	0	0	0
Metabolite: HOMOCYSTEINESULFINICACID	Formula: C4H9NO4S	Mass: 167.0252
-----------------------------------------------------------------------------
Group: 1
Homocysteinesulfinicacid C4H9NO4S	blank1r	blank2r	blank3r	blank4	blank5	blank6	pooled_1	pooled_10	pooled_11	pooled_2	pooled_3	pooled_4	pooled_5	pooled_6	pooled_7	pooled_8	pooled_9	JK05	JK06	JK13	JK14	JK07	JK08	JK15	JK16	JK01	JK02	JK09	JK10	JK03	JK04	JK11	JK12
Homocysteinesulfinicacid 0	0	0	0	0	0	0	172226	136177	166987	127231	95796.4	166703	120923	175319	111128	129758	147794	509799	1.02238e+06	1.22045e+06	378177	591092	560910	1.07846e+06	583535	483105	247208	226584	414178	282400	351698	445845	299824
Homocysteinesulfinicacid 1	0	0	0	0	0	0	0	0	0	0	0	0	0	0	0	0	0	0	0	0	0	0	0	0	0	0	0	0	0	0	0	0	0
Homocysteinesulfinicacid 2	0	0	0	0	0	0	0	0	0	0	0	0	0	0	0	0	0	0	0	0	0	0	0	0	0	0	0	0	0	0	0	0	0
Homocysteinesulfinicacid 3	0	0	0	0	0	0	0	0	0	0	0	0	0	0	0	0	0	0	0	0	0	0	0	0	0	0	0	0	0	0	0	0	0
Homocysteinesulfinicacid 4	0	0	0	0	0	0	0	0	0	0	0	0	0	0	0	0	0	0	0	0	0	0	0	0	0	0	0	0	0	0	0	0	0
Metabolite: HYDROXYMETHYLPHOSPHONATE	Formula: CH5O4P	Mass: 111.9925
-----------------------------------------------------------------------------
Group: 1
Hydroxymethylphosphonate CH5O4P	blank1r	blank2r	blank3r	blank4	blank5	blank6	pooled_1	pooled_10	pooled_11	pooled_2	pooled_3	pooled_4	pooled_5	pooled_6	pooled_7	pooled_8	pooled_9	JK05	JK06	JK13	JK14	JK07	JK08	JK15	JK16	JK01	JK02	JK09	JK10	JK03	JK04	JK11	JK12
Hydroxymethylphosphonate 0	0	0	0	0	0	0	1.54838e+06	1.497e+06	1.411e+06	1.59634e+06	1.53972e+06	1.60329e+06	1.56376e+06	1.51437e+06	1.39739e+06	1.50027e+06	1.54705e+06	1.69825e+06	2.22263e+06	1.84581e+06	2.24403e+06	3.38427e+06	2.21712e+06	1.92432e+06	2.76625e+06	2.89249e+06	3.14807e+06	5.50342e+06	3.62251e+06	4.16932e+06	4.10207e+06	4.176e+06	5.96723e+06
Hydroxymethylphosphonate 1	0	0	0	0	0	0	0	0	0	0	0	0	0	0	0	0	0	0	0	0	0	0	0	0	0	0	0	0	0	0	0	0	0
Metabolite: HYDROXYPYRUVALDEHYDE PHOSPHATE	Formula: C3H5O6P	Mass: 167.9824
-----------------------------------------------------------------------------
Group: 1
hydroxypyruvaldehyde phosphate C3H5O6P	blank1r	blank2r	blank3r	blank4	blank5	blank6	pooled_1	pooled_10	pooled_11	pooled_2	pooled_3	pooled_4	pooled_5	pooled_6	pooled_7	pooled_8	pooled_9	JK05	JK06	JK13	JK14	JK07	JK08	JK15	JK16	JK01	JK02	JK09	JK10	JK03	JK04	JK11	JK12
hydroxypyruvaldehyde phosphate 0	0	0	0	0	0	0	47903.3	99552.2	80109.3	41262.2	26962.7	37213.1	91194.6	66993.4	58068.4	40039.7	60919.7	84065.6	333392	563594	600614	46592.6	126029	41152.2	24392.2	323055	459339	594121	409253	358332	119615	330253	140862
hydroxypyruvaldehyde phosphate 1	0	0	0	0	0	0	0	0	0	0	0	0	0	0	0	0	0	0	0	0	0	0	0	0	0	0	0	0	0	0	0	0	0
hydroxypyruvaldehyde phosphate 2	0	0	0	0	0	0	0	0	0	0	0	0	0	0	0	0	0	0	0	0	0	0	0	0	0	0	0	0	0	0	0	0	0
hydroxypyruvaldehyde phosphate 3	0	0	0	0	0	0	0	0	0	0	0	0	0	0	0	0	0	0	0	0	0	255443	327346	429507	222744	0	0	0	0	0	0	0	0
Group: 2
hydroxypyruvaldehyde phosphate C3H5O6P	blank1r	blank2r	blank3r	blank4	blank5	blank6	pooled_1	pooled_10	pooled_11	pooled_2	pooled_3	pooled_4	pooled_5	pooled_6	pooled_7	pooled_8	pooled_9	JK05	JK06	JK13	JK14	JK07	JK08	JK15	JK16	JK01	JK02	JK09	JK10	JK03	JK04	JK11	JK12
hydroxypyruvaldehyde phosphate 0	0	0	0	0	0	0	433334	0	0	367126	288371	308782	301779	315054	464732	0	0	0	818462	1.04982e+06	638294	0	177139	0	0	1.56191e+06	625561	3.69261e+06	2.1831e+06	444422	904392	595552	1.43959e+06
hydroxypyruvaldehyde phosphate 1	0	0	0	0	0	0	0	0	0	0	0	0	0	0	0	0	0	0	0	0	0	0	0	0	0	0	0	0	0	0	0	0	0
hydroxypyruvaldehyde phosphate 2	0	0	0	0	0	0	0	0	0	0	0	0	0	0	0	0	0	0	0	0	0	0	0	0	0	0	0	0	0	0	0	0	0
hydroxypyruvaldehyde phosphate 3	0	0	0	0	0	0	0	0	0	0	0	0	0	0	0	0	0	0	0	0	0	270085	421762	622433	294922	0	0	0	0	0	0	0	52478.2
Metabolite: HYDROXYPYRUVATE	Formula: C3H4O4	Mass: 104.011
-----------------------------------------------------------------------------
Group: 1
Hydroxypyruvate C3H4O4	blank1r	blank2r	blank3r	blank4	blank5	blank6	pooled_1	pooled_10	pooled_11	pooled_2	pooled_3	pooled_4	pooled_5	pooled_6	pooled_7	pooled_8	pooled_9	JK05	JK06	JK13	JK14	JK07	JK08	JK15	JK16	JK01	JK02	JK09	JK10	JK03	JK04	JK11	JK12
Hydroxypyruvate 0	7.39007e+06	1.34081e+06	1.43508e+06	1.21804e+06	1.3482e+06	1.29544e+06	2.8323e+06	1.82071e+06	2.28708e+06	2.46464e+06	2.52546e+06	2.47113e+06	2.65998e+06	2.68749e+06	2.76752e+06	1.87691e+06	2.15161e+06	2.64538e+06	3.58546e+06	1.90389e+06	2.19423e+06	2.97079e+06	3.227e+06	3.10976e+06	2.32221e+06	3.84027e+06	2.69131e+06	3.21581e+06	2.61203e+06	3.28586e+06	3.22922e+06	2.31754e+06	2.30429e+06
Hydroxypyruvate 1	86141	0	0	0	0	0	55331.1	0	0	35374.9	23687.3	27079.9	28823.4	0	0	0	0	69021.1	102530	0	0	67042.3	54094.7	34258.7	47257.3	80577.5	52034.5	90518.1	44452.9	110564	0	0	0
Hydroxypyruvate 2	0	0	0	0	0	0	0	0	0	0	0	0	0	0	0	0	0	0	0	0	0	0	0	0	0	0	0	0	0	0	0	0	0
Hydroxypyruvate 3	0	0	0	0	0	0	0	0	0	0	0	0	0	0	0	0	0	0	0	0	0	0	0	0	0	0	0	0	0	0	0	0	0
Metabolite: IMIDAZOLE-4-ACETATE	Formula: C5H6N2O2	Mass: 126.0429
-----------------------------------------------------------------------------
Group: 1
Imidazole-4-acetate C5H6N2O2	blank1r	blank2r	blank3r	blank4	blank5	blank6	pooled_1	pooled_10	pooled_11	pooled_2	pooled_3	pooled_4	pooled_5	pooled_6	pooled_7	pooled_8	pooled_9	JK05	JK06	JK13	JK14	JK07	JK08	JK15	JK16	JK01	JK02	JK09	JK10	JK03	JK04	JK11	JK12
Imidazole-4-acetate 0	3.58156e+06	3.20979e+06	3.20767e+06	4.44819e+06	4.27618e+06	4.19299e+06	4.3318e+06	3.62709e+06	3.88578e+06	4.32096e+06	3.8322e+06	4.22672e+06	3.89566e+06	3.50359e+06	9.76699e+06	4.33701e+06	4.22962e+06	9.69635e+06	1.69652e+07	2.14021e+07	9.17612e+06	1.11787e+07	1.34763e+07	1.78364e+07	1.46803e+07	1.1369e+07	8.50305e+06	1.24149e+07	1.06508e+07	9.24426e+06	1.23281e+07	1.09263e+07	9.79987e+06
Imidazole-4-acetate 1	0	0	0	26408.1	24588.5	28181.7	0	0	0	0	0	0	0	0	0	0	0	0	95654.9	134869	0	0	0	117746	72978.9	0	0	0	0	0	0	0	0
Imidazole-4-acetate 2	0	0	0	0	0	0	0	0	0	0	0	0	0	0	0	0	0	0	0	0	0	0	0	0	0	0	0	0	0	0	0	0	0
Imidazole-4-acetate 3	0	0	0	0	0	0	0	0	0	0	0	0	0	0	0	0	0	0	0	0	0	0	0	0	0	0	0	0	0	0	0	0	0
Imidazole-4-acetate 4	0	0	0	0	0	0	0	0	0	0	0	0	0	0	0	0	0	0	0	0	0	0	0	0	0	0	0	0	0	0	0	0	0
Imidazole-4-acetate 5	0	0	0	0	0	0	0	0	0	0	0	0	0	0	0	0	0	0	0	0	0	0	0	0	0	0	0	0	0	0	0	0	0
Metabolite: INDOLEPYRUVATE	Formula: C11H9NO3	Mass: 203.0582
-----------------------------------------------------------------------------
Group: 1
Indolepyruvate C11H9NO3	blank1r	blank2r	blank3r	blank4	blank5	blank6	pooled_1	pooled_10	pooled_11	pooled_2	pooled_3	pooled_4	pooled_5	pooled_6	pooled_7	pooled_8	pooled_9	JK05	JK06	JK13	JK14	JK07	JK08	JK15	JK16	JK01	JK02	JK09	JK10	JK03	JK04	JK11	JK12
Indolepyruvate 0	0	0	0	0	0	0	4.16075e+06	5.36506e+06	4.34336e+06	4.39281e+06	4.1213e+06	3.69615e+06	3.72681e+06	4.6645e+06	4.27136e+06	4.42405e+06	4.27964e+06	2.23659e+07	2.03708e+07	1.85737e+07	1.07607e+07	1.45662e+07	1.79476e+07	1.66973e+07	9.55122e+06	1.16454e+07	8.13407e+06	1.11819e+07	1.54188e+07	1.64139e+07	1.434e+07	1.75249e+07	1.19511e+07
Indolepyruvate 1	0	0	0	0	0	0	398862	610971	396703	283946	506244	321580	271301	421724	429309	204047	250788	2.65102e+06	2.12169e+06	2.53215e+06	1.1053e+06	1.59175e+06	2.25797e+06	1.82092e+06	1.04397e+06	1.16236e+06	954018	797723	1.97628e+06	1.77773e+06	1.5839e+06	2.04808e+06	1.23583e+06
Indolepyruvate 2	0	0	0	0	0	0	0	0	0	0	0	0	0	0	0	0	0	0	0	0	0	0	0	0	0	0	0	0	0	0	0	0	0
Indolepyruvate 3	0	0	0	0	0	0	0	0	0	0	0	0	0	0	0	0	0	0	0	0	0	0	0	0	0	0	0	0	0	0	0	0	0
Indolepyruvate 4	0	0	0	0	0	0	0	0	0	0	0	0	0	0	0	0	0	0	0	0	0	0	0	0	0	0	0	0	0	0	0	0	0
Indolepyruvate 5	0	0	0	0	0	0	0	0	0	0	0	0	0	0	0	0	0	0	0	0	0	0	0	0	0	0	0	0	0	0	0	0	0
Indolepyruvate 6	0	0	0	0	0	0	0	0	0	0	0	0	0	0	0	0	0	0	0	0	0	0	0	0	0	0	0	0	0	0	0	0	0
Indolepyruvate 7	0	0	0	0	0	0	0	0	0	0	0	0	0	0	0	0	0	0	0	0	0	0	0	0	0	0	0	0	0	0	0	0	0
Indolepyruvate 8	0	0	0	0	0	0	0	0	0	0	0	0	0	0	0	0	0	0	0	0	0	0	0	0	0	0	0	0	0	0	0	0	0
Indolepyruvate 9	0	0	0	0	0	0	0	0	0	0	0	0	0	0	0	0	0	0	0	0	0	0	0	0	0	0	0	0	0	0	0	0	0
Indolepyruvate 10	0	0	0	0	0	0	0	0	0	0	0	0	0	0	0	0	0	0	0	0	0	0	0	0	0	0	0	0	0	0	0	0	0
Indolepyruvate 11	0	0	0	0	0	0	0	0	0	0	0	0	0	0	0	0	0	0	0	0	0	0	0	0	0	0	0	0	0	0	0	0	0
Metabolite: INOSINE	Formula: C10H12N4O5	Mass: 268.0808
-----------------------------------------------------------------------------
Group: 1
Inosine C10H12N4O5	blank1r	blank2r	blank3r	blank4	blank5	blank6	pooled_1	pooled_10	pooled_11	pooled_2	pooled_3	pooled_4	pooled_5	pooled_6	pooled_7	pooled_8	pooled_9	JK05	JK06	JK13	JK14	JK07	JK08	JK15	JK16	JK01	JK02	JK09	JK10	JK03	JK04	JK11	JK12
Inosine 0	0	0	0	0	0	0	0	25231.3	0	0	0	0	0	0	0	0	0	137995	64971.6	84817.8	76199.5	31762.1	38324.4	0	40196.1	73095.8	91913.2	276263	189727	110386	80372.8	95922.8	78674.2
Inosine 1	0	0	0	0	0	0	0	0	0	0	0	0	0	0	0	0	0	0	0	0	0	0	0	0	0	0	0	0	0	0	0	0	0
Inosine 2	0	0	0	0	0	0	0	0	0	0	0	0	0	0	0	0	0	0	0	0	0	0	0	0	0	0	0	0	0	0	0	0	0
Inosine 3	0	0	0	0	0	0	0	0	0	0	0	0	0	0	0	0	0	0	0	0	0	0	0	0	0	0	0	0	0	0	0	0	0
Inosine 4	0	0	0	0	0	0	0	0	0	0	0	0	0	0	0	0	0	0	0	0	0	0	0	0	0	0	0	0	0	0	0	0	0
Inosine 5	0	0	0	0	0	0	0	0	0	0	0	0	0	0	0	0	0	0	0	0	0	0	0	0	0	0	0	0	0	0	0	0	0
Inosine 6	0	0	0	0	0	0	0	0	0	0	0	0	0	0	0	0	0	0	0	0	0	0	0	0	0	0	0	0	0	0	0	0	0
Inosine 7	0	0	0	0	0	0	0	0	0	0	0	0	0	0	0	0	0	0	0	0	0	0	0	0	0	0	0	0	0	0	0	0	0
Inosine 8	0	0	0	0	0	0	0	0	0	0	0	0	0	0	0	0	0	0	0	0	0	0	0	0	0	0	0	0	0	0	0	0	0
Inosine 9	0	0	0	0	0	0	0	0	0	0	0	0	0	0	0	0	0	0	0	0	0	0	0	0	0	0	0	0	0	0	0	0	0
Inosine 10	0	0	0	0	0	0	0	0	0	0	0	0	0	0	0	0	0	0	0	0	0	0	0	0	0	0	0	0	0	0	0	0	0
Metabolite: ISOCITRATE	Formula: C6H8O7	Mass: 192.027
-----------------------------------------------------------------------------
Group: 1
Isocitrate C6H8O7	blank1r	blank2r	blank3r	blank4	blank5	blank6	pooled_1	pooled_10	pooled_11	pooled_2	pooled_3	pooled_4	pooled_5	pooled_6	pooled_7	pooled_8	pooled_9	JK05	JK06	JK13	JK14	JK07	JK08	JK15	JK16	JK01	JK02	JK09	JK10	JK03	JK04	JK11	JK12
Isocitrate 0	2.60476e+06	483151	542735	147965	203299	194519	2.15257e+06	652813	1.05704e+06	1.54982e+06	1.39247e+06	1.45566e+06	1.38149e+06	1.49043e+06	1.54006e+06	775690	941708	1.81997e+06	3.65219e+06	3.81796e+06	1.52326e+06	1.64516e+06	2.18911e+06	3.04056e+06	1.81852e+06	1.63233e+06	909756	673567	1.34388e+06	1.19047e+06	1.61399e+06	1.19355e+06	1.51503e+06
Isocitrate 1	0	0	0	0	0	0	23054.5	0	0	0	0	0	0	0	25064.8	0	0	0	101502	115302	0	0	71611.2	112828	51775.6	0	0	0	0	0	0	0	0
Isocitrate 2	0	0	0	0	0	0	0	0	0	0	0	0	0	0	0	0	0	0	0	0	0	0	0	0	0	0	0	0	0	0	0	0	0
Isocitrate 3	0	0	0	0	0	0	0	0	0	0	0	0	0	0	0	0	0	0	0	0	0	0	75993.4	36837.5	0	0	0	0	0	0	0	0	0
Isocitrate 4	0	0	0	0	0	0	0	0	0	0	0	0	0	0	0	0	0	0	0	0	0	0	0	0	0	0	0	0	0	0	0	0	0
Isocitrate 5	0	0	0	0	0	0	0	0	0	0	0	0	0	0	0	0	0	0	0	0	0	0	28583.9	0	0	0	0	0	0	0	0	0	0
Isocitrate 6	0	0	0	0	0	0	0	0	0	0	0	0	0	0	0	0	0	0	0	0	0	0	0	0	0	0	0	0	0	0	0	0	0
Metabolite: L-1-PYRROLINE-3-HYDROXY-5-CARBOXYLATE	Formula: C5H7NO3	Mass: 129.0426
-----------------------------------------------------------------------------
Group: 1
L-1-Pyrroline-3-hydroxy-5-carboxylate C5H7NO3	blank1r	blank2r	blank3r	blank4	blank5	blank6	pooled_1	pooled_10	pooled_11	pooled_2	pooled_3	pooled_4	pooled_5	pooled_6	pooled_7	pooled_8	pooled_9	JK05	JK06	JK13	JK14	JK07	JK08	JK15	JK16	JK01	JK02	JK09	JK10	JK03	JK04	JK11	JK12
L-1-Pyrroline-3-hydroxy-5-carboxylate 0	2.56014e+06	2.57582e+06	3.30189e+06	3.79307e+06	3.6186e+06	3.85151e+06	5.58908e+06	3.94918e+06	4.07375e+06	5.30086e+06	4.76077e+06	4.62095e+06	4.86796e+06	4.75837e+06	4.3322e+06	4.10314e+06	4.31574e+06	9.35532e+06	7.98834e+06	1.09087e+07	8401346	6.5542e+06	7.94245e+06	8.71234e+06	7.41981e+06	7.72579e+06	6.67247e+06	7.50343e+06	8.18e+06	9.45203e+06	1.07352e+07	1.00254e+07	9.82505e+06
L-1-Pyrroline-3-hydroxy-5-carboxylate 1	23507.6	35068.5	52671.9	102941	69441	79138.4	169682	28990.7	64922.8	70841.4	119958	48144.5	95742.4	136868	64598.6	56605.2	63891.3	169190	0	285406	165036	77097.3	184846	166963	110833	104521	152918	166961	75815.3	253437	185224	203515	240178
L-1-Pyrroline-3-hydroxy-5-carboxylate 2	0	0	0	0	0	0	0	0	0	0	0	0	0	0	0	0	0	0	0	0	0	0	0	0	0	0	0	0	0	0	0	0	0
L-1-Pyrroline-3-hydroxy-5-carboxylate 3	0	0	0	0	0	0	0	0	0	0	0	0	0	0	0	0	0	0	0	0	0	0	0	0	0	0	0	0	0	0	0	0	0
L-1-Pyrroline-3-hydroxy-5-carboxylate 4	0	0	0	0	0	0	0	0	0	0	0	0	0	0	0	0	0	0	0	0	0	0	0	0	0	0	0	0	0	0	0	0	0
L-1-Pyrroline-3-hydroxy-5-carboxylate 5	0	0	0	0	0	0	0	0	0	0	0	0	0	0	0	0	0	0	0	0	0	0	0	0	0	0	0	0	0	0	0	0	0
Group: 2
L-1-Pyrroline-3-hydroxy-5-carboxylate C5H7NO3	blank1r	blank2r	blank3r	blank4	blank5	blank6	pooled_1	pooled_10	pooled_11	pooled_2	pooled_3	pooled_4	pooled_5	pooled_6	pooled_7	pooled_8	pooled_9	JK05	JK06	JK13	JK14	JK07	JK08	JK15	JK16	JK01	JK02	JK09	JK10	JK03	JK04	JK11	JK12
L-1-Pyrroline-3-hydroxy-5-carboxylate 0	9.11721e+06	8.23598e+06	1.21433e+07	1.25927e+07	1.25235e+07	1.21781e+07	2.96267e+08	3.02558e+08	2.96521e+08	2.96869e+08	2.97506e+08	2.94747e+08	3.00768e+08	2.97888e+08	2.97333e+08	3.01632e+08	2.96267e+08	7.44001e+08	8.96145e+08	1.05947e+09	6.28833e+08	7.44394e+08	8.13322e+08	9.24556e+08	7.81971e+08	6.03524e+08	5.55765e+08	6.60283e+08	7.89289e+08	8.18185e+08	8.78995e+08	9.4098e+08	8.349e+08
L-1-Pyrroline-3-hydroxy-5-carboxylate 1	147036	156849	441481	605654	502503	600201	1.61583e+07	1.64952e+07	1.63344e+07	1.61903e+07	1.58894e+07	1.6e+07	1.62985e+07	1.62574e+07	1.64954e+07	1.65095e+07	1.61905e+07	4.07993e+07	4.95752e+07	5.88835e+07	3.42982e+07	4.06532e+07	4.49067e+07	5.09595e+07	4.24457e+07	3.3284e+07	3.03752e+07	3.69739e+07	4.35477e+07	4.52783e+07	4.78251e+07	5.10828e+07	4.51313e+07
L-1-Pyrroline-3-hydroxy-5-carboxylate 2	0	0	0	0	0	0	241202	230945	262376	211088	218502	259022	273669	206565	246691	280349	218610	787341	780859	892545	661321	717459	872948	962404	728976	526415	503005	585822	805665	802808	913918	847008	866079
L-1-Pyrroline-3-hydroxy-5-carboxylate 3	0	0	0	0	0	0	0	0	0	0	0	0	0	0	0	0	0	0	0	0	0	0	0	0	0	0	0	0	0	0	0	0	0
L-1-Pyrroline-3-hydroxy-5-carboxylate 4	0	0	0	0	0	0	0	0	0	0	0	0	0	0	0	0	0	0	0	0	0	0	0	0	0	0	0	0	0	0	0	0	0
L-1-Pyrroline-3-hydroxy-5-carboxylate 5	0	0	0	0	0	0	0	0	0	0	0	0	0	0	0	0	0	0	0	0	0	0	0	0	0	0	0	0	0	0	0	0	0
Group: 3
L-1-Pyrroline-3-hydroxy-5-carboxylate C5H7NO3	blank1r	blank2r	blank3r	blank4	blank5	blank6	pooled_1	pooled_10	pooled_11	pooled_2	pooled_3	pooled_4	pooled_5	pooled_6	pooled_7	pooled_8	pooled_9	JK05	JK06	JK13	JK14	JK07	JK08	JK15	JK16	JK01	JK02	JK09	JK10	JK03	JK04	JK11	JK12
L-1-Pyrroline-3-hydroxy-5-carboxylate 0	7.10884e+06	6.27256e+06	8.67623e+06	9.93633e+06	9.7201e+06	9.84413e+06	1.59505e+07	1.1945e+07	1.3115e+07	1.48904e+07	1.45511e+07	1.43495e+07	1.4349e+07	1.423e+07	1.34294e+07	1.26598e+07	1.30872e+07	2.41966e+07	2.12204e+07	2.68583e+07	2.32724e+07	1.89455e+07	2.29971e+07	2.45469e+07	2.26766e+07	1.69985e+07	1.61131e+07	1.75988e+07	1.8557e+07	2.14504e+07	2.24376e+07	2.37146e+07	2.30398e+07
L-1-Pyrroline-3-hydroxy-5-carboxylate 1	33759.8	70856.5	179714	288473	227581	240351	419739	255425	277301	424930	435089	307499	413925	442396	274448	305511	339046	546223	475714	772548	537244	525579	636158	747233	602752	278615	433266	359343	336516	463270	444961	483959	401884
L-1-Pyrroline-3-hydroxy-5-carboxylate 2	0	0	0	0	0	0	0	0	0	0	0	0	0	0	0	0	0	0	0	0	0	0	0	0	0	0	0	0	0	0	0	0	0
L-1-Pyrroline-3-hydroxy-5-carboxylate 3	0	0	0	0	0	0	0	0	0	0	0	0	0	0	0	0	0	0	0	0	0	0	0	0	0	0	0	0	0	0	0	0	0
L-1-Pyrroline-3-hydroxy-5-carboxylate 4	0	0	0	0	0	0	0	0	0	0	0	0	0	0	0	0	0	0	0	0	0	0	0	0	0	0	0	0	0	0	0	0	0
L-1-Pyrroline-3-hydroxy-5-carboxylate 5	0	0	0	0	0	0	0	0	0	0	0	0	0	0	0	0	0	0	0	0	0	0	0	0	0	0	0	0	0	0	0	0	0
Group: 4
L-1-Pyrroline-3-hydroxy-5-carboxylate C5H7NO3	blank1r	blank2r	blank3r	blank4	blank5	blank6	pooled_1	pooled_10	pooled_11	pooled_2	pooled_3	pooled_4	pooled_5	pooled_6	pooled_7	pooled_8	pooled_9	JK05	JK06	JK13	JK14	JK07	JK08	JK15	JK16	JK01	JK02	JK09	JK10	JK03	JK04	JK11	JK12
L-1-Pyrroline-3-hydroxy-5-carboxylate 0	4.42031e+06	3.47772e+06	4.72069e+06	5.24081e+06	5.17978e+06	4.93955e+06	4.15321e+06	4.23602e+06	3.64125e+06	4.1164e+06	3.92517e+06	4.12904e+06	4.0483e+06	4.02111e+06	4.28798e+06	4.04437e+06	4.02221e+06	3.98567e+06	4.10022e+06	4.2453e+06	4.4795e+06	4.39017e+06	4.22825e+06	4.4258e+06	4.51456e+06	3.92733e+06	3.9642e+06	4.20211e+06	4.22431e+06	4.25511e+06	4.42743e+06	4.41352e+06	4.31528e+06
L-1-Pyrroline-3-hydroxy-5-carboxylate 1	32429.1	28003.4	81742.6	57387.2	114356	72635.3	32732	40440.9	29254.5	49627.5	23044.1	0	0	28677.1	33411	0	36715.5	0	38675.7	27673	26773.3	45809.2	0	28434.6	0	33927.6	0	53671.6	23994.7	0	42127.5	33135.8	29467.7
L-1-Pyrroline-3-hydroxy-5-carboxylate 2	0	0	0	0	0	0	0	0	0	0	0	0	0	0	0	0	0	0	0	0	0	0	0	0	0	0	0	0	0	0	0	0	0
L-1-Pyrroline-3-hydroxy-5-carboxylate 3	0	0	0	0	0	0	0	0	0	0	0	0	0	0	0	0	0	0	0	0	0	0	0	0	0	0	0	0	0	0	0	0	0
L-1-Pyrroline-3-hydroxy-5-carboxylate 4	0	0	0	0	0	0	0	0	0	0	0	0	0	0	0	0	0	0	0	0	0	0	0	0	0	0	0	0	0	0	0	0	0
L-1-Pyrroline-3-hydroxy-5-carboxylate 5	0	0	0	0	0	0	0	125438	74099	0	0	0	0	0	0	103469	55297.3	0	0	0	67864.4	0	0	62629.6	0	0	72732.1	0	0	0	106026	0	0
Metabolite: L-ALANINE	Formula: C3H7NO2	Mass: 89.04768
-----------------------------------------------------------------------------
Group: 1
L-Alanine C3H7NO2	blank1r	blank2r	blank3r	blank4	blank5	blank6	pooled_1	pooled_10	pooled_11	pooled_2	pooled_3	pooled_4	pooled_5	pooled_6	pooled_7	pooled_8	pooled_9	JK05	JK06	JK13	JK14	JK07	JK08	JK15	JK16	JK01	JK02	JK09	JK10	JK03	JK04	JK11	JK12
L-Alanine 0	0	0	0	1.61382e+06	1.37294e+06	1.44371e+06	4.70999e+07	6.39391e+07	7.06031e+07	4.69926e+07	4.6514e+07	4.73148e+07	4.80872e+07	4.89544e+07	4.67665e+07	5.62471e+07	6.39741e+07	2.74429e+08	1.30454e+08	2.2652e+08	1.8984e+08	7.50252e+07	8.16608e+07	6.52607e+07	7.26568e+07	1.7678e+08	222413483	2.74191e+08	3.13621e+08	2.28579e+08	2.45193e+08	2.77179e+08	2.40869e+08
L-Alanine 1	0	0	0	0	0	0	1.47088e+06	2.00459e+06	2.28023e+06	1.36993e+06	1.38343e+06	1.40022e+06	1.46978e+06	1.41834e+06	1.34137e+06	1.83324e+06	1.88976e+06	8.76292e+06	3.96028e+06	7.17121e+06	5.80312e+06	2.10511e+06	2.68176e+06	2.12043e+06	2.19941e+06	5.46741e+06	7.19884e+06	9.25562e+06	1.03677e+07	7.37519e+06	7.87203e+06	8.97632e+06	7.69759e+06
L-Alanine 2	0	0	0	0	0	0	288807	396328	460457	190686	257096	212790	212099	353193	316127	389061	453384	0	0	0	0	4.81295e+06	5.39096e+06	4.96998e+06	4.70649e+06	0	0	0	0	1.49318e+06	1.5803e+06	2.25801e+06	1.74492e+06
L-Alanine 3	0	0	0	159748	123584	102004	1.05629e+07	1.38302e+07	1.52986e+07	1.02218e+07	1.00425e+07	1.05337e+07	1.02946e+07	1.05765e+07	1.025e+07	1.26932e+07	1.42324e+07	532638	380635	202801	821706	1.28469e+08	1.43844e+08	1.37833e+08	1.40965e+08	265774	1.57596e+06	345063	1.13734e+06	4.7777e+07	5.14193e+07	6.03534e+07	4.92196e+07
Metabolite: L-ARABINOSE	Formula: C5H10O5	Mass: 150.0528
-----------------------------------------------------------------------------
Group: 1
L-Arabinose C5H10O5	blank1r	blank2r	blank3r	blank4	blank5	blank6	pooled_1	pooled_10	pooled_11	pooled_2	pooled_3	pooled_4	pooled_5	pooled_6	pooled_7	pooled_8	pooled_9	JK05	JK06	JK13	JK14	JK07	JK08	JK15	JK16	JK01	JK02	JK09	JK10	JK03	JK04	JK11	JK12
L-Arabinose 0	125778	65586	105595	297748	425291	348004	494612	274437	218129	519502	472850	428324	446601	387678	418948	367573	322394	715103	809537	854917	525584	590396	708698	826711	713859	479141	490552	587605	536014	638157	649036	552722	535409
L-Arabinose 1	0	0	0	0	0	0	0	0	0	0	0	0	0	0	0	0	0	0	0	0	0	0	0	0	0	0	0	0	0	0	0	0	0
L-Arabinose 2	0	0	0	0	0	0	0	0	0	0	0	0	0	0	0	0	0	0	0	0	0	0	0	0	0	0	0	0	0	0	0	0	0
L-Arabinose 3	0	0	0	0	0	0	0	0	0	0	0	0	0	0	0	0	0	0	0	0	0	0	0	0	0	0	0	0	0	0	0	0	0
L-Arabinose 4	0	0	0	0	0	0	0	0	0	0	0	0	0	0	0	0	0	0	0	0	0	0	0	0	0	0	0	0	0	0	0	0	0
L-Arabinose 5	85391.1	0	16667.2	14968.2	39709.6	19893.3	77077.4	393991	287432	138199	192794	141416	156771	147029	247851	409603	382473	468367	286721	230207	537785	480023	213835	458196	595781	436048	480047	364590	442675	408741	411476	370503	257318
Group: 2
L-Arabinose C5H10O5	blank1r	blank2r	blank3r	blank4	blank5	blank6	pooled_1	pooled_10	pooled_11	pooled_2	pooled_3	pooled_4	pooled_5	pooled_6	pooled_7	pooled_8	pooled_9	JK05	JK06	JK13	JK14	JK07	JK08	JK15	JK16	JK01	JK02	JK09	JK10	JK03	JK04	JK11	JK12
L-Arabinose 0	183966	64853.3	60237.5	527897	526861	554129	2.20546e+06	1.99339e+06	1.51613e+06	2.14601e+06	1.85962e+06	1.96797e+06	2.03011e+06	1.98968e+06	1.73358e+06	1.91241e+06	2.00979e+06	3.00941e+06	4.38201e+06	3.94461e+06	2.28164e+06	3.31386e+06	3.19946e+06	5.00966e+06	2.88945e+06	2.27231e+06	2.39417e+06	1.67141e+06	1.96634e+06	1.6437e+06	2.20779e+06	2.08365e+06	1.88592e+06
L-Arabinose 1	0	0	0	0	0	0	0	0	0	0	0	0	0	0	0	0	0	0	0	0	0	0	0	0	0	0	0	0	0	0	0	0	0
L-Arabinose 2	0	0	0	0	0	0	0	0	0	0	0	0	0	0	0	0	0	0	0	0	0	0	0	0	0	0	0	0	0	0	0	0	0
L-Arabinose 3	0	0	0	0	0	0	0	0	0	0	0	0	0	0	0	0	0	0	0	0	0	0	0	0	0	0	0	0	0	0	0	0	0
L-Arabinose 4	0	0	0	0	0	0	0	0	0	0	0	0	0	0	0	0	0	0	0	0	0	0	0	0	0	0	0	0	0	0	0	0	0
L-Arabinose 5	197693	219017	486255	365615	428064	473197	3.13686e+07	2.75572e+07	2.7393e+07	3.08268e+07	3.06859e+07	3.11266e+07	3.07475e+07	3.14553e+07	2.91976e+07	2.79058e+07	2.9989e+07	7.3609e+07	5.6031e+07	6.71444e+07	6.45796e+07	6.26614e+07	6.86098e+07	6.83324e+07	6.95711e+07	7.15974e+07	1.01013e+08	7.16093e+07	6.68388e+07	6.3072e+07	6.69277e+07	6.3079e+07	6.107e+07
Group: 3
L-Arabinose C5H10O5	blank1r	blank2r	blank3r	blank4	blank5	blank6	pooled_1	pooled_10	pooled_11	pooled_2	pooled_3	pooled_4	pooled_5	pooled_6	pooled_7	pooled_8	pooled_9	JK05	JK06	JK13	JK14	JK07	JK08	JK15	JK16	JK01	JK02	JK09	JK10	JK03	JK04	JK11	JK12
L-Arabinose 0	87320	49273.4	124611	375021	376898	340034	747218	588647	405314	612996	708441	672511	653633	677589	627024	567904	502222	1.11303e+06	977208	1.3453e+06	749961	751947	1.03819e+06	1.02538e+06	830434	799452	717694	881306	976772	832380	996208	912568	819422
L-Arabinose 1	0	0	0	0	0	0	0	0	0	0	0	0	0	0	0	0	0	0	0	0	0	0	0	0	0	0	0	0	0	0	0	0	0
L-Arabinose 2	0	0	0	0	0	0	0	0	0	0	0	0	0	0	0	0	0	0	0	0	0	0	0	0	0	0	0	0	0	0	0	0	0
L-Arabinose 3	0	0	0	0	0	0	0	0	0	0	0	0	0	0	0	0	0	0	0	0	0	0	0	0	0	0	0	0	0	0	0	0	0
L-Arabinose 4	0	0	0	0	0	0	0	0	0	0	0	0	0	0	0	0	0	0	0	0	0	0	0	0	0	0	0	0	0	0	0	0	0
L-Arabinose 5	67415.4	0	0	0	0	0	23929.3	135983	106164	24016.2	44494.2	36342.4	55187.1	43543	99483.7	232312	134066	74491.8	23761.2	41641.6	119465	250491	117532	210378	318832	136799	121563	65483.1	154430	166067	96955.1	117633	56800
Group: 4
L-Arabinose C5H10O5	blank1r	blank2r	blank3r	blank4	blank5	blank6	pooled_1	pooled_10	pooled_11	pooled_2	pooled_3	pooled_4	pooled_5	pooled_6	pooled_7	pooled_8	pooled_9	JK05	JK06	JK13	JK14	JK07	JK08	JK15	JK16	JK01	JK02	JK09	JK10	JK03	JK04	JK11	JK12
L-Arabinose 0	40854.3	0	0	310674	279498	284672	739799	0	209846	490036	412769	506391	436598	462604	482903	146287	261335	437397	667765	548356	343142	295104	792760	483130	284956	1.33088e+06	1.6397e+06	975331	1.57012e+06	1.46351e+06	2.19792e+06	1.54646e+06	1.96283e+06
L-Arabinose 1	0	0	0	0	0	0	0	0	0	0	0	0	0	0	0	0	0	0	0	0	0	0	0	0	0	0	0	0	0	0	0	0	0
L-Arabinose 2	0	0	0	0	0	0	0	0	0	0	0	0	0	0	0	0	0	0	0	0	0	0	0	0	0	0	0	0	0	0	0	0	0
L-Arabinose 3	0	0	0	0	0	0	0	0	0	0	0	0	0	0	0	0	0	0	0	0	0	0	0	0	0	0	0	0	0	0	0	0	0
L-Arabinose 4	0	0	0	0	0	0	0	0	0	0	0	0	0	0	0	0	0	0	0	0	0	0	0	0	0	0	0	0	0	0	0	0	0
L-Arabinose 5	55802.5	41705.4	93688.7	112352	109358	122434	3.99049e+06	2.45255e+06	3.05974e+06	3.37198e+06	3.38499e+06	3.21938e+06	3.48111e+06	3.25361e+06	3.77419e+06	2.46245e+06	2.88224e+06	1.10696e+07	8.4864e+06	1.37166e+07	9.09036e+06	6.31434e+06	1.19357e+07	1.13065e+07	9.52197e+06	8.66459e+06	9.78565e+06	8.66791e+06	1.09633e+07	9.48628e+06	1.15228e+07	1.0668e+07	1.16352e+07
Metabolite: L-ARGININE	Formula: C6H14N4O2	Mass: 174.1117
-----------------------------------------------------------------------------
Group: 1
L-Arginine C6H14N4O2	blank1r	blank2r	blank3r	blank4	blank5	blank6	pooled_1	pooled_10	pooled_11	pooled_2	pooled_3	pooled_4	pooled_5	pooled_6	pooled_7	pooled_8	pooled_9	JK05	JK06	JK13	JK14	JK07	JK08	JK15	JK16	JK01	JK02	JK09	JK10	JK03	JK04	JK11	JK12
L-Arginine 0	151069	78775.6	63472	88396.8	72246.5	66640.6	6.82874e+07	6.8831e+07	6.25367e+07	6.75546e+07	6.5982e+07	6.65495e+07	6.7198e+07	6.81552e+07	6.79267e+07	6.68664e+07	6.69078e+07	3.25e+08	1.89241e+08	2.95501e+08	2.31659e+08	2.26293e+08	2.67479e+08	2.14917e+08	2.50477e+08	1.20214e+08	1.35837e+08	1.32641e+08	1.47597e+08	2.21883e+08	2.36926e+08	216094567	2.07791e+08
L-Arginine 1	0	0	0	0	0	0	4.40963e+06	4.46083e+06	4.14465e+06	4.36802e+06	4.18823e+06	4.296e+06	4.28577e+06	4.28951e+06	4.24955e+06	4.30516e+06	4.37438e+06	2.1063e+07	1.23325e+07	1.94033e+07	1.52078e+07	1.46976e+07	1.72628e+07	1.38047e+07	1.62665e+07	7.84154e+06	8.64122e+06	8.56355e+06	9.65519e+06	1.42791e+07	1.55262e+07	1.40246e+07	1.35681e+07
L-Arginine 2	0	0	0	0	0	0	0	0	0	0	0	0	0	0	0	0	0	0	0	0	0	0	0	0	0	0	0	0	0	28372.2	0	0	0
L-Arginine 3	0	0	0	0	0	0	0	0	0	0	0	0	0	0	0	0	0	0	0	0	0	0	0	0	0	0	0	0	0	0	0	0	0
L-Arginine 4	0	0	0	0	0	0	0	0	0	0	0	0	0	0	0	0	0	0	0	0	0	0	0	0	0	0	0	0	0	0	0	0	0
L-Arginine 5	0	0	0	0	0	0	0	0	0	0	0	0	0	0	0	0	0	0	0	0	0	0	0	0	0	0	0	0	0	0	0	0	0
L-Arginine 6	0	0	0	0	0	0	0	0	0	0	0	0	0	0	0	0	0	0	0	0	0	0	0	0	0	0	0	0	0	0	0	0	0
Metabolite: L-ARGININE PHOSPHATE	Formula: C6H15N4O5P	Mass: 254.078
-----------------------------------------------------------------------------
Group: 1
L-Arginine phosphate C6H15N4O5P	blank1r	blank2r	blank3r	blank4	blank5	blank6	pooled_1	pooled_10	pooled_11	pooled_2	pooled_3	pooled_4	pooled_5	pooled_6	pooled_7	pooled_8	pooled_9	JK05	JK06	JK13	JK14	JK07	JK08	JK15	JK16	JK01	JK02	JK09	JK10	JK03	JK04	JK11	JK12
L-Arginine phosphate 0	0	0	0	0	0	0	9.47089e+06	5.74437e+06	7.75022e+06	8.57659e+06	8.37825e+06	8.52367e+06	8.62989e+06	8.59003e+06	8.91e+06	6.31003e+06	7.31727e+06	1.37622e+07	3.15536e+07	4.32337e+07	3.73353e+07	2.72209e+07	3.43938e+07	4.28269e+07	3.46238e+07	1.31662e+07	1.4452e+07	2.34697e+07	2.11417e+07	2.74988e+07	2.62415e+07	2.60197e+07	2.66001e+07
L-Arginine phosphate 1	0	0	0	0	0	0	523766	148185	465629	428183	452311	472885	439315	435800	528508	124524	347247	807249	1.93329e+06	2.67833e+06	2.38064e+06	1.65791e+06	2.21498e+06	2.73078e+06	2.16841e+06	764397	880680	1.36484e+06	1.23322e+06	1.46607e+06	1.61329e+06	1.45922e+06	1.70678e+06
L-Arginine phosphate 2	0	0	0	0	0	0	0	0	0	0	0	0	0	0	0	0	0	0	0	0	0	0	0	0	0	0	0	0	0	0	0	0	0
L-Arginine phosphate 3	0	0	0	0	0	0	0	0	0	0	0	0	0	0	0	0	0	0	0	0	0	0	0	0	0	0	0	0	0	0	0	0	0
L-Arginine phosphate 4	0	0	0	0	0	0	0	0	0	0	0	0	0	0	0	0	0	0	0	0	0	0	0	0	0	0	0	0	0	0	0	0	0
L-Arginine phosphate 5	0	0	0	0	0	0	0	0	0	0	0	0	0	0	0	0	0	0	0	0	0	0	0	0	0	0	0	0	0	0	0	0	0
L-Arginine phosphate 6	0	0	0	0	0	0	0	0	0	0	0	0	0	0	0	0	0	0	0	0	0	0	0	0	0	0	0	0	0	0	0	0	0
Metabolite: L-ASPARAGINE	Formula: C4H8N2O3	Mass: 132.0535
-----------------------------------------------------------------------------
Group: 1
L-Asparagine C4H8N2O3	blank1r	blank2r	blank3r	blank4	blank5	blank6	pooled_1	pooled_10	pooled_11	pooled_2	pooled_3	pooled_4	pooled_5	pooled_6	pooled_7	pooled_8	pooled_9	JK05	JK06	JK13	JK14	JK07	JK08	JK15	JK16	JK01	JK02	JK09	JK10	JK03	JK04	JK11	JK12
L-Asparagine 0	0	35562.4	0	29720.3	29879.3	0	3.77277e+07	3.64008e+07	3.95661e+07	3.65568e+07	3.72662e+07	3.70901e+07	3.80797e+07	3.76519e+07	3.56285e+07	3.46142e+07	3.78114e+07	1.23487e+08	5.245e+07	7.9317e+07	7.57077e+07	6.09122e+07	9.23129e+07	6.97483e+07	7.33847e+07	5.95032e+07	9.58937e+07	1.03675e+08	1.08113e+08	8.76909e+07	9.29221e+07	1.02956e+08	1.03882e+08
L-Asparagine 1	0	0	0	0	0	0	1.51069e+06	1.36573e+06	1.54664e+06	1.51774e+06	1.50266e+06	1.39883e+06	1.55703e+06	1.53786e+06	1.32597e+06	1.43038e+06	1.45927e+06	5.00731e+06	1.79199e+06	2.94895e+06	3.13804e+06	2.39914e+06	3.52858e+06	2.85758e+06	2.94867e+06	2.1212e+06	3.86185e+06	4.13663e+06	4.37426e+06	3.41712e+06	3.5945e+06	4.05714e+06	4.05148e+06
L-Asparagine 2	0	0	0	0	0	0	0	35332	32427.6	25923.9	36576.4	0	0	21075.5	0	0	37374.1	0	0	0	0	179703	219733	306465	234978	0	0	0	0	0	71310.8	103031	72713.7
L-Asparagine 3	0	0	0	0	0	0	286375	230928	244392	273700	271738	265011	266484	280146	243079	280939	309397	0	0	0	0	1.86419e+06	2.77775e+06	2.80746e+06	2.72648e+06	0	0	0	0	667229	550033	767017	876741
L-Asparagine 4	0	0	0	0	0	0	0	0	0	0	0	0	0	0	0	0	0	0	0	0	0	0	0	0	0	0	0	0	0	0	0	0	0
Metabolite: L-ASPARTATE	Formula: C4H7NO4	Mass: 133.0375
-----------------------------------------------------------------------------
Group: 1
L-Aspartate C4H7NO4	blank1r	blank2r	blank3r	blank4	blank5	blank6	pooled_1	pooled_10	pooled_11	pooled_2	pooled_3	pooled_4	pooled_5	pooled_6	pooled_7	pooled_8	pooled_9	JK05	JK06	JK13	JK14	JK07	JK08	JK15	JK16	JK01	JK02	JK09	JK10	JK03	JK04	JK11	JK12
L-Aspartate 0	192573	0	161348	287618	268032	297473	2.7845e+07	1.65827e+07	1.86921e+07	2.31682e+07	2.29767e+07	2.34541e+07	2.27336e+07	2.36197e+07	2.30547e+07	1.77401e+07	2.00716e+07	1.24958e+08	1.03045e+08	2.21276e+08	1.51267e+08	3.31464e+07	5.4397e+07	6.15511e+07	5.8967e+07	1.13926e+08	7.59079e+07	9.3393e+07	1.00198e+08	2.83024e+07	5.44757e+07	5.70752e+07	1.03857e+08
L-Aspartate 1	0	0	0	0	0	0	1.18516e+06	623788	704663	871814	876262	831793	955353	867332	924810	618832	854684	5.31476e+06	4.28226e+06	9.35598e+06	6.41667e+06	1.65731e+06	2.62803e+06	3.11069e+06	3.25166e+06	4.85878e+06	3.12192e+06	3.7184e+06	4.09417e+06	1.25349e+06	2.54222e+06	2.59848e+06	4.60448e+06
L-Aspartate 2	0	0	0	0	0	0	1.12478e+06	517288	691759	966687	880675	900958	934694	911808	865404	658596	723227	0	0	0	0	7.48164e+06	1.26784e+07	1.79193e+07	1.66639e+07	0	0	0	0	1.20723e+06	3.12533e+06	4.20053e+06	8.2801e+06
L-Aspartate 3	0	0	0	0	0	0	4.46496e+06	2.73096e+06	3.06181e+06	3.59994e+06	3.68682e+06	3.81481e+06	3.92414e+06	4.03814e+06	3.79698e+06	2.75551e+06	3.28803e+06	0	0	0	0	3.20995e+07	5.2854e+07	7.77758e+07	7.86885e+07	0	0	0	0	3.24349e+06	6.51016e+06	8.41348e+06	1.73413e+07
L-Aspartate 4	0	0	0	0	0	0	0	0	0	0	0	0	0	0	0	0	0	0	0	0	0	399739	641576	1.07344e+06	994667	0	0	0	0	0	0	0	0
Group: 2
L-Aspartate C4H7NO4	blank1r	blank2r	blank3r	blank4	blank5	blank6	pooled_1	pooled_10	pooled_11	pooled_2	pooled_3	pooled_4	pooled_5	pooled_6	pooled_7	pooled_8	pooled_9	JK05	JK06	JK13	JK14	JK07	JK08	JK15	JK16	JK01	JK02	JK09	JK10	JK03	JK04	JK11	JK12
L-Aspartate 0	575983	188639	803910	673916	699198	742849	1.81539e+06	1.47687e+06	1.42482e+06	1.69838e+06	1.72163e+06	1.52927e+06	1.642e+06	1.62968e+06	1.57387e+06	1.48506e+06	1.52042e+06	3.44134e+06	2.83237e+06	3.40889e+06	3.25341e+06	1.97896e+06	2.22098e+06	2.52368e+06	2.42941e+06	2.20927e+06	2.44655e+06	2.34841e+06	3.03767e+06	1.68101e+06	1.82056e+06	1.95584e+06	2.29058e+06
L-Aspartate 1	0	0	0	0	0	0	0	0	0	0	0	0	0	0	0	0	0	0	0	0	0	0	0	0	0	0	0	0	0	0	0	0	0
L-Aspartate 2	0	0	0	0	0	0	0	0	0	0	0	0	0	0	0	0	0	0	0	0	0	0	0	117596	110622	0	0	0	0	0	0	0	0
L-Aspartate 3	0	0	0	0	0	0	0	0	0	0	0	0	0	0	0	0	0	0	0	0	0	172400	192757	896927	973526	0	0	0	0	0	0	0	0
L-Aspartate 4	0	0	0	0	0	0	0	0	0	0	0	0	0	0	0	0	0	0	0	0	0	0	0	0	0	0	0	0	0	0	0	0	0
Metabolite: L-CITRULLINE	Formula: C6H13N3O3	Mass: 175.0957
-----------------------------------------------------------------------------
Group: 1
L-Citrulline C6H13N3O3	blank1r	blank2r	blank3r	blank4	blank5	blank6	pooled_1	pooled_10	pooled_11	pooled_2	pooled_3	pooled_4	pooled_5	pooled_6	pooled_7	pooled_8	pooled_9	JK05	JK06	JK13	JK14	JK07	JK08	JK15	JK16	JK01	JK02	JK09	JK10	JK03	JK04	JK11	JK12
L-Citrulline 0	0	0	0	0	0	0	183098	95760.1	168730	186117	152368	170158	141169	135766	174164	88464.3	137893	597518	479461	494573	362073	314276	628410	523457	358848	389168	943998	635608	698978	456152	533804	525583	411469
L-Citrulline 1	0	0	0	0	0	0	0	0	0	0	0	0	0	0	0	0	0	0	0	0	0	0	0	0	0	0	0	0	0	0	0	0	0
L-Citrulline 2	0	0	0	0	0	0	0	0	0	0	0	0	0	0	0	0	0	0	0	0	0	0	0	0	0	0	0	0	0	0	0	0	0
L-Citrulline 3	0	0	0	0	0	0	0	0	0	0	0	0	0	0	0	0	0	0	0	0	0	0	0	0	0	0	0	0	0	0	0	0	0
L-Citrulline 4	0	0	0	0	0	0	0	0	0	0	0	0	0	0	0	0	0	0	0	0	0	0	0	0	0	0	0	0	0	0	0	0	0
L-Citrulline 5	0	0	0	0	0	0	0	0	0	0	0	0	0	0	0	0	0	0	0	0	0	0	0	0	0	0	0	0	0	0	0	0	0
L-Citrulline 6	0	0	0	0	0	0	0	0	0	0	0	0	0	0	0	0	0	0	0	0	0	0	0	0	0	0	0	0	0	0	0	0	0
Metabolite: L-CYSTATHIONINE	Formula: C7H14N2O4S	Mass: 222.0674
-----------------------------------------------------------------------------
Group: 1
L-Cystathionine C7H14N2O4S	blank1r	blank2r	blank3r	blank4	blank5	blank6	pooled_1	pooled_10	pooled_11	pooled_2	pooled_3	pooled_4	pooled_5	pooled_6	pooled_7	pooled_8	pooled_9	JK05	JK06	JK13	JK14	JK07	JK08	JK15	JK16	JK01	JK02	JK09	JK10	JK03	JK04	JK11	JK12
L-Cystathionine 0	0	0	0	0	0	0	1.12283e+06	792788	1.01713e+06	1.06159e+06	1.07137e+06	976622	980567	1.09826e+06	1.05206e+06	902121	932786	3.8618e+06	2.37648e+06	2.86036e+06	2.19285e+06	2.51012e+06	3.50624e+06	2.19103e+06	2.41183e+06	3.31166e+06	3.89232e+06	3.39197e+06	4.43386e+06	3.99804e+06	4.98285e+06	4.10439e+06	4.05658e+06
L-Cystathionine 1	0	0	0	0	0	0	0	0	52294.7	0	0	0	0	0	19277.9	0	0	92460.4	67780	152611	36557	99148.7	218288	58167.3	50317.2	141646	198058	0	200729	86110.1	251648	76806.3	191450
L-Cystathionine 2	0	0	0	0	0	0	0	0	0	0	0	0	0	0	0	0	0	0	0	0	0	0	0	0	0	0	0	0	0	0	0	0	0
L-Cystathionine 3	0	0	0	0	0	0	0	0	0	0	0	0	0	0	0	0	0	0	0	0	0	0	0	0	0	0	0	0	0	0	0	0	0
L-Cystathionine 4	0	0	0	0	0	0	0	0	0	0	0	0	0	0	0	0	0	0	0	0	0	0	0	0	0	0	0	0	0	0	0	0	0
L-Cystathionine 5	0	0	0	0	0	0	0	0	0	0	0	0	0	0	0	0	0	0	0	0	0	0	0	0	0	0	0	0	0	0	0	0	0
L-Cystathionine 6	0	0	0	0	0	0	0	0	0	0	0	0	0	0	0	0	0	0	0	0	0	0	0	0	0	0	0	0	0	0	0	0	0
L-Cystathionine 7	0	0	0	0	0	0	0	0	0	0	0	0	0	0	0	0	0	0	0	0	0	0	0	0	0	0	0	0	0	0	0	0	0
Metabolite: L-CYSTEINE	Formula: C3H7NO2S	Mass: 121.0197
-----------------------------------------------------------------------------
Group: 1
L-Cysteine C3H7NO2S	blank1r	blank2r	blank3r	blank4	blank5	blank6	pooled_1	pooled_10	pooled_11	pooled_2	pooled_3	pooled_4	pooled_5	pooled_6	pooled_7	pooled_8	pooled_9	JK05	JK06	JK13	JK14	JK07	JK08	JK15	JK16	JK01	JK02	JK09	JK10	JK03	JK04	JK11	JK12
L-Cysteine 0	0	0	0	0	0	0	190268	269869	281220	226352	170967	190853	205526	223381	205794	296521	310491	1.87895e+06	2.01144e+06	1.91414e+06	1.44672e+06	643548	1.60849e+06	1.94027e+06	1.3945e+06	1.05621e+06	1.03575e+06	815725	1.05749e+06	1.0713e+06	900919	848502	459992
L-Cysteine 1	0	0	0	0	0	0	0	0	0	0	0	0	0	0	0	0	0	0	0	0	16163.6	0	0	0	0	0	0	0	0	0	0	0	0
L-Cysteine 2	0	0	0	0	0	0	0	0	0	0	0	0	0	0	0	0	0	0	0	0	0	0	0	0	0	0	0	0	0	0	0	0	0
L-Cysteine 3	0	0	0	0	0	0	0	0	0	0	0	0	0	0	0	0	0	0	0	0	0	0	0	0	0	0	0	0	0	0	0	0	0
Metabolite: L-CYSTINE	Formula: C6H12N2O4S2	Mass: 240.0238
-----------------------------------------------------------------------------
Group: 1
L-Cystine C6H12N2O4S2	blank1r	blank2r	blank3r	blank4	blank5	blank6	pooled_1	pooled_10	pooled_11	pooled_2	pooled_3	pooled_4	pooled_5	pooled_6	pooled_7	pooled_8	pooled_9	JK05	JK06	JK13	JK14	JK07	JK08	JK15	JK16	JK01	JK02	JK09	JK10	JK03	JK04	JK11	JK12
L-Cystine 0	0	0	0	0	0	0	684750	264269	429790	524350	498393	494490	494662	469585	540672	356861	412352	1.30536e+06	3.47476e+06	4.41924e+06	1.36324e+06	1.7378e+06	1.61758e+06	3.64067e+06	2.20681e+06	1.50753e+06	727718	400077	731658	1.21617e+06	1.63624e+06	1.15244e+06	927965
L-Cystine 1	0	0	0	0	0	0	0	0	0	0	0	0	0	0	0	0	0	0	154558	86981.2	0	0	0	109636	0	0	0	0	0	0	0	0	0
L-Cystine 2	0	0	0	0	0	0	0	0	0	0	0	0	0	0	0	0	0	0	0	0	0	0	0	0	0	0	0	0	0	0	0	0	0
L-Cystine 3	0	0	0	0	0	0	0	0	0	0	0	0	0	0	0	0	0	0	0	0	0	0	0	0	0	0	0	0	0	0	0	0	0
L-Cystine 4	0	0	0	0	0	0	0	0	0	0	0	0	0	0	0	0	0	0	0	0	0	0	0	0	0	0	0	0	0	0	0	0	0
L-Cystine 5	0	0	0	0	0	0	0	0	0	0	0	0	0	0	0	0	0	0	0	0	0	0	0	0	0	0	0	0	0	0	0	0	0
L-Cystine 6	0	0	0	0	0	0	0	0	0	0	0	0	0	0	0	0	0	0	0	0	0	0	0	0	0	0	0	0	0	0	0	0	0
Metabolite: L-GLUTAMATE	Formula: C5H9NO4	Mass: 147.0532
-----------------------------------------------------------------------------
Group: 1
L-Glutamate C5H9NO4	blank1r	blank2r	blank3r	blank4	blank5	blank6	pooled_1	pooled_10	pooled_11	pooled_2	pooled_3	pooled_4	pooled_5	pooled_6	pooled_7	pooled_8	pooled_9	JK05	JK06	JK13	JK14	JK07	JK08	JK15	JK16	JK01	JK02	JK09	JK10	JK03	JK04	JK11	JK12
L-Glutamate 0	806951	576197	1.13439e+06	893787	940962	927282	1.13494e+08	6.94557e+07	8.47189e+07	9.92067e+07	9.82974e+07	9.9789e+07	1.00472e+08	1.02489e+08	9.49422e+07	7.54915e+07	8.29273e+07	4.36171e+08	3.07983e+08	5.12874e+08	4.59781e+08	2.53675e+08	3.77969e+08	4.4004e+08	4.14965e+08	8.81093e+07	8.36512e+07	1.75404e+08	1.92632e+08	3.72252e+08	3.12464e+08	4.10755e+08	3.65015e+08
L-Glutamate 1	0	0	0	0	0	0	6.00682e+06	3.73987e+06	4.56263e+06	5.4447e+06	5.60193e+06	5.39481e+06	5.3831e+06	5.41216e+06	5.14231e+06	4.15777e+06	4.34432e+06	2.41489e+07	1.72839e+07	2.7561e+07	2.51273e+07	1.36048e+07	2.08889e+07	2.36166e+07	2.31605e+07	4.55178e+06	4.21014e+06	9.58693e+06	1.0565e+07	2.02676e+07	1.6704e+07	2.2485e+07	2.00133e+07
L-Glutamate 2	0	0	0	0	0	0	605977	303303	423122	526473	507414	489767	485237	521835	442656	327325	418220	278333	223511	313044	362195	2.79602e+06	4.57648e+06	4.59399e+06	5.45619e+06	0	0	0	0	2.93573e+06	2.84023e+06	4.02403e+06	3.80756e+06
L-Glutamate 3	0	0	0	0	0	0	0	25572.4	0	0	0	0	39373	0	0	0	25596.8	0	0	0	0	339838	685534	784950	828820	0	0	0	0	345190	129232	573502	301181
L-Glutamate 4	0	0	0	0	0	0	38760.5	0	45867.9	48563.2	28058.8	43915.2	37900.6	59977.5	32904.8	0	33115.4	0	0	0	0	856128	1.46802e+06	1.63903e+06	1.93633e+06	0	0	0	0	67001.2	0	171440	115083
L-Glutamate 5	0	0	0	0	0	0	0	0	0	0	0	0	0	0	0	0	0	0	0	0	0	82088	162214	96457	171600	0	0	0	0	0	0	0	0
Group: 2
L-Glutamate C5H9NO4	blank1r	blank2r	blank3r	blank4	blank5	blank6	pooled_1	pooled_10	pooled_11	pooled_2	pooled_3	pooled_4	pooled_5	pooled_6	pooled_7	pooled_8	pooled_9	JK05	JK06	JK13	JK14	JK07	JK08	JK15	JK16	JK01	JK02	JK09	JK10	JK03	JK04	JK11	JK12
L-Glutamate 0	4.18244e+06	2.2734e+06	4.39991e+06	3.61994e+06	3.76609e+06	3.78458e+06	1.18795e+07	1.22467e+07	1.12362e+07	1.23536e+07	1.18947e+07	1.19522e+07	1.21821e+07	1.20141e+07	1.21878e+07	1.24107e+07	1.18923e+07	3.74984e+07	2.43503e+07	3.17202e+07	2.61637e+07	2.31534e+07	2.69128e+07	2.13039e+07	2.09921e+07	3.0137e+07	3.80917e+07	4.11912e+07	4.03867e+07	3.9636e+07	4.1208e+07	3.96595e+07	3.80293e+07
L-Glutamate 1	0	0	0	24037.9	0	0	350064	386438	330424	385827	360241	324721	307087	377616	434282	425324	336826	1.7242e+06	935591	1.27863e+06	972192	1.00191e+06	1.17563e+06	892992	869760	1.28303e+06	1.68453e+06	1.85498e+06	1.85411e+06	1.81232e+06	2.1146e+06	1.83878e+06	1.7545e+06
L-Glutamate 2	0	0	0	0	0	0	521466	535556	392003	494068	433249	522575	539128	460022	446025	570202	489494	0	0	0	0	5.36673e+06	6.56968e+06	4.9161e+06	5.09293e+06	0	0	0	0	3.67774e+06	3.76672e+06	3.59904e+06	3.6166e+06
L-Glutamate 3	0	0	0	0	0	0	0	0	0	0	0	0	0	0	0	0	0	0	0	0	0	109609	100464	121016	41664.8	0	0	0	0	35725.7	60087.9	33632.4	35060.2
L-Glutamate 4	0	0	0	0	0	0	0	0	0	0	0	0	0	0	0	0	0	0	0	0	0	0	0	0	0	0	0	0	0	0	0	0	0
L-Glutamate 5	0	0	0	0	0	0	0	0	0	0	0	0	0	0	0	0	0	0	0	0	0	0	0	0	0	0	0	0	0	0	0	0	0
Metabolite: L-GLUTAMATE 5-SEMIALDEHYDE	Formula: C5H9NO3	Mass: 131.0582
-----------------------------------------------------------------------------
Group: 1
L-Glutamate 5-semialdehyde C5H9NO3	blank1r	blank2r	blank3r	blank4	blank5	blank6	pooled_1	pooled_10	pooled_11	pooled_2	pooled_3	pooled_4	pooled_5	pooled_6	pooled_7	pooled_8	pooled_9	JK05	JK06	JK13	JK14	JK07	JK08	JK15	JK16	JK01	JK02	JK09	JK10	JK03	JK04	JK11	JK12
L-Glutamate 5-semialdehyde 0	1.94787e+06	1.4367e+06	1.26535e+06	974709	1.00321e+06	1.04664e+06	5.45743e+06	5.23569e+06	5.41574e+06	5.28381e+06	5.17296e+06	5.49198e+06	5.47936e+06	5.29489e+06	4.90877e+06	5.25127e+06	5.2823e+06	1.39375e+07	8.43486e+06	1.25062e+07	1.15132e+07	1.08384e+07	1.31815e+07	1.17981e+07	1.21718e+07	1.00102e+07	1.45918e+07	1.19313e+07	1.3743e+07	1.22869e+07	1.27694e+07	1.34715e+07	1.20536e+07
L-Glutamate 5-semialdehyde 1	0	0	0	0	0	0	109443	143264	179600	175928	169877	168830	115315	159129	143562	210000	187927	493335	245449	395665	369652	453710	504477	407640	464096	359630	613215	237254	397067	502979	326733	377830	291021
L-Glutamate 5-semialdehyde 2	0	0	0	0	0	0	0	0	0	0	0	0	0	0	0	0	0	0	0	0	0	0	0	0	0	0	0	0	0	0	0	0	0
L-Glutamate 5-semialdehyde 3	0	0	0	0	0	0	0	0	0	0	0	0	0	0	0	0	0	0	0	0	0	0	0	0	0	0	0	0	0	0	0	0	0
L-Glutamate 5-semialdehyde 4	0	0	0	0	0	0	0	0	0	0	0	0	0	0	0	0	0	0	0	0	0	0	0	0	0	0	0	0	0	0	0	0	0
L-Glutamate 5-semialdehyde 5	0	0	0	0	0	0	0	0	0	0	0	0	0	0	0	0	0	0	0	0	0	0	0	0	0	0	0	0	0	0	0	0	0
Metabolite: L-GLUTAMINE	Formula: C5H10N2O3	Mass: 146.0691
-----------------------------------------------------------------------------
Group: 1
L-Glutamine C5H10N2O3	blank1r	blank2r	blank3r	blank4	blank5	blank6	pooled_1	pooled_10	pooled_11	pooled_2	pooled_3	pooled_4	pooled_5	pooled_6	pooled_7	pooled_8	pooled_9	JK05	JK06	JK13	JK14	JK07	JK08	JK15	JK16	JK01	JK02	JK09	JK10	JK03	JK04	JK11	JK12
L-Glutamine 0	0	0	44256.6	0	0	0	7.2073e+07	5.87583e+07	6.2016e+07	6.57295e+07	6.52001e+07	6.58266e+07	6.53771e+07	6.73497e+07	6.48383e+07	5.91546e+07	6.32024e+07	1.7593e+08	1.63204e+08	2.45912e+08	1.59855e+08	1.22278e+08	1.75902e+08	2.01041e+08	1.80158e+08	2.43452e+08	2.34107e+08	2.57237e+08	2.86193e+08	1.70542e+08	2.53996e+08	2.56788e+08	3.13174e+08
L-Glutamine 1	0	0	0	0	0	0	3.86459e+06	3.28079e+06	3.35721e+06	3.51791e+06	3.46135e+06	3.78922e+06	3.49085e+06	3.64599e+06	3.52887e+06	3.26358e+06	3.31033e+06	9.72052e+06	8.94365e+06	1.4109e+07	8.45303e+06	6.8691e+06	9.72609e+06	1.08909e+07	9.10532e+06	1.34818e+07	1.28111e+07	1.34983e+07	1.56911e+07	9.35068e+06	1.32612e+07	1.41489e+07	1.70573e+07
L-Glutamine 2	0	0	0	0	0	0	0	0	0	0	0	0	0	0	0	0	0	0	0	0	0	0	0	0	0	128947	0	0	0	0	0	0	0
L-Glutamine 3	0	0	0	0	0	0	0	0	0	0	0	0	0	0	0	0	0	0	0	0	0	0	0	0	0	0	0	0	0	0	0	0	0
L-Glutamine 4	0	0	0	0	0	0	0	0	0	0	0	0	0	0	0	0	0	0	0	0	0	0	0	0	0	0	0	0	0	0	0	0	0
L-Glutamine 5	0	0	0	0	0	0	0	0	0	0	0	0	0	0	0	0	0	0	0	0	0	0	0	0	0	0	0	0	0	0	0	0	0
Metabolite: L-HISTIDINE	Formula: C6H9N3O2	Mass: 155.0695
-----------------------------------------------------------------------------
Group: 1
L-Histidine C6H9N3O2	blank1r	blank2r	blank3r	blank4	blank5	blank6	pooled_1	pooled_10	pooled_11	pooled_2	pooled_3	pooled_4	pooled_5	pooled_6	pooled_7	pooled_8	pooled_9	JK05	JK06	JK13	JK14	JK07	JK08	JK15	JK16	JK01	JK02	JK09	JK10	JK03	JK04	JK11	JK12
L-Histidine 0	0	0	254917	0	230221	256856	2.57629e+07	2.29174e+07	2.29305e+07	2.57401e+07	2.53779e+07	2.57865e+07	2.55783e+07	2.60988e+07	2.39018e+07	2.35522e+07	2.51737e+07	5.74483e+07	4.57347e+07	5.22006e+07	52449178	5.34496e+07	5.39409e+07	5.48868e+07	5.78056e+07	5.88406e+07	8.4461e+07	5.72482e+07	4.92797e+07	4.84141e+07	5.08783e+07	4.64587e+07	4.42897e+07
L-Histidine 1	0	0	0	0	0	0	1.54629e+06	1.35646e+06	1.3971e+06	1.42747e+06	1.57639e+06	1.46652e+06	1.57569e+06	1.49857e+06	1.44986e+06	1.39275e+06	1.53106e+06	3.31894e+06	2.59348e+06	3.57864e+06	3.25914e+06	3.28996e+06	3.33888e+06	3.44733e+06	3.67867e+06	3.46072e+06	5.38916e+06	3.63898e+06	3.106e+06	3.0138e+06	3.04216e+06	2.88391e+06	2.94705e+06
L-Histidine 2	0	0	0	0	0	0	0	0	0	0	0	0	0	0	0	0	0	0	0	0	0	0	0	0	0	0	0	0	0	0	0	0	0
L-Histidine 3	0	0	0	0	0	0	0	0	0	0	0	0	0	0	0	0	0	0	0	0	0	0	0	0	0	0	0	0	0	0	0	0	0
L-Histidine 4	0	0	0	0	0	0	0	0	0	0	0	0	0	0	0	0	0	0	0	0	0	0	0	0	0	0	0	0	0	0	0	0	0
L-Histidine 5	0	0	0	0	0	0	0	0	0	0	0	0	0	0	0	0	0	0	0	0	0	0	0	0	0	0	0	0	0	0	0	0	0
L-Histidine 6	0	0	0	0	0	0	0	0	0	0	0	0	0	0	0	0	0	0	0	0	0	0	0	0	0	0	0	0	0	0	0	0	0
Group: 2
L-Histidine C6H9N3O2	blank1r	blank2r	blank3r	blank4	blank5	blank6	pooled_1	pooled_10	pooled_11	pooled_2	pooled_3	pooled_4	pooled_5	pooled_6	pooled_7	pooled_8	pooled_9	JK05	JK06	JK13	JK14	JK07	JK08	JK15	JK16	JK01	JK02	JK09	JK10	JK03	JK04	JK11	JK12
L-Histidine 0	128562	135812	279550	263198	288655	309657	7.22984e+06	5.51122e+06	6.3708e+06	6.82633e+06	6.58649e+06	6.68145e+06	6.97397e+06	6.75302e+06	6863442	5.68427e+06	6.17069e+06	2.05453e+07	1.39187e+07	2.25135e+07	1.60206e+07	1.18275e+07	1.95712e+07	1.91003e+07	1.59227e+07	1.46396e+07	1.8468e+07	1.70257e+07	1.94874e+07	1.64391e+07	2.01205e+07	1.89181e+07	2.0053e+07
L-Histidine 1	0	0	0	0	0	0	189957	75189.9	86041.3	141495	141860	112540	101326	137389	169826	94860.8	86229.2	764852	164256	826338	423681	242112	847171	615902	523288	477637	710313	605406	633192	487612	570376	600769	712656
L-Histidine 2	0	0	0	0	0	0	0	0	0	0	0	0	0	0	0	0	0	0	0	0	0	0	0	0	0	0	0	0	0	0	0	0	0
L-Histidine 3	0	0	0	0	0	0	0	0	0	0	0	0	0	0	0	0	0	0	0	0	0	0	0	0	0	0	0	0	0	0	0	0	0
L-Histidine 4	0	0	0	0	0	0	0	0	0	0	0	0	0	0	0	0	0	0	0	0	0	0	0	0	0	0	0	0	0	0	0	0	0
L-Histidine 5	0	0	0	0	0	0	0	0	0	0	0	0	0	0	0	0	0	0	0	0	0	0	0	0	0	0	0	0	0	0	0	0	0
L-Histidine 6	0	0	0	0	0	0	0	0	0	0	0	0	0	0	0	0	0	0	0	0	0	0	0	0	0	0	0	0	0	0	0	0	0
Group: 3
L-Histidine C6H9N3O2	blank1r	blank2r	blank3r	blank4	blank5	blank6	pooled_1	pooled_10	pooled_11	pooled_2	pooled_3	pooled_4	pooled_5	pooled_6	pooled_7	pooled_8	pooled_9	JK05	JK06	JK13	JK14	JK07	JK08	JK15	JK16	JK01	JK02	JK09	JK10	JK03	JK04	JK11	JK12
L-Histidine 0	0	0	0	76390.3	82417.2	0	2.14322e+06	1.32951e+06	1.75786e+06	1.85661e+06	1.73489e+06	1.72949e+06	1.87192e+06	1.78754e+06	1.97979e+06	1.28758e+06	1.63136e+06	4.90898e+06	5.14188e+06	8.67208e+06	4.78911e+06	3358650	5.95557e+06	5.82977e+06	4.90382e+06	4.50777e+06	4.47626e+06	4.28821e+06	5.04311e+06	4.79089e+06	5.86522e+06	5.16917e+06	6.27812e+06
L-Histidine 1	0	0	0	0	0	0	24447.9	0	0	27674.8	0	0	0	23995	0	0	0	116879	80392.7	428776	122025	41892.1	207388	204842	86094.8	96286.2	74820.8	102564	163905	79666.2	152600	47235.9	207366
L-Histidine 2	0	0	0	0	0	0	0	0	0	0	0	0	0	0	0	0	0	0	0	0	0	0	0	0	0	0	0	0	0	0	0	0	0
L-Histidine 3	0	0	0	0	0	0	0	0	0	0	0	0	0	0	0	0	0	0	0	0	0	0	0	0	0	0	0	0	0	0	0	0	0
L-Histidine 4	0	0	0	0	0	0	0	0	0	0	0	0	0	0	0	0	0	0	0	0	0	0	0	0	0	0	0	0	0	0	0	0	0
L-Histidine 5	0	0	0	0	0	0	0	0	0	0	0	0	0	0	0	0	0	0	0	0	0	0	0	0	0	0	0	0	0	0	0	0	0
L-Histidine 6	0	0	0	0	0	0	0	0	0	0	0	0	0	0	0	0	0	0	0	0	0	0	0	0	0	0	0	0	0	0	0	0	0
Group: 4
L-Histidine C6H9N3O2	blank1r	blank2r	blank3r	blank4	blank5	blank6	pooled_1	pooled_10	pooled_11	pooled_2	pooled_3	pooled_4	pooled_5	pooled_6	pooled_7	pooled_8	pooled_9	JK05	JK06	JK13	JK14	JK07	JK08	JK15	JK16	JK01	JK02	JK09	JK10	JK03	JK04	JK11	JK12
L-Histidine 0	0	0	0	0	0	0	672816	1.15267e+06	1.07186e+06	879434	837299	861325	827333	935848	766768	1.25089e+06	1.24796e+06	3.24795e+06	2.01064e+06	2.8675e+06	2.83927e+06	2.57144e+06	2.34046e+06	2.91163e+06	3.07581e+06	2.60323e+06	2.73564e+06	3.08125e+06	3.1578e+06	2.85921e+06	3.05249e+06	3.50094e+06	2.42869e+06
L-Histidine 1	0	0	0	0	0	0	0	0	0	0	0	0	0	0	0	0	0	101423	21889.3	84552.9	72804.6	85056.6	52099	59731	129721	78983.4	73067	93097.9	103453	89484.5	101132	137044	50965.2
L-Histidine 2	0	0	0	0	0	0	0	0	0	0	0	0	0	0	0	0	0	0	0	0	0	0	0	0	0	0	0	0	0	0	0	0	0
L-Histidine 3	0	0	0	0	0	0	0	0	0	0	0	0	0	0	0	0	0	0	0	0	0	0	0	0	0	0	0	0	0	0	0	0	0
L-Histidine 4	0	0	0	0	0	0	0	0	0	0	0	0	0	0	0	0	0	0	0	0	0	0	0	0	0	0	0	0	0	0	0	0	0
L-Histidine 5	0	0	0	0	0	0	0	0	0	0	0	0	0	0	0	0	0	0	0	0	0	0	0	0	0	0	0	0	0	0	0	0	0
L-Histidine 6	0	0	0	0	0	0	0	0	0	0	0	0	0	0	0	0	0	0	0	0	0	0	0	0	0	0	0	0	0	0	0	0	0
Metabolite: L-LEUCINE	Formula: C6H13NO2	Mass: 131.0946
-----------------------------------------------------------------------------
Group: 1
L-Leucine C6H13NO2	blank1r	blank2r	blank3r	blank4	blank5	blank6	pooled_1	pooled_10	pooled_11	pooled_2	pooled_3	pooled_4	pooled_5	pooled_6	pooled_7	pooled_8	pooled_9	JK05	JK06	JK13	JK14	JK07	JK08	JK15	JK16	JK01	JK02	JK09	JK10	JK03	JK04	JK11	JK12
L-Leucine 0	0	91629.2	149552	855977	777969	668523	2.2106e+07	2.56927e+07	2.72441e+07	2.28717e+07	2.21861e+07	2.19102e+07	2.3527e+07	2.28248e+07	2.39267e+07	2.41331e+07	2.38149e+07	5.49255e+07	8.379e+07	1.05413e+08	5.24432e+07	6.0651e+07	5.65406e+07	8.63315e+07	7.33323e+07	9.03628e+07	7.60799e+07	8.91593e+07	8.28864e+07	5.60892e+07	7.53325e+07	7.70788e+07	7.23594e+07
L-Leucine 1	0	0	0	0	0	0	1.38653e+06	1.64096e+06	1.67471e+06	1.42511e+06	1.46221e+06	1.41596e+06	1.46854e+06	1.46919e+06	1.44364e+06	1.43013e+06	1.46887e+06	3.36472e+06	5.28307e+06	6.43163e+06	3.30198e+06	3.85123e+06	3.34355e+06	5.39018e+06	4.73849e+06	5.60389e+06	4.80282e+06	5.92451e+06	5.15434e+06	3.76367e+06	4.93855e+06	4.65186e+06	4.60346e+06
L-Leucine 2	0	0	0	0	0	0	0	0	0	0	0	0	0	0	0	0	0	0	0	47259.9	0	0	0	0	0	0	0	27210.5	49561.8	0	0	37071.1	0
L-Leucine 3	0	0	0	0	0	0	0	0	0	0	0	0	0	0	0	0	0	0	0	0	0	0	0	0	0	0	0	0	0	0	0	0	0
L-Leucine 4	0	0	0	0	0	0	0	0	0	0	0	0	0	0	0	0	0	0	0	0	0	0	0	0	0	0	0	0	0	0	0	0	0
L-Leucine 5	0	0	0	0	0	0	0	0	0	0	0	0	0	0	0	0	0	0	0	0	0	0	0	0	0	0	0	0	0	0	0	0	0
L-Leucine 6	0	0	0	0	0	0	0	0	0	0	0	0	0	0	0	0	0	0	0	0	0	0	0	0	0	0	0	0	0	0	0	0	0
Group: 2
L-Leucine C6H13NO2	blank1r	blank2r	blank3r	blank4	blank5	blank6	pooled_1	pooled_10	pooled_11	pooled_2	pooled_3	pooled_4	pooled_5	pooled_6	pooled_7	pooled_8	pooled_9	JK05	JK06	JK13	JK14	JK07	JK08	JK15	JK16	JK01	JK02	JK09	JK10	JK03	JK04	JK11	JK12
L-Leucine 0	0	0	88895	635100	533589	516990	1.7716e+07	2.14837e+07	2.26944e+07	1.74997e+07	1.76262e+07	1.76748e+07	1.84058e+07	1.83609e+07	1.92413e+07	2.04425e+07	1.96625e+07	4.82334e+07	7.10629e+07	8.94137e+07	3.79556e+07	5.22035e+07	4.54029e+07	7.08656e+07	5.63864e+07	7.07524e+07	5.71297e+07	60883247	6.13709e+07	3.92506e+07	5.14996e+07	5.10431e+07	4.81327e+07
L-Leucine 1	0	0	0	0	0	0	1.13004e+06	1.42736e+06	1.45851e+06	1.17188e+06	1.15823e+06	1.12458e+06	1.13847e+06	1.2107e+06	1.17188e+06	1.29553e+06	1.25122e+06	3.14229e+06	4.82162e+06	5.90628e+06	2.46267e+06	3.40185e+06	2.91977e+06	4.68638e+06	3.70121e+06	4.58125e+06	3.64689e+06	3.98418e+06	4.03434e+06	2.57945e+06	3.22744e+06	3.42806e+06	3.09899e+06
L-Leucine 2	0	0	0	0	0	0	0	0	0	0	0	0	0	0	0	0	0	20260.9	41972.9	64735.2	0	0	25404.3	23048.4	41226.5	37661.7	39570.7	0	21773.3	0	0	18719.7	0
L-Leucine 3	0	0	0	0	0	0	0	0	0	0	0	0	0	0	0	0	0	0	0	0	0	0	0	0	0	0	0	0	0	0	0	0	0
L-Leucine 4	0	0	0	0	0	0	0	0	0	0	0	0	0	0	0	0	0	0	0	0	0	0	0	0	0	0	0	0	0	0	0	0	0
L-Leucine 5	0	0	0	0	0	0	0	0	0	0	0	0	0	0	0	0	0	0	0	0	0	0	0	0	0	0	0	0	0	0	0	0	0
L-Leucine 6	0	0	0	0	0	0	0	0	0	0	0	0	0	0	0	0	0	0	0	0	0	0	0	0	0	0	0	0	0	0	0	0	0
Metabolite: L-LYSINE	Formula: C6H14N2O2	Mass: 146.1055
-----------------------------------------------------------------------------
Group: 1
L-Lysine C6H14N2O2	blank1r	blank2r	blank3r	blank4	blank5	blank6	pooled_1	pooled_10	pooled_11	pooled_2	pooled_3	pooled_4	pooled_5	pooled_6	pooled_7	pooled_8	pooled_9	JK05	JK06	JK13	JK14	JK07	JK08	JK15	JK16	JK01	JK02	JK09	JK10	JK03	JK04	JK11	JK12
L-Lysine 0	1.32719e+06	175412	179042	144572	174265	184441	5.0941e+06	4.84459e+06	4.63289e+06	4.86481e+06	4.91309e+06	4.92058e+06	4.71541e+06	4.87707e+06	4.89162e+06	4.76552e+06	4.75536e+06	1.24021e+07	1.82198e+07	2.22151e+07	1.1013e+07	1.0592e+07	1.22814e+07	1.90819e+07	1.37526e+07	1.45671e+07	1.10582e+07	8.92991e+06	1.08968e+07	1.08451e+07	1.30824e+07	1.03351e+07	8.99115e+06
L-Lysine 1	0	0	0	0	0	0	188673	233798	198445	184714	210258	198309	206058	239978	200773	190361	233370	725439	1.05994e+06	1.21192e+06	610614	610624	680178	1.1058e+06	808025	807648	594571	465884	597760	633920	697152	550574	474800
L-Lysine 2	0	0	0	0	0	0	0	0	0	0	0	0	0	0	0	0	0	0	0	0	0	0	0	0	0	0	0	0	0	0	0	0	0
L-Lysine 3	0	0	0	0	0	0	0	0	0	0	0	0	0	0	0	0	0	0	0	0	0	0	0	0	0	0	0	0	0	0	0	0	0
L-Lysine 4	0	0	0	0	0	0	0	0	0	0	0	0	0	0	0	0	0	0	0	0	0	0	0	0	0	0	0	0	0	0	0	0	0
L-Lysine 5	0	0	0	0	0	0	0	0	0	0	0	0	0	0	0	0	0	0	0	0	0	0	0	0	0	0	0	0	0	0	0	0	0
L-Lysine 6	0	0	0	0	0	0	0	0	0	0	0	0	0	0	0	0	0	0	0	0	0	0	0	0	0	0	0	0	0	0	0	0	0
Metabolite: L-METHIONINE	Formula: C5H11NO2S	Mass: 149.051
-----------------------------------------------------------------------------
Group: 1
L-Methionine C5H11NO2S	blank1r	blank2r	blank3r	blank4	blank5	blank6	pooled_1	pooled_10	pooled_11	pooled_2	pooled_3	pooled_4	pooled_5	pooled_6	pooled_7	pooled_8	pooled_9	JK05	JK06	JK13	JK14	JK07	JK08	JK15	JK16	JK01	JK02	JK09	JK10	JK03	JK04	JK11	JK12
L-Methionine 0	0	0	0	0	0	0	1.03514e+07	1.06432e+07	1.02266e+07	1.05348e+07	1.00817e+07	1.03018e+07	1.0057e+07	1.05069e+07	1.05321e+07	1.0034e+07	9.94781e+06	2.24199e+07	2.46864e+07	3.23848e+07	1.9808e+07	2.00186e+07	2.16497e+07	2.80111e+07	2.39802e+07	2.96868e+07	2.80042e+07	3.35241e+07	3.20006e+07	2.2045e+07	2.84963e+07	2.92697e+07	3.07444e+07
L-Methionine 1	0	0	0	0	0	0	345239	349960	436613	340492	310368	303736	252404	359623	293664	305661	281032	803092	1.06467e+06	1.3881e+06	842668	872577	802914	1.22316e+06	1.08119e+06	1.32556e+06	1.25587e+06	1.4457e+06	1.43972e+06	812593	1.11256e+06	1.10106e+06	1.17285e+06
L-Methionine 2	0	0	0	0	0	0	0	0	0	0	0	0	0	0	0	0	0	0	0	0	0	0	0	0	0	0	0	0	0	0	0	0	0
L-Methionine 3	0	0	0	0	0	0	0	0	0	0	0	0	0	0	0	0	0	0	0	0	0	0	0	0	0	0	0	0	0	0	0	0	0
L-Methionine 4	0	0	0	0	0	0	0	0	0	0	0	0	0	0	0	0	0	0	0	0	0	0	0	0	0	0	0	0	0	0	0	0	0
L-Methionine 5	0	0	0	0	0	0	0	0	0	0	0	0	0	0	0	0	0	0	0	0	0	0	0	0	0	0	0	0	0	0	0	0	0
Metabolite: L-METHIONINE S-OXIDE	Formula: C5H11NO3S	Mass: 165.046
-----------------------------------------------------------------------------
Group: 1
L-Methionine S-oxide C5H11NO3S	blank1r	blank2r	blank3r	blank4	blank5	blank6	pooled_1	pooled_10	pooled_11	pooled_2	pooled_3	pooled_4	pooled_5	pooled_6	pooled_7	pooled_8	pooled_9	JK05	JK06	JK13	JK14	JK07	JK08	JK15	JK16	JK01	JK02	JK09	JK10	JK03	JK04	JK11	JK12
L-Methionine S-oxide 0	0	0	0	0	0	0	58332.3	58134.1	63974.4	62320.5	77391.2	47732.3	66973	84702.5	69081	42335.6	48751	196875	286044	445367	296944	299669	342918	413510	379433	196079	163070	103646	316583	149560	184746	232843	174585
L-Methionine S-oxide 1	0	0	0	0	0	0	0	0	0	0	0	0	0	0	0	0	0	0	0	0	0	0	0	0	0	0	0	0	0	0	0	0	0
L-Methionine S-oxide 2	0	0	0	0	0	0	0	0	0	0	0	0	0	0	0	0	0	0	0	0	0	0	0	0	0	0	0	0	0	0	0	0	0
L-Methionine S-oxide 3	0	0	0	0	0	0	0	0	0	0	0	0	0	0	0	0	0	0	0	0	0	0	0	0	0	0	0	0	0	0	0	0	0
L-Methionine S-oxide 4	0	0	0	0	0	0	0	0	0	0	0	0	0	0	0	0	0	0	0	0	0	0	0	0	0	0	0	0	0	0	0	0	0
L-Methionine S-oxide 5	0	0	0	0	0	0	0	0	0	0	0	0	0	0	0	0	0	0	0	0	0	0	0	0	0	0	0	0	0	0	0	0	0
Metabolite: L-ORNITHINE	Formula: C5H12N2O2	Mass: 132.0899
-----------------------------------------------------------------------------
Group: 1
L-Ornithine C5H12N2O2	blank1r	blank2r	blank3r	blank4	blank5	blank6	pooled_1	pooled_10	pooled_11	pooled_2	pooled_3	pooled_4	pooled_5	pooled_6	pooled_7	pooled_8	pooled_9	JK05	JK06	JK13	JK14	JK07	JK08	JK15	JK16	JK01	JK02	JK09	JK10	JK03	JK04	JK11	JK12
L-Ornithine 0	1.51426e+06	700999	787315	664450	615719	560952	7.79178e+06	8.05795e+06	8.07805e+06	7.34404e+06	7.6419e+06	7.61243e+06	7.44424e+06	7.5427e+06	7.58292e+06	7.79623e+06	8.18851e+06	3.55212e+07	2.00999e+07	3.09974e+07	2.38532e+07	1.88506e+07	2.63193e+07	2.32423e+07	2.29173e+07	1.87763e+07	2.05716e+07	1.74161e+07	2.28975e+07	2.36114e+07	2.34565e+07	2.37061e+07	2.03077e+07
L-Ornithine 1	0	0	0	0	0	0	282726	304212	298062	250352	321478	260693	241417	227112	280595	252021	268950	1.89567e+06	984062	1.5777e+06	1.14366e+06	893512	1.29572e+06	1.10736e+06	1.08779e+06	879329	1.01158e+06	815046	1.19736e+06	1.17958e+06	1.21396e+06	1.2077e+06	967925
L-Ornithine 2	0	0	0	0	0	0	0	0	0	0	0	0	0	13038.8	0	0	0	13900.6	0	0	0	0	0	0	0	0	0	0	0	0	0	0	0
L-Ornithine 3	0	0	0	0	0	0	0	0	0	0	0	0	0	0	0	0	0	0	0	0	0	0	0	0	0	0	0	0	0	0	0	0	0
L-Ornithine 4	0	0	0	0	0	0	0	0	0	0	0	0	0	0	0	0	0	0	0	0	0	0	0	0	0	0	0	0	0	0	0	0	0
L-Ornithine 5	0	0	0	0	0	0	0	0	0	0	0	0	0	0	0	0	0	0	0	0	0	0	0	0	0	0	0	0	0	0	0	0	0
Group: 2
L-Ornithine C5H12N2O2	blank1r	blank2r	blank3r	blank4	blank5	blank6	pooled_1	pooled_10	pooled_11	pooled_2	pooled_3	pooled_4	pooled_5	pooled_6	pooled_7	pooled_8	pooled_9	JK05	JK06	JK13	JK14	JK07	JK08	JK15	JK16	JK01	JK02	JK09	JK10	JK03	JK04	JK11	JK12
L-Ornithine 0	764914	789364	903285	646325	785830	644830	3.5597e+06	3.66586e+06	3.45761e+06	3.48953e+06	3.4145e+06	3.47827e+06	3.56657e+06	3.53275e+06	3.53336e+06	3.54758e+06	3.53094e+06	1.49255e+07	8.75843e+06	1.34309e+07	1.07385e+07	1.04492e+07	1.223e+07	9.63268e+06	1.14994e+07	6.17683e+06	6.6225e+06	6.53351e+06	7.55669e+06	1.03316e+07	1.07224e+07	1.01739e+07	9.64354e+06
L-Ornithine 1	0	0	0	0	0	0	35018.9	57416.1	40013.6	48463.7	29700.8	47628.1	32271.5	58754.9	44550.2	66250.7	62633.9	550213	304054	556317	359606	408509	504651	337094	423054	152937	175925	154838	218451	353122	363877	336721	326684
L-Ornithine 2	0	0	0	0	0	0	0	0	0	0	0	10011.2	0	0	0	0	0	0	0	0	0	0	0	0	0	0	0	0	0	0	0	0	0
L-Ornithine 3	0	0	0	0	0	0	0	0	0	0	0	0	0	0	0	0	0	0	0	0	0	0	0	0	0	0	0	0	0	0	0	0	0
L-Ornithine 4	0	0	0	0	0	0	0	0	0	0	0	0	0	0	0	0	0	0	0	0	0	0	0	0	0	0	0	0	0	0	0	0	0
L-Ornithine 5	0	0	0	0	0	0	0	0	0	0	0	0	0	0	0	0	0	0	0	0	0	0	0	0	0	0	0	0	0	0	0	0	0
Metabolite: L-PHENYLALANINE	Formula: C9H11NO2	Mass: 165.079
-----------------------------------------------------------------------------
Group: 1
L-Phenylalanine C9H11NO2	blank1r	blank2r	blank3r	blank4	blank5	blank6	pooled_1	pooled_10	pooled_11	pooled_2	pooled_3	pooled_4	pooled_5	pooled_6	pooled_7	pooled_8	pooled_9	JK05	JK06	JK13	JK14	JK07	JK08	JK15	JK16	JK01	JK02	JK09	JK10	JK03	JK04	JK11	JK12
L-Phenylalanine 0	0	0	0	31548.8	0	0	1.4956e+07	1.51244e+07	1.54651e+07	1.45347e+07	1.51683e+07	1.48754e+07	1.48146e+07	1.45238e+07	1.47945e+07	1.48389e+07	1.51843e+07	3.83992e+07	4.26471e+07	5.87467e+07	3.54234e+07	3.34925e+07	3.89831e+07	4.94993e+07	3.72377e+07	4.37418e+07	4.81117e+07	4.94446e+07	4.73422e+07	2.94921e+07	4.04719e+07	3.83201e+07	3.74788e+07
L-Phenylalanine 1	0	0	0	0	0	0	1.35888e+06	1.29682e+06	1.26113e+06	1.23598e+06	1.27057e+06	1.30814e+06	1.34206e+06	1.22639e+06	1.28126e+06	1.28444e+06	1.2499e+06	3.68759e+06	4.13773e+06	5.35e+06	3.26456e+06	3.15952e+06	3.62032e+06	4.54897e+06	3.60134e+06	4.12062e+06	4.60224e+06	4.59093e+06	4.38624e+06	2.76199e+06	3.72204e+06	3.69411e+06	3.4893e+06
L-Phenylalanine 2	0	0	0	0	0	0	0	0	0	0	0	0	0	0	0	0	0	44155.1	27028.7	44792.4	29252.4	41178.9	0	47565.9	0	39786.8	39353.2	88330.7	0	0	0	40162.3	58453.5
L-Phenylalanine 3	0	0	0	0	0	0	0	0	0	0	0	0	0	0	0	0	0	0	0	0	0	0	0	0	0	0	0	0	0	0	0	0	0
L-Phenylalanine 4	0	0	0	0	0	0	0	0	0	0	0	0	0	0	0	0	0	0	0	0	0	0	0	0	0	0	0	0	0	0	0	0	0
L-Phenylalanine 5	0	0	0	0	0	0	0	0	0	0	0	0	0	0	0	0	0	0	0	0	0	0	0	0	0	0	0	0	0	0	0	0	0
L-Phenylalanine 6	0	0	0	0	0	0	0	0	0	0	0	0	0	0	0	0	0	0	0	0	0	0	0	0	0	0	0	0	0	0	0	0	0
L-Phenylalanine 7	0	0	0	0	0	0	0	0	0	0	0	0	0	0	0	0	0	0	0	0	0	0	0	0	0	0	0	0	0	0	0	0	0
L-Phenylalanine 8	0	41063.1	49513.6	0	23264.2	19337.7	36720	26373	70513.3	21886.6	18828.2	52602.2	23191.1	37272.5	54468.2	0	0	18167.8	17595.4	28982.1	16131.7	0	0	0	0	32787.1	43389.4	22157.5	0	19381.6	25443.4	19450.6	0
L-Phenylalanine 9	0	0	0	0	0	0	0	0	0	0	0	0	0	0	0	0	0	0	0	0	0	0	0	0	0	0	0	0	0	0	0	0	0
Metabolite: L-PROLINE	Formula: C5H9NO2	Mass: 115.0633
-----------------------------------------------------------------------------
Group: 1
L-Proline C5H9NO2	blank1r	blank2r	blank3r	blank4	blank5	blank6	pooled_1	pooled_10	pooled_11	pooled_2	pooled_3	pooled_4	pooled_5	pooled_6	pooled_7	pooled_8	pooled_9	JK05	JK06	JK13	JK14	JK07	JK08	JK15	JK16	JK01	JK02	JK09	JK10	JK03	JK04	JK11	JK12
L-Proline 0	0	214624	0	3.52748e+06	3.2705e+06	3.03265e+06	8.60475e+07	9.84257e+07	1.00964e+08	8.8426e+07	85691572	8.70058e+07	8.76904e+07	8.77943e+07	8.70256e+07	9.34421e+07	9.63778e+07	402073879	2.31568e+08	415528875	3.33805e+08	2.99109e+08	357803590	3.27316e+08	3.63972e+08	1.94016e+08	2.2519e+08	2.93465e+08	3.40004e+08	2.68064e+08	3.22444e+08	4.02142e+08	3.79866e+08
L-Proline 1	0	0	0	99003.6	76439.4	71883.4	4.78101e+06	5.18957e+06	5.4763e+06	4.69122e+06	4.6203e+06	4.64363e+06	4.77769e+06	4.88909e+06	4.67338e+06	5.18128e+06	5.10871e+06	2.18055e+07	1.2612e+07	2.27682e+07	1.81395e+07	1.63407e+07	1.94688e+07	1.77318e+07	1.97663e+07	1.0424e+07	1.22892e+07	1.60225e+07	1.87527e+07	1.47845e+07	1.77077e+07	2.20969e+07	2.08557e+07
L-Proline 2	0	0	0	0	0	0	41248.6	27841.5	28047.3	50031.8	45396.2	0	55018.2	49339.9	0	48893.6	44101.2	312177	152077	341598	295163	274662	344765	242029	285380	110191	204982	228683	281718	235059	280509	360400	333895
L-Proline 3	0	0	0	0	0	0	0	0	0	0	0	0	0	0	0	0	0	0	0	0	0	0	0	0	0	0	0	0	0	0	0	0	0
L-Proline 4	0	0	0	0	0	0	0	0	0	0	0	0	0	0	0	0	0	0	0	0	0	0	0	0	0	0	0	0	0	0	0	0	0
L-Proline 5	0	0	0	0	0	0	0	0	0	0	0	0	0	0	0	0	0	0	0	0	0	0	0	0	0	0	0	0	0	0	0	0	0
Metabolite: L-SERINE	Formula: C3H7NO3	Mass: 105.0426
-----------------------------------------------------------------------------
Group: 1
L-Serine C3H7NO3	blank1r	blank2r	blank3r	blank4	blank5	blank6	pooled_1	pooled_10	pooled_11	pooled_2	pooled_3	pooled_4	pooled_5	pooled_6	pooled_7	pooled_8	pooled_9	JK05	JK06	JK13	JK14	JK07	JK08	JK15	JK16	JK01	JK02	JK09	JK10	JK03	JK04	JK11	JK12
L-Serine 0	798656	446921	897147	790102	832339	861878	1.16039e+08	7.72619e+07	9.49461e+07	1.02442e+08	1.06912e+08	1.04184e+08	1.06047e+08	1.03352e+08	1.07611e+08	8.50823e+07	9.01898e+07	3.33769e+08	1.71227e+08	2.28347e+08	2.19707e+08	1.86266e+08	2.88048e+08	2.30581e+08	2.31689e+08	1.88105e+08	2.68077e+08	2.57341e+08	2.95737e+08	2.52037e+08	2.68222e+08	2.55284e+08	2.46314e+08
L-Serine 1	0	0	0	0	0	0	3.87655e+06	2.49525e+06	3.15993e+06	3.35363e+06	3.55881e+06	3.41268e+06	3.46606e+06	3.37524e+06	3.61492e+06	2.7558e+06	2.87665e+06	1.07689e+07	5.62771e+06	7.50779e+06	7.243e+06	5.99909e+06	9.05294e+06	7.63058e+06	7.58189e+06	6.33601e+06	8.79199e+06	8.65553e+06	9.63057e+06	8.64754e+06	8.64749e+06	8.24254e+06	7.9972e+06
L-Serine 2	0	0	0	0	0	0	0	0	0	0	0	0	0	0	0	0	0	0	0	0	0	0	0	0	0	0	0	0	0	0	0	0	0
L-Serine 3	0	0	0	0	0	0	0	0	0	0	0	0	0	0	0	0	0	0	0	0	0	0	0	0	0	0	0	0	0	0	0	0	0
Metabolite: L-THIAZOLIDINE-4-CARBOXYLATE	Formula: C4H7NO2S	Mass: 133.0197
-----------------------------------------------------------------------------
Group: 1
L-thiazolidine-4-carboxylate C4H7NO2S	blank1r	blank2r	blank3r	blank4	blank5	blank6	pooled_1	pooled_10	pooled_11	pooled_2	pooled_3	pooled_4	pooled_5	pooled_6	pooled_7	pooled_8	pooled_9	JK05	JK06	JK13	JK14	JK07	JK08	JK15	JK16	JK01	JK02	JK09	JK10	JK03	JK04	JK11	JK12
L-thiazolidine-4-carboxylate 0	0	0	0	0	0	0	177754	244755	221925	173084	175183	101901	160195	155304	150814	178764	263036	1.95088e+06	1.27473e+06	2.4795e+06	1.45987e+06	918949	1.5298e+06	2.16776e+06	1.87627e+06	745013	753865	1.49684e+06	1.87977e+06	856155	655797	1.46871e+06	1.08218e+06
L-thiazolidine-4-carboxylate 1	0	0	0	0	0	0	0	0	0	0	0	0	0	0	0	0	0	0	0	0	0	0	0	66613.1	0	0	0	0	0	0	0	0	0
L-thiazolidine-4-carboxylate 2	0	0	0	0	0	0	0	0	0	0	0	0	0	0	0	0	0	0	0	0	0	0	0	0	0	0	0	0	0	0	0	0	0
L-thiazolidine-4-carboxylate 3	0	0	0	0	0	0	0	0	0	0	0	0	0	0	0	0	0	0	0	0	0	0	0	0	0	0	0	0	0	0	0	0	0
L-thiazolidine-4-carboxylate 4	0	0	0	0	0	0	0	0	0	0	0	0	0	0	0	0	0	0	0	0	0	0	0	0	0	0	0	0	0	0	0	0	0
Metabolite: L-THREONINE	Formula: C4H9NO3	Mass: 119.0582
-----------------------------------------------------------------------------
Group: 1
L-Threonine C4H9NO3	blank1r	blank2r	blank3r	blank4	blank5	blank6	pooled_1	pooled_10	pooled_11	pooled_2	pooled_3	pooled_4	pooled_5	pooled_6	pooled_7	pooled_8	pooled_9	JK05	JK06	JK13	JK14	JK07	JK08	JK15	JK16	JK01	JK02	JK09	JK10	JK03	JK04	JK11	JK12
L-Threonine 0	776856	225364	620187	734951	778914	720680	2.30756e+08	2.46664e+08	2.3442e+08	2.37137e+08	2.33512e+08	2.38371e+08	2.38218e+08	2.4031e+08	1.96025e+08	2.47389e+08	2.50598e+08	6.09514e+08	3.42054e+08	4.47743e+08	4.4977e+08	4.69845e+08	5.05605e+08	4.30342e+08	456186098	3.89765e+08	6.15238e+08	5.41078e+08	4.92012e+08	4.45546e+08	4.34471e+08	4.63202e+08	4.24608e+08
L-Threonine 1	0	0	0	0	0	0	9.88997e+06	1.09787e+07	1.02882e+07	1.02737e+07	1.03773e+07	1.02769e+07	1.00353e+07	1.01948e+07	8.41375e+06	1.06684e+07	1.08766e+07	2.67589e+07	1.44877e+07	1.89089e+07	1.99245e+07	2.07107e+07	2.24043e+07	1.8779e+07	2.05732e+07	1.66281e+07	2.66639e+07	2.39596e+07	2.16646e+07	1.92144e+07	1.83375e+07	2.07156e+07	1.81188e+07
L-Threonine 2	0	0	0	0	0	0	120390	105519	136078	108738	138180	112931	126890	143801	64575.8	114781	171047	85517.4	0	0	186654	515228	474993	298389	495648	95711.3	348415	183918	100387	159005	195047	253309	152488
L-Threonine 3	0	0	0	0	0	0	0	0	0	0	0	0	0	0	0	0	0	0	0	0	0	0	0	0	0	0	0	0	0	0	0	0	0
L-Threonine 4	0	0	0	0	0	0	0	0	0	0	0	0	0	0	0	0	0	0	0	0	0	0	0	0	0	0	0	0	0	0	0	0	0
Group: 2
L-Threonine C4H9NO3	blank1r	blank2r	blank3r	blank4	blank5	blank6	pooled_1	pooled_10	pooled_11	pooled_2	pooled_3	pooled_4	pooled_5	pooled_6	pooled_7	pooled_8	pooled_9	JK05	JK06	JK13	JK14	JK07	JK08	JK15	JK16	JK01	JK02	JK09	JK10	JK03	JK04	JK11	JK12
L-Threonine 0	626889	84448.3	245006	270716	348524	295493	341118	997806	1.05499e+06	394414	402961	394128	370114	422904	340171	872961	1.01431e+06	1.34344e+06	820980	1.07757e+06	1.17153e+06	1.35678e+06	628551	905711	1.33698e+06	1.18311e+06	1.01592e+06	984851	1.50298e+06	1.10606e+06	969486	1.34632e+06	1.01152e+06
L-Threonine 1	0	0	0	0	0	0	0	0	0	0	0	0	0	0	0	0	0	0	0	0	0	0	0	0	0	0	0	0	0	0	0	0	0
L-Threonine 2	0	0	0	0	0	0	0	0	0	0	0	0	0	0	0	0	0	0	0	0	0	0	0	0	0	0	0	0	0	0	0	0	0
L-Threonine 3	0	0	0	0	0	0	0	0	0	0	0	0	0	0	0	0	0	0	0	0	0	0	0	0	0	0	0	0	0	0	0	0	0
L-Threonine 4	0	0	0	0	0	0	0	0	0	0	0	0	0	0	0	0	0	0	0	0	0	0	0	0	0	0	0	0	0	0	0	0	0
Group: 3
L-Threonine C4H9NO3	blank1r	blank2r	blank3r	blank4	blank5	blank6	pooled_1	pooled_10	pooled_11	pooled_2	pooled_3	pooled_4	pooled_5	pooled_6	pooled_7	pooled_8	pooled_9	JK05	JK06	JK13	JK14	JK07	JK08	JK15	JK16	JK01	JK02	JK09	JK10	JK03	JK04	JK11	JK12
L-Threonine 0	306964	79308.2	247063	496530	360888	345292	4.49418e+06	4.44479e+06	6.55882e+06	3.62498e+06	3.77369e+06	4.08756e+06	4.02248e+06	3.78569e+06	3.96088e+06	3.78119e+06	4.61092e+06	1.85699e+07	1.16514e+07	1.99521e+07	1.34389e+07	1.23071e+07	1.45802e+07	1.33508e+07	1.25368e+07	1.25316e+07	1.16774e+07	1.53143e+07	1.95764e+07	1.48561e+07	1.65634e+07	1.87342e+07	1.83771e+07
L-Threonine 1	0	0	0	0	0	0	50128.6	0	0	0	17750	26918.6	0	0	0	0	0	364057	170724	437904	205556	95883.3	280808	159606	109156	135473	180071	173900	321298	150511	283453	357846	436234
L-Threonine 2	0	0	0	0	0	0	0	0	0	0	0	0	0	0	0	0	0	0	0	0	0	0	0	0	0	0	0	0	0	0	0	0	0
L-Threonine 3	0	0	0	0	0	0	0	0	0	0	0	0	0	0	0	0	0	0	0	0	0	0	0	0	0	0	0	0	0	0	0	0	0
L-Threonine 4	0	0	0	0	0	0	0	0	0	0	0	0	0	0	0	0	0	0	0	0	0	0	0	0	0	0	0	0	0	0	0	0	0
Group: 4
L-Threonine C4H9NO3	blank1r	blank2r	blank3r	blank4	blank5	blank6	pooled_1	pooled_10	pooled_11	pooled_2	pooled_3	pooled_4	pooled_5	pooled_6	pooled_7	pooled_8	pooled_9	JK05	JK06	JK13	JK14	JK07	JK08	JK15	JK16	JK01	JK02	JK09	JK10	JK03	JK04	JK11	JK12
L-Threonine 0	400251	0	312905	613190	523947	469776	7.34723e+06	8.7947e+06	1.10556e+07	7.19253e+06	6.90746e+06	7.35484e+06	7.48991e+06	7.35544e+06	7.19642e+06	7.70824e+06	8.74037e+06	3.51817e+07	1.85553e+07	3.18183e+07	2.34869e+07	2.21584e+07	2.58329e+07	2.29466e+07	2.35196e+07	2.11341e+07	2.39754e+07	2.96516e+07	3.44326e+07	2.59268e+07	2.8314e+07	3.27024e+07	2.98387e+07
L-Threonine 1	0	0	0	0	0	0	102720	55435.4	163742	57821.1	65588.8	96763	40887	53043.7	62901.6	83297.9	70189.6	1.07837e+06	152235	698193	485617	367872	668295	409667	506119	272573	631846	605188	976836	541247	581439	972256	764742
L-Threonine 2	0	0	0	0	0	0	0	0	0	0	0	0	0	0	0	0	0	0	0	0	0	0	0	0	0	0	0	0	0	0	0	0	0
L-Threonine 3	0	0	0	0	0	0	0	0	0	0	0	0	0	0	0	0	0	0	0	0	0	0	0	0	0	0	0	0	0	0	0	0	0
L-Threonine 4	0	0	0	0	0	0	0	0	0	0	0	0	0	0	0	0	0	0	0	0	0	0	0	0	0	0	0	0	0	0	0	0	0
Group: 5
L-Threonine C4H9NO3	blank1r	blank2r	blank3r	blank4	blank5	blank6	pooled_1	pooled_10	pooled_11	pooled_2	pooled_3	pooled_4	pooled_5	pooled_6	pooled_7	pooled_8	pooled_9	JK05	JK06	JK13	JK14	JK07	JK08	JK15	JK16	JK01	JK02	JK09	JK10	JK03	JK04	JK11	JK12
L-Threonine 0	292145	119167	0	0	177075	155033	447994	1.51069e+06	1.60965e+06	575844	514015	573397	606193	688616	0	1.16125e+06	1.48448e+06	5.45049e+06	2.46875e+06	5.36074e+06	3.96792e+06	2.85457e+06	2.70121e+06	2.92484e+06	3.2897e+06	2.97904e+06	1.89707e+06	2.50007e+06	4.46587e+06	4148965	3.37702e+06	5.00253e+06	3.70597e+06
L-Threonine 1	0	0	0	0	0	0	0	0	12167.1	0	0	0	0	0	0	0	14974.7	131216	19805.6	150361	88964.5	41713.5	36282.9	49576.4	45541.3	27041.1	15687.8	28047.2	88126.1	72240.2	51095.5	103609	49298.9
L-Threonine 2	0	0	0	0	0	0	0	0	0	0	0	0	0	0	0	0	0	0	0	0	0	0	0	0	0	0	0	0	0	0	0	0	0
L-Threonine 3	0	0	0	0	0	0	0	0	0	0	0	0	0	0	0	0	0	0	0	0	0	0	0	0	0	0	0	0	0	0	0	0	0
L-Threonine 4	0	0	0	0	0	0	0	0	0	0	0	0	0	0	0	0	0	0	0	0	0	0	0	0	0	0	0	0	0	0	0	0	0
Metabolite: L-TRYPTOPHAN	Formula: C11H12N2O2	Mass: 204.0899
-----------------------------------------------------------------------------
Group: 1
L-Tryptophan C11H12N2O2	blank1r	blank2r	blank3r	blank4	blank5	blank6	pooled_1	pooled_10	pooled_11	pooled_2	pooled_3	pooled_4	pooled_5	pooled_6	pooled_7	pooled_8	pooled_9	JK05	JK06	JK13	JK14	JK07	JK08	JK15	JK16	JK01	JK02	JK09	JK10	JK03	JK04	JK11	JK12
L-Tryptophan 0	0	0	0	0	0	0	1.71595e+06	1.6075e+06	1.58468e+06	1.72442e+06	1.73018e+06	1.70544e+06	1.78462e+06	1.69713e+06	1.7116e+06	1.71577e+06	1.62098e+06	5.96875e+06	7.526e+06	9.56409e+06	4.86905e+06	5.66016e+06	6.14081e+06	8.32004e+06	6.13891e+06	4.56295e+06	4.53173e+06	4.35206e+06	4.8239e+06	4.61886e+06	5.37372e+06	5.25742e+06	4.55932e+06
L-Tryptophan 1	0	0	0	0	0	0	93493.5	137648	101668	114819	94420.8	120901	98787.7	145466	145669	133628	69977.8	588057	790345	1.12269e+06	492230	576755	602048	914954	657124	448446	497370	472904	487507	404246	564414	552531	428920
L-Tryptophan 2	0	0	0	0	0	0	0	0	0	0	0	0	0	0	0	0	0	0	0	0	0	0	0	0	0	0	0	0	0	0	0	0	0
L-Tryptophan 3	0	0	0	0	0	0	0	0	0	0	0	0	0	0	0	0	0	0	0	0	0	0	0	0	0	0	0	0	0	0	0	0	0
L-Tryptophan 4	0	0	0	0	0	0	0	0	0	0	0	0	0	0	0	0	0	0	0	0	0	0	0	0	0	0	0	0	0	0	0	0	0
L-Tryptophan 5	0	0	0	0	0	0	0	0	0	0	0	0	0	0	0	0	0	0	0	0	0	0	0	0	0	0	0	0	0	0	0	0	0
L-Tryptophan 6	0	0	0	0	0	0	0	0	0	0	0	0	0	0	0	0	0	0	0	0	0	0	0	0	0	0	0	0	0	0	0	0	0
L-Tryptophan 7	0	0	0	0	0	0	0	0	0	0	0	0	0	0	0	0	0	0	0	0	0	0	0	0	0	0	0	0	0	0	0	0	0
L-Tryptophan 8	0	0	0	0	0	0	0	0	0	0	0	0	0	0	0	0	0	0	0	0	0	0	0	0	0	0	0	0	23854	0	15566.4	0	0
L-Tryptophan 9	0	0	0	0	0	0	0	0	0	0	0	0	0	0	0	0	0	0	0	0	0	0	0	0	0	0	0	0	0	0	0	0	0
L-Tryptophan 10	0	0	0	0	0	0	0	0	0	0	0	0	0	0	0	0	0	0	0	0	0	0	0	0	0	0	0	0	0	0	0	0	0
L-Tryptophan 11	0	0	0	0	0	0	0	0	0	0	0	0	0	0	0	0	0	0	0	0	0	0	0	0	0	0	0	0	0	0	0	0	0
Metabolite: L-TYROSINE	Formula: C9H11NO3	Mass: 181.0739
-----------------------------------------------------------------------------
Group: 1
L-Tyrosine C9H11NO3	blank1r	blank2r	blank3r	blank4	blank5	blank6	pooled_1	pooled_10	pooled_11	pooled_2	pooled_3	pooled_4	pooled_5	pooled_6	pooled_7	pooled_8	pooled_9	JK05	JK06	JK13	JK14	JK07	JK08	JK15	JK16	JK01	JK02	JK09	JK10	JK03	JK04	JK11	JK12
L-Tyrosine 0	0	0	0	90635.1	104859	99736.6	6.95901e+06	7.02325e+06	6.30291e+06	6.99876e+06	6.90885e+06	6.86559e+06	6.78087e+06	6.79176e+06	6.70652e+06	6.97436e+06	6.82083e+06	2.52632e+07	3.17859e+07	3.71929e+07	1.81296e+07	2.36197e+07	2.60549e+07	3.23709e+07	2.58967e+07	1.97911e+07	1.84389e+07	1.86791e+07	1.92242e+07	1.58171e+07	1.90331e+07	1.76742e+07	1.67029e+07
L-Tyrosine 1	0	0	0	0	0	0	400416	480105	387506	403546	339803	374322	408583	393049	436566	404315	433872	2.04549e+06	2.67253e+06	3.08522e+06	1.47881e+06	1.94836e+06	2.21096e+06	2.7072e+06	2.15504e+06	1.55732e+06	1.49911e+06	1.48298e+06	1.46623e+06	1.25795e+06	1.62134e+06	1.41493e+06	1.24365e+06
L-Tyrosine 2	0	0	0	0	0	0	0	0	0	0	0	0	0	0	0	0	0	0	0	0	0	0	0	0	26460.6	0	0	0	0	0	0	0	0
L-Tyrosine 3	0	0	0	0	0	0	0	0	0	0	0	0	0	0	0	0	0	0	0	0	0	0	0	0	0	0	0	0	0	0	0	0	0
L-Tyrosine 4	0	0	0	0	0	0	0	0	0	0	0	0	0	0	0	0	0	0	0	0	0	0	0	0	0	0	0	0	0	0	0	0	0
L-Tyrosine 5	0	0	0	0	0	0	0	0	0	0	0	0	0	0	0	0	0	0	0	0	0	0	0	0	0	0	0	0	0	0	0	0	0
L-Tyrosine 6	0	0	0	0	0	0	0	0	0	0	0	0	0	0	0	0	0	0	0	0	0	0	0	0	0	0	0	0	0	0	0	0	0
L-Tyrosine 7	0	0	0	0	0	0	0	0	0	0	0	0	0	0	0	0	0	0	0	0	0	0	0	0	0	0	0	0	0	0	0	0	0
L-Tyrosine 8	0	0	30350.1	53358.1	31620.8	45510.9	61901.8	61166.7	60191	35531.4	68359.4	59615.3	54253.9	71593.8	82298.7	65449.2	57403.2	76152.2	84478.8	76979.2	89913.7	80965.8	93216.1	74830.4	118611	82775.5	60766	73666.4	60802.8	74649.4	100065	105885	124670
L-Tyrosine 9	0	0	0	0	0	0	0	0	0	0	0	0	0	0	0	0	0	0	0	0	0	0	0	0	0	0	0	0	0	0	0	0	0
Metabolite: L-VALINE	Formula: C5H11NO2	Mass: 117.079
-----------------------------------------------------------------------------
Group: 1
L-Valine C5H11NO2	blank1r	blank2r	blank3r	blank4	blank5	blank6	pooled_1	pooled_10	pooled_11	pooled_2	pooled_3	pooled_4	pooled_5	pooled_6	pooled_7	pooled_8	pooled_9	JK05	JK06	JK13	JK14	JK07	JK08	JK15	JK16	JK01	JK02	JK09	JK10	JK03	JK04	JK11	JK12
L-Valine 0	0	139118	63273.8	589615	544131	428677	1.69647e+07	2.07611e+07	2.23817e+07	1.69385e+07	1.71024e+07	1.68131e+07	1.7245e+07	1.73053e+07	1.76483e+07	1.89577e+07	1.95018e+07	5.04872e+07	5.33867e+07	7.15667e+07	3.66187e+07	4.55334e+07	4.41268e+07	5.51146e+07	5.03642e+07	7.22184e+07	7.19907e+07	7.21781e+07	7.95075e+07	4.51575e+07	5.89787e+07	6.63175e+07	6.15971e+07
L-Valine 1	0	0	0	0	0	0	869413	1.07364e+06	1.19165e+06	868947	748474	906432	800985	900186	891859	982211	986214	2.75631e+06	2.87195e+06	3.90066e+06	1.92376e+06	2.43813e+06	2.42962e+06	2.88967e+06	2.71743e+06	3.89249e+06	3.95581e+06	3.78539e+06	4.22165e+06	2.52502e+06	3.13808e+06	3.58846e+06	3.24275e+06
L-Valine 2	0	0	0	0	0	0	0	0	0	0	0	0	0	0	0	0	0	0	0	0	0	0	0	0	0	0	0	0	18669.8	0	0	19801.5	0
L-Valine 3	0	0	0	0	0	0	0	0	0	0	0	0	0	0	0	0	0	0	0	0	0	0	0	0	0	0	0	0	0	0	0	0	0
L-Valine 4	0	0	0	0	0	0	0	0	0	0	0	0	0	0	0	0	0	0	0	0	0	0	0	0	0	0	0	0	0	0	0	0	0
L-Valine 5	0	0	0	0	0	0	0	0	0	0	0	0	0	0	0	0	0	0	0	0	0	0	0	0	0	0	0	0	0	0	0	0	0
Group: 2
L-Valine C5H11NO2	blank1r	blank2r	blank3r	blank4	blank5	blank6	pooled_1	pooled_10	pooled_11	pooled_2	pooled_3	pooled_4	pooled_5	pooled_6	pooled_7	pooled_8	pooled_9	JK05	JK06	JK13	JK14	JK07	JK08	JK15	JK16	JK01	JK02	JK09	JK10	JK03	JK04	JK11	JK12
L-Valine 0	276787	157641	175000	1.02434e+06	784550	663729	1.99134e+06	3.13184e+06	3.5482e+06	2.20313e+06	2.03868e+06	2.20676e+06	2.00021e+06	2.10459e+06	2.8992e+06	3.25287e+06	2.90681e+06	7.88252e+06	5.4366e+06	6.46671e+06	5.78607e+06	5.82018e+06	6.22831e+06	5.46986e+06	5.5152e+06	5.90179e+06	6.32092e+06	6.81937e+06	6.84842e+06	5.72133e+06	6.68064e+06	5.70557e+06	5.26365e+06
L-Valine 1	0	0	0	0	0	0	44366.8	34275.9	58481.9	17894.9	29131	0	37458.8	28224.5	39249	32527.8	24572.8	270280	115529	179163	152455	176803	210848	167382	179433	142189	221923	255357	194136	236429	182544	143361	127180
L-Valine 2	0	0	0	0	0	0	0	0	0	0	0	0	0	0	0	0	0	0	0	0	0	0	0	0	0	0	0	0	0	0	0	0	0
L-Valine 3	0	0	0	0	0	0	0	0	0	0	0	0	0	0	0	0	0	0	0	0	0	0	0	0	0	0	0	0	0	0	0	0	0
L-Valine 4	0	0	0	0	0	0	0	0	0	0	0	0	0	0	0	0	0	0	0	0	0	0	0	0	0	0	0	0	0	0	0	0	0
L-Valine 5	0	0	0	0	0	0	0	0	0	0	0	0	0	0	0	0	0	0	0	0	0	0	0	0	0	0	0	0	0	0	0	0	0
Metabolite: N-ACETYL-D-GLUCOSAMINE	Formula: C8H15NO6	Mass: 221.0899
-----------------------------------------------------------------------------
Group: 1
N-Acetyl-D-glucosamine C8H15NO6	blank1r	blank2r	blank3r	blank4	blank5	blank6	pooled_1	pooled_10	pooled_11	pooled_2	pooled_3	pooled_4	pooled_5	pooled_6	pooled_7	pooled_8	pooled_9	JK05	JK06	JK13	JK14	JK07	JK08	JK15	JK16	JK01	JK02	JK09	JK10	JK03	JK04	JK11	JK12
N-Acetyl-D-glucosamine 0	0	0	0	0	0	0	21252.5	0	0	37745.6	0	0	0	35843.7	0	0	0	392877	295441	609058	461096	73310	149981	78033.6	102426	28302.7	0	40708.8	56710.8	45737.1	64197.6	56316.7	45066.3
N-Acetyl-D-glucosamine 1	0	0	0	0	0	0	0	0	0	0	0	0	0	0	0	0	0	0	0	0	0	0	0	0	0	0	0	0	0	0	0	0	0
N-Acetyl-D-glucosamine 2	0	0	0	0	0	0	0	0	0	0	0	0	0	0	0	0	0	0	0	0	0	0	27393.4	21773.2	0	0	0	0	0	0	0	0	0
N-Acetyl-D-glucosamine 3	0	0	0	0	0	0	0	0	0	0	0	0	0	0	0	0	0	0	0	0	0	0	23214.8	0	0	0	0	0	0	0	0	0	0
N-Acetyl-D-glucosamine 4	0	0	0	0	0	0	0	0	0	0	0	0	0	0	0	0	0	0	0	0	0	0	0	0	0	0	0	0	0	0	0	0	0
N-Acetyl-D-glucosamine 5	0	0	0	0	0	0	0	0	0	0	0	0	0	0	0	0	0	0	0	0	0	0	0	0	0	0	0	0	0	0	0	0	0
N-Acetyl-D-glucosamine 6	0	0	0	0	0	0	0	0	0	0	0	0	0	0	0	0	0	0	0	0	0	0	21721.8	76110.4	91564.6	0	0	0	0	0	0	0	0
N-Acetyl-D-glucosamine 7	0	0	0	0	0	0	0	0	0	0	0	0	0	0	0	0	0	0	0	0	0	0	0	0	0	0	0	0	0	0	0	0	0
N-Acetyl-D-glucosamine 8	0	0	0	0	0	0	0	0	0	0	0	0	0	0	0	0	0	0	0	0	0	0	0	25157.8	0	0	0	0	0	0	0	0	0
Group: 2
N-Acetyl-D-glucosamine C8H15NO6	blank1r	blank2r	blank3r	blank4	blank5	blank6	pooled_1	pooled_10	pooled_11	pooled_2	pooled_3	pooled_4	pooled_5	pooled_6	pooled_7	pooled_8	pooled_9	JK05	JK06	JK13	JK14	JK07	JK08	JK15	JK16	JK01	JK02	JK09	JK10	JK03	JK04	JK11	JK12
N-Acetyl-D-glucosamine 0	0	0	0	0	0	0	0	0	0	0	0	0	28202	0	0	0	0	296518	182496	298216	255470	0	45042.3	60899	45945.8	0	0	0	0	0	0	0	32208
N-Acetyl-D-glucosamine 1	0	0	0	0	0	0	0	0	0	0	0	0	0	0	0	0	0	0	0	0	0	0	0	0	0	0	0	0	0	0	0	0	0
N-Acetyl-D-glucosamine 2	0	0	0	0	0	0	0	0	0	0	0	0	0	0	0	0	0	0	0	0	0	0	22089.7	0	0	0	0	0	0	0	0	0	0
N-Acetyl-D-glucosamine 3	0	0	0	0	0	0	0	0	0	0	0	0	0	0	0	0	0	0	0	0	0	0	0	0	0	0	0	0	0	0	0	0	0
N-Acetyl-D-glucosamine 4	0	0	0	0	0	0	0	0	0	0	0	0	0	0	0	0	0	0	0	0	0	0	0	0	0	0	0	0	0	0	0	0	0
N-Acetyl-D-glucosamine 5	0	0	0	0	0	0	0	0	0	0	0	0	0	0	0	0	0	0	0	0	0	0	0	0	0	0	0	0	0	0	0	0	0
N-Acetyl-D-glucosamine 6	0	0	0	0	0	0	0	0	0	0	0	0	0	0	0	0	0	0	0	0	0	18529.7	0	0	49276.2	0	0	0	0	0	0	0	0
N-Acetyl-D-glucosamine 7	0	0	0	0	0	0	0	0	0	0	0	0	0	0	0	0	0	0	0	0	0	0	0	0	0	0	0	0	0	0	0	0	0
N-Acetyl-D-glucosamine 8	0	0	0	0	0	0	0	0	0	0	0	0	0	0	0	0	0	0	0	0	0	0	0	0	0	0	0	0	0	0	0	0	0
Metabolite: N-ACETYL-DL-METHIONINE	Formula: C6H9NO4S	Mass: 191.0252
-----------------------------------------------------------------------------
Group: 1
N-Acetyl-DL-methionine C6H9NO4S	blank1r	blank2r	blank3r	blank4	blank5	blank6	pooled_1	pooled_10	pooled_11	pooled_2	pooled_3	pooled_4	pooled_5	pooled_6	pooled_7	pooled_8	pooled_9	JK05	JK06	JK13	JK14	JK07	JK08	JK15	JK16	JK01	JK02	JK09	JK10	JK03	JK04	JK11	JK12
N-Acetyl-DL-methionine 0	0	0	0	0	0	0	3.22825e+07	1.9185e+07	2.08232e+07	2.73826e+07	2.77061e+07	2.76693e+07	2.79338e+07	2.80729e+07	2.58591e+07	1.95146e+07	2.12013e+07	9.4252e+07	2.4673e+08	2.39745e+08	6.80421e+07	8.81308e+07	1.06057e+08	1.67832e+08	1.02482e+08	1.19723e+08	5.65029e+07	4.79594e+07	7.53752e+07	6.20362e+07	1.00599e+08	7.25521e+07	6.75041e+07
N-Acetyl-DL-methionine 1	0	0	0	0	0	0	1.27648e+06	1.07061e+06	1.18452e+06	1.32089e+06	1.326e+06	1.49251e+06	1.64911e+06	1.64074e+06	1.51498e+06	1.08342e+06	1.19697e+06	5.88659e+06	1.546e+07	1.50543e+07	4.39948e+06	5.45797e+06	6.68545e+06	1.02492e+07	6.06099e+06	7.79578e+06	3.28281e+06	2.66007e+06	4.47862e+06	3.57254e+06	5.95003e+06	4.4044e+06	4.15028e+06
N-Acetyl-DL-methionine 2	0	0	0	0	0	0	0	0	0	0	0	0	0	0	0	0	0	0	0	0	0	77288.9	0	0	0	0	0	0	0	0	0	0	0
N-Acetyl-DL-methionine 3	0	0	0	0	0	0	1.19375e+06	616546	746995	927123	1.02812e+06	996446	1.00152e+06	1.01095e+06	961107	732722	798628	0	0	0	0	1.16288e+07	1.66417e+07	1.91349e+07	1.26286e+07	0	0	0	0	4.77227e+06	8.16229e+06	5.39707e+06	5.89212e+06
N-Acetyl-DL-methionine 4	0	0	0	0	0	0	0	0	0	0	0	0	0	0	0	0	0	0	0	0	0	126864	306850	245634	166954	0	0	0	0	0	0	0	0
N-Acetyl-DL-methionine 5	0	0	0	0	0	0	0	0	0	0	0	0	0	0	0	0	0	0	0	0	0	0	0	0	0	0	0	0	0	0	0	0	0
N-Acetyl-DL-methionine 6	0	0	0	0	0	0	0	0	0	0	0	0	0	0	0	0	0	0	0	0	0	0	0	0	0	0	0	0	0	0	0	0	0
Group: 2
N-Acetyl-DL-methionine C6H9NO4S	blank1r	blank2r	blank3r	blank4	blank5	blank6	pooled_1	pooled_10	pooled_11	pooled_2	pooled_3	pooled_4	pooled_5	pooled_6	pooled_7	pooled_8	pooled_9	JK05	JK06	JK13	JK14	JK07	JK08	JK15	JK16	JK01	JK02	JK09	JK10	JK03	JK04	JK11	JK12
N-Acetyl-DL-methionine 0	0	0	0	0	0	0	0	40781	0	0	0	25286.7	0	43676.1	0	0	40551	451543	373104	419958	310712	111269	129782	175370	114170	390745	513090	664784	692845	505845	461775	621767	575679
N-Acetyl-DL-methionine 1	0	0	0	0	0	0	0	0	0	0	0	0	0	0	0	0	0	0	0	0	0	0	0	0	0	0	0	0	0	0	0	0	0
N-Acetyl-DL-methionine 2	0	0	0	0	0	0	0	0	0	0	0	0	0	0	0	0	0	0	0	0	0	0	0	0	0	0	0	0	0	0	0	0	0
N-Acetyl-DL-methionine 3	0	0	0	0	0	0	0	0	0	0	0	0	0	0	0	0	0	0	0	0	0	46757	55006.7	31929.6	36870.9	0	0	0	0	0	61490.7	40222.1	56074.9
N-Acetyl-DL-methionine 4	0	0	0	0	0	0	0	0	0	0	0	0	0	0	0	0	0	0	0	0	0	0	0	0	0	0	0	0	0	0	0	0	0
N-Acetyl-DL-methionine 5	0	0	0	0	0	0	0	0	0	0	0	0	0	0	0	0	0	0	0	0	0	0	0	0	0	0	0	0	0	0	0	0	0
N-Acetyl-DL-methionine 6	0	0	0	0	0	0	0	0	0	0	0	0	0	0	0	0	0	0	0	0	0	0	0	0	0	0	0	0	0	0	0	0	0
Metabolite: N-ACETYL-L-GLUTAMATE 5-SEMIALDEHYDE	Formula: C7H11NO4	Mass: 173.0688
-----------------------------------------------------------------------------
Group: 1
N-Acetyl-L-glutamate 5-semialdehyde C7H11NO4	blank1r	blank2r	blank3r	blank4	blank5	blank6	pooled_1	pooled_10	pooled_11	pooled_2	pooled_3	pooled_4	pooled_5	pooled_6	pooled_7	pooled_8	pooled_9	JK05	JK06	JK13	JK14	JK07	JK08	JK15	JK16	JK01	JK02	JK09	JK10	JK03	JK04	JK11	JK12
N-Acetyl-L-glutamate 5-semialdehyde 0	187580	46822	78223.5	157036	72585.2	99305.2	9.56741e+06	1.32321e+07	1.36211e+07	9.16831e+06	9.97559e+06	1.00173e+07	9.79037e+06	1.13145e+07	1.02192e+07	1.11275e+07	1.14787e+07	7.52401e+07	9.56245e+07	919771	746263	7.96014e+07	7.62575e+07	1.17366e+06	1.12384e+06	6.76348e+07	6.61611e+07	1.39084e+06	661226	5.9846e+07	6.95851e+07	1.31188e+06	569493
N-Acetyl-L-glutamate 5-semialdehyde 1	0	0	0	0	0	0	188758	400705	453811	205734	210837	254572	231562	255659	212555	213958	231182	5.35909e+06	6.96173e+06	0	0	5.7079e+06	5.43907e+06	0	0	5.00424e+06	4.91741e+06	0	0	4.11673e+06	4.9181e+06	0	0
N-Acetyl-L-glutamate 5-semialdehyde 2	0	0	0	0	0	0	0	0	0	0	0	0	0	0	0	0	0	0	0	0	0	0	0	0	0	0	0	0	0	0	0	0	0
N-Acetyl-L-glutamate 5-semialdehyde 3	0	0	0	0	0	0	0	0	0	0	0	0	0	0	0	0	0	0	0	0	0	0	0	0	0	0	0	0	0	0	0	0	0
N-Acetyl-L-glutamate 5-semialdehyde 4	0	0	0	0	0	0	0	0	0	0	0	0	0	0	0	0	0	0	0	0	0	0	0	0	0	0	0	0	0	0	0	0	0
N-Acetyl-L-glutamate 5-semialdehyde 5	0	57507.3	84211.3	65731.6	67116.4	31325.6	0	0	0	0	0	0	0	0	0	0	42070.9	0	0	0	0	0	0	0	0	0	0	0	0	0	0	0	0
N-Acetyl-L-glutamate 5-semialdehyde 6	0	0	0	0	0	0	0	0	0	0	0	0	0	0	0	0	0	0	0	0	0	0	0	0	0	0	0	0	0	0	0	0	0
N-Acetyl-L-glutamate 5-semialdehyde 7	0	0	0	0	0	0	0	0	0	0	0	0	0	0	0	0	0	0	0	0	0	0	0	0	0	0	0	0	0	0	0	0	0
Metabolite: N-ACETYL-L-HISTIDINE	Formula: C8H11N3O3	Mass: 197.08
-----------------------------------------------------------------------------
Group: 1
N-Acetyl-L-histidine C8H11N3O3	blank1r	blank2r	blank3r	blank4	blank5	blank6	pooled_1	pooled_10	pooled_11	pooled_2	pooled_3	pooled_4	pooled_5	pooled_6	pooled_7	pooled_8	pooled_9	JK05	JK06	JK13	JK14	JK07	JK08	JK15	JK16	JK01	JK02	JK09	JK10	JK03	JK04	JK11	JK12
N-Acetyl-L-histidine 0	0	0	0	0	0	0	94891.6	29403	56060.6	55252	45745	76028.7	0	60480.9	64230	41475.1	43524.9	310525	693285	858349	255717	414959	448126	739257	311047	293453	162570	293844	332391	247849	319016	315654	221545
N-Acetyl-L-histidine 1	0	0	0	0	0	0	0	0	0	0	0	0	0	0	0	0	0	0	0	0	0	0	0	0	0	0	0	0	0	0	0	0	0
N-Acetyl-L-histidine 2	0	0	0	0	0	0	0	0	0	0	0	0	0	0	0	0	0	0	0	0	0	0	0	0	0	0	0	0	0	0	0	0	0
N-Acetyl-L-histidine 3	0	0	0	0	0	0	0	0	0	0	0	0	0	0	0	0	0	0	0	0	0	0	0	0	0	0	0	0	0	0	0	0	0
N-Acetyl-L-histidine 4	0	0	0	0	0	0	0	0	0	0	0	0	0	0	0	0	0	0	0	0	0	0	0	0	0	0	0	0	0	0	0	0	0
N-Acetyl-L-histidine 5	0	0	0	0	0	0	0	0	0	0	0	0	0	0	0	0	0	0	0	0	0	0	0	0	0	0	0	0	0	0	0	0	0
N-Acetyl-L-histidine 6	0	0	0	0	0	0	0	0	0	0	0	0	0	0	0	0	0	0	0	0	0	0	0	0	0	0	0	0	0	0	0	0	0
N-Acetyl-L-histidine 7	0	0	0	0	0	0	0	0	0	0	0	0	0	0	0	0	0	0	0	0	0	0	0	0	0	0	0	0	0	0	0	0	0
N-Acetyl-L-histidine 8	0	0	0	0	0	0	0	0	0	0	0	0	0	0	0	0	0	0	0	0	0	0	0	0	0	0	0	0	0	0	0	0	0
Metabolite: N-ACETYLGLUTAMINE	Formula: C7H12N2O4	Mass: 188.0797
-----------------------------------------------------------------------------
Group: 1
N-Acetylglutamine C7H12N2O4	blank1r	blank2r	blank3r	blank4	blank5	blank6	pooled_1	pooled_10	pooled_11	pooled_2	pooled_3	pooled_4	pooled_5	pooled_6	pooled_7	pooled_8	pooled_9	JK05	JK06	JK13	JK14	JK07	JK08	JK15	JK16	JK01	JK02	JK09	JK10	JK03	JK04	JK11	JK12
N-Acetylglutamine 0	0	0	0	0	0	0	335017	358591	336839	387315	459250	428456	445278	460368	405428	352829	365302	1.25007e+06	418482	905170	1.15714e+06	449223	916801	369554	632581	1.0093e+06	1.81815e+06	2.0618e+06	2.08005e+06	1.72225e+06	1.55833e+06	1.72916e+06	1.83859e+06
N-Acetylglutamine 1	0	0	0	0	0	0	0	0	0	0	0	0	0	0	0	0	0	0	0	0	0	0	0	0	0	0	0	0	0	0	0	0	44804.7
N-Acetylglutamine 2	0	0	0	0	0	0	0	0	0	0	0	0	0	0	0	0	0	0	0	0	0	0	0	0	0	0	0	0	0	0	0	0	0
N-Acetylglutamine 3	0	0	0	0	0	0	0	0	0	0	0	0	0	0	0	0	0	0	0	0	0	0	0	0	0	0	0	0	0	0	0	0	0
N-Acetylglutamine 4	0	0	0	0	0	0	0	0	0	0	0	0	0	0	0	0	0	0	0	0	0	0	0	0	0	0	0	0	0	0	0	0	0
N-Acetylglutamine 5	0	0	0	0	0	0	0	0	0	0	0	0	0	0	0	0	0	0	0	0	0	0	0	0	0	0	0	0	0	0	0	0	0
N-Acetylglutamine 6	0	0	0	0	0	0	0	0	0	0	0	0	0	0	0	0	0	0	0	0	0	0	0	0	0	0	0	0	0	0	0	0	0
N-Acetylglutamine 7	0	0	0	0	0	0	0	0	0	0	0	0	0	0	0	0	0	0	0	0	0	0	0	0	0	0	0	0	0	0	0	0	0
Metabolite: N-FORMYL-L-METHIONINE	Formula: C6H11NO3S	Mass: 177.046
-----------------------------------------------------------------------------
Group: 1
N-Formyl-L-methionine C6H11NO3S	blank1r	blank2r	blank3r	blank4	blank5	blank6	pooled_1	pooled_10	pooled_11	pooled_2	pooled_3	pooled_4	pooled_5	pooled_6	pooled_7	pooled_8	pooled_9	JK05	JK06	JK13	JK14	JK07	JK08	JK15	JK16	JK01	JK02	JK09	JK10	JK03	JK04	JK11	JK12
N-Formyl-L-methionine 0	0	0	0	0	0	0	0	0	0	980682	819518	0	639184	0	789593	761787	932072	3.39305e+06	1.9693e+06	3.2048e+06	3.22955e+06	2.83764e+06	3.78008e+06	3.3829e+06	1.83233e+06	0	1.15187e+06	1.9118e+06	2.92699e+06	3.22303e+06	3.57978e+06	4.49368e+06	3.81349e+06
N-Formyl-L-methionine 1	0	0	0	0	0	0	0	0	0	0	0	0	0	0	0	0	0	0	0	0	0	0	0	0	0	0	0	0	0	0	202607	0	0
N-Formyl-L-methionine 2	0	0	0	0	0	0	0	0	0	0	0	0	0	0	0	0	0	0	0	0	0	0	0	0	0	0	0	0	0	0	0	0	0
N-Formyl-L-methionine 3	0	0	0	0	0	0	0	0	0	0	0	0	0	0	0	0	0	0	0	0	0	0	0	0	0	0	0	0	0	0	0	0	0
N-Formyl-L-methionine 4	0	0	0	0	0	0	0	0	0	0	0	0	0	0	0	0	0	0	0	0	0	0	0	0	0	0	0	0	0	0	0	0	0
N-Formyl-L-methionine 5	0	0	0	0	0	0	0	0	0	0	0	0	0	0	0	0	0	0	0	0	0	0	0	0	0	0	0	0	0	0	0	0	0
N-Formyl-L-methionine 6	0	0	0	0	0	0	0	0	0	0	0	0	0	0	0	0	0	0	0	0	0	0	0	0	0	0	0	0	0	0	0	0	0
Metabolite: N-HYDROXYVALINE	Formula: C5H11NO3	Mass: 133.0739
-----------------------------------------------------------------------------
Group: 1
N-hydroxyvaline C5H11NO3	blank1r	blank2r	blank3r	blank4	blank5	blank6	pooled_1	pooled_10	pooled_11	pooled_2	pooled_3	pooled_4	pooled_5	pooled_6	pooled_7	pooled_8	pooled_9	JK05	JK06	JK13	JK14	JK07	JK08	JK15	JK16	JK01	JK02	JK09	JK10	JK03	JK04	JK11	JK12
N-hydroxyvaline 0	0	0	0	0	0	0	269305	201291	197570	221042	224143	234454	241363	147836	155431	266665	226669	1.03335e+06	566107	795667	718121	587502	598381	556970	573882	563510	1.07385e+06	855850	1.01692e+06	540412	463174	497116	613457
N-hydroxyvaline 1	0	0	0	0	0	0	0	0	0	0	0	0	0	0	0	0	0	0	0	0	0	0	0	0	0	0	0	0	0	0	0	0	0
N-hydroxyvaline 2	0	0	0	0	0	0	0	0	0	0	0	0	0	0	0	0	0	0	0	0	0	0	0	0	0	0	0	0	0	0	0	0	0
N-hydroxyvaline 3	0	0	0	0	0	0	0	0	0	0	0	0	0	0	0	0	0	0	0	0	0	0	0	0	0	0	0	0	0	0	0	0	0
N-hydroxyvaline 4	0	0	0	0	0	0	0	0	0	0	0	0	0	0	0	0	0	0	0	0	0	0	0	0	0	0	0	0	0	0	0	0	0
N-hydroxyvaline 5	0	0	0	0	0	0	0	0	0	0	0	0	0	0	0	0	0	0	0	0	0	0	0	0	0	0	0	0	0	0	0	0	0
Metabolite: N-METHYLETHANOLAMINE PHOSPHATE	Formula: C3H10NO4P	Mass: 155.0347
-----------------------------------------------------------------------------
Group: 1
N-Methylethanolamine phosphate C3H10NO4P	blank1r	blank2r	blank3r	blank4	blank5	blank6	pooled_1	pooled_10	pooled_11	pooled_2	pooled_3	pooled_4	pooled_5	pooled_6	pooled_7	pooled_8	pooled_9	JK05	JK06	JK13	JK14	JK07	JK08	JK15	JK16	JK01	JK02	JK09	JK10	JK03	JK04	JK11	JK12
N-Methylethanolamine phosphate 0	0	0	0	0	0	0	644721	457295	510653	582765	518517	442435	541316	521553	581905	479320	513144	1.92299e+06	1.68349e+06	2.28308e+06	1.9975e+06	1.60576e+06	1.62067e+06	1.58104e+06	1.96506e+06	3.61649e+06	2.28951e+06	5.12225e+06	4.53865e+06	2.6849e+06	4.28051e+06	3.43106e+06	3.40362e+06
N-Methylethanolamine phosphate 1	0	0	0	0	0	0	0	0	0	0	0	0	0	0	0	0	0	0	0	0	0	0	0	0	0	0	0	0	0	0	0	0	0
N-Methylethanolamine phosphate 2	0	0	0	0	0	0	0	0	0	0	0	0	0	0	0	0	0	0	0	0	0	0	0	0	0	0	0	0	0	0	0	0	0
N-Methylethanolamine phosphate 3	0	0	0	0	0	0	0	0	0	0	0	0	0	0	0	0	0	0	0	0	0	0	0	0	0	0	0	0	0	0	0	0	0
Group: 2
N-Methylethanolamine phosphate C3H10NO4P	blank1r	blank2r	blank3r	blank4	blank5	blank6	pooled_1	pooled_10	pooled_11	pooled_2	pooled_3	pooled_4	pooled_5	pooled_6	pooled_7	pooled_8	pooled_9	JK05	JK06	JK13	JK14	JK07	JK08	JK15	JK16	JK01	JK02	JK09	JK10	JK03	JK04	JK11	JK12
N-Methylethanolamine phosphate 0	0	0	0	0	0	0	628015	433850	497512	571390	518517	442435	541316	521553	560863	472014	475284	1.89155e+06	1.63971e+06	2.24119e+06	1.97778e+06	1.56974e+06	1.62067e+06	1.55191e+06	1.92122e+06	3.54729e+06	2.22009e+06	4.68565e+06	4.28203e+06	2.64154e+06	4.16215e+06	3.28089e+06	3.27073e+06
N-Methylethanolamine phosphate 1	0	0	0	0	0	0	0	0	0	0	0	0	0	0	0	0	0	0	0	0	0	0	0	0	0	0	0	0	0	0	0	0	0
N-Methylethanolamine phosphate 2	0	0	0	0	0	0	0	0	0	0	0	0	0	0	0	0	0	0	0	0	0	0	0	0	0	0	0	0	0	0	0	0	0
N-Methylethanolamine phosphate 3	0	0	0	0	0	0	0	0	0	0	0	0	0	0	0	0	0	0	0	0	0	0	0	0	0	0	0	0	0	0	0	0	0
Metabolite: N-UNDECANOYLGLYCINE	Formula: C13H25NO3	Mass: 243.1834
-----------------------------------------------------------------------------
Group: 1
N-Undecanoylglycine C13H25NO3	blank1r	blank2r	blank3r	blank4	blank5	blank6	pooled_1	pooled_10	pooled_11	pooled_2	pooled_3	pooled_4	pooled_5	pooled_6	pooled_7	pooled_8	pooled_9	JK05	JK06	JK13	JK14	JK07	JK08	JK15	JK16	JK01	JK02	JK09	JK10	JK03	JK04	JK11	JK12
N-Undecanoylglycine 0	0	0	0	0	0	0	9.10001e+06	9.15823e+06	9.17176e+06	9.16571e+06	9.09097e+06	9.05737e+06	9.407e+06	9.18245e+06	9.28157e+06	9.04916e+06	9.35895e+06	1.15152e+07	1.00038e+07	9.44487e+06	8.38515e+06	1.39128e+07	3.66361e+07	3.14571e+07	7.54226e+06	1.69295e+07	2.7833e+07	3.84053e+07	3.02125e+07	2.06334e+07	2.7321e+07	1.85078e+07	1.67051e+07
N-Undecanoylglycine 1	0	0	0	0	0	0	1.00334e+06	1.0551e+06	1.12432e+06	1.13216e+06	943686	1.09961e+06	1.10831e+06	1.08502e+06	1.21782e+06	978084	942944	1.33352e+06	1.12818e+06	896763	766039	1.77447e+06	5.09334e+06	4.39802e+06	782979	2.05586e+06	3.57338e+06	5.31286e+06	3.94703e+06	2.62708e+06	3.71209e+06	2.2683e+06	1.95737e+06
N-Undecanoylglycine 2	0	0	0	0	0	0	0	0	0	0	0	0	0	0	0	0	0	0	0	0	0	0	0	0	0	0	0	0	0	0	0	0	0
N-Undecanoylglycine 3	0	0	0	0	0	0	0	0	0	0	0	0	0	0	0	0	0	0	0	0	0	0	0	0	0	0	0	0	0	0	0	0	0
N-Undecanoylglycine 4	0	0	0	0	0	0	0	0	0	0	0	0	0	0	0	0	0	0	0	0	0	0	0	0	0	0	0	0	0	0	0	0	0
N-Undecanoylglycine 5	0	0	0	0	0	0	0	0	0	0	0	0	0	0	0	0	0	0	0	0	0	0	0	0	0	0	0	0	0	0	0	0	0
N-Undecanoylglycine 6	0	0	0	0	0	0	0	0	0	0	0	0	0	0	0	0	0	0	0	0	0	0	0	0	0	0	0	0	0	0	0	0	0
N-Undecanoylglycine 7	0	0	0	0	0	0	0	0	0	0	0	0	0	0	0	0	0	0	0	0	0	0	0	0	0	0	0	0	0	0	0	0	0
N-Undecanoylglycine 8	0	0	0	0	0	0	0	0	0	0	0	0	0	0	0	0	0	0	0	0	0	0	0	0	0	0	0	0	0	0	0	0	0
N-Undecanoylglycine 9	0	0	0	0	0	0	0	0	0	0	0	0	0	0	0	0	0	0	0	0	0	0	0	0	0	0	0	0	0	0	0	0	0
N-Undecanoylglycine 10	0	0	0	0	0	0	0	0	0	0	0	0	0	0	0	0	0	0	0	0	0	0	0	0	0	0	0	0	0	0	0	0	0
N-Undecanoylglycine 11	0	0	0	0	0	0	0	0	0	0	0	0	0	0	0	0	0	0	0	0	0	0	0	0	0	0	0	0	0	0	0	0	0
N-Undecanoylglycine 12	0	0	0	0	0	0	0	0	0	0	0	0	0	0	0	0	0	0	0	0	0	0	0	0	0	0	0	0	0	0	0	0	0
N-Undecanoylglycine 13	0	0	0	0	0	0	0	0	0	0	0	0	0	0	0	0	0	0	0	0	0	0	0	0	0	0	0	0	0	0	0	0	0
Metabolite: N4-(ACETYL-BETA-D-GLUCOSAMINYL)ASPARAGINE	Formula: C12H21N3O8	Mass: 335.1329
-----------------------------------------------------------------------------
Group: 1
N4-(Acetyl-beta-D-glucosaminyl)asparagine C12H21N3O8	blank1r	blank2r	blank3r	blank4	blank5	blank6	pooled_1	pooled_10	pooled_11	pooled_2	pooled_3	pooled_4	pooled_5	pooled_6	pooled_7	pooled_8	pooled_9	JK05	JK06	JK13	JK14	JK07	JK08	JK15	JK16	JK01	JK02	JK09	JK10	JK03	JK04	JK11	JK12
N4-(Acetyl-beta-D-glucosaminyl)asparagine 0	0	0	0	0	0	0	617747	295773	384382	537795	641949	632486	533669	614173	457291	381650	538932	1.16598e+06	1.29786e+06	1.57342e+06	1.08532e+06	1.24921e+06	1.02427e+06	1.49662e+06	877304	1.91362e+06	2.14079e+06	1.59485e+06	2.00335e+06	981526	1.15265e+06	1.16517e+06	1.38117e+06
N4-(Acetyl-beta-D-glucosaminyl)asparagine 1	0	0	0	0	0	0	0	0	0	0	0	0	0	0	0	0	0	0	0	0	0	0	0	0	0	0	143323	0	0	0	0	0	0
N4-(Acetyl-beta-D-glucosaminyl)asparagine 2	0	0	0	0	0	0	0	0	0	0	0	0	0	0	0	0	0	0	0	0	0	0	0	0	0	0	0	0	0	0	0	0	0
N4-(Acetyl-beta-D-glucosaminyl)asparagine 3	0	0	0	0	0	0	0	0	0	0	0	0	0	0	0	0	0	0	0	0	0	0	0	0	0	0	0	0	0	0	0	0	0
N4-(Acetyl-beta-D-glucosaminyl)asparagine 4	0	0	0	0	0	0	0	0	0	0	0	0	0	0	0	0	0	0	0	0	0	0	0	0	0	0	0	0	0	0	0	0	0
N4-(Acetyl-beta-D-glucosaminyl)asparagine 5	0	0	0	0	0	0	0	0	0	0	0	0	0	0	0	0	0	0	0	0	0	0	0	0	0	0	0	0	0	0	0	0	0
N4-(Acetyl-beta-D-glucosaminyl)asparagine 6	0	0	0	0	0	0	0	0	0	0	0	0	0	0	0	0	0	0	0	0	0	0	0	0	75809.4	0	0	0	0	0	0	0	0
N4-(Acetyl-beta-D-glucosaminyl)asparagine 7	0	0	0	0	0	0	0	0	0	0	0	0	0	0	0	0	0	0	0	0	0	0	0	0	0	0	0	0	0	0	0	0	0
N4-(Acetyl-beta-D-glucosaminyl)asparagine 8	0	0	0	0	0	0	0	0	0	0	0	0	0	0	0	0	0	0	0	0	0	0	0	0	0	0	0	0	0	0	0	0	0
N4-(Acetyl-beta-D-glucosaminyl)asparagine 9	0	0	0	0	0	0	0	0	0	0	0	0	0	0	0	0	0	0	0	0	0	0	0	0	0	0	0	0	0	0	0	0	0
N4-(Acetyl-beta-D-glucosaminyl)asparagine 10	0	0	0	0	0	0	0	0	0	0	0	0	0	0	0	0	0	0	0	0	0	0	0	0	0	0	0	0	0	0	0	0	0
N4-(Acetyl-beta-D-glucosaminyl)asparagine 11	0	0	0	0	0	0	0	0	0	0	0	0	0	0	0	0	0	0	0	0	0	0	0	0	0	0	0	0	0	0	0	0	0
N4-(Acetyl-beta-D-glucosaminyl)asparagine 12	0	0	0	0	0	0	0	0	0	0	0	0	0	0	0	0	0	0	0	0	0	0	0	0	0	0	0	0	0	0	0	0	0
Group: 2
N4-(Acetyl-beta-D-glucosaminyl)asparagine C12H21N3O8	blank1r	blank2r	blank3r	blank4	blank5	blank6	pooled_1	pooled_10	pooled_11	pooled_2	pooled_3	pooled_4	pooled_5	pooled_6	pooled_7	pooled_8	pooled_9	JK05	JK06	JK13	JK14	JK07	JK08	JK15	JK16	JK01	JK02	JK09	JK10	JK03	JK04	JK11	JK12
N4-(Acetyl-beta-D-glucosaminyl)asparagine 0	0	0	0	0	0	0	377069	170631	167762	328656	400088	394325	313326	389201	237327	194676	351540	791658	1.26307e+06	1.53969e+06	858153	1.16478e+06	850125	1.44341e+06	805647	883431	641325	234187	357841	167779	177072	203314	119968
N4-(Acetyl-beta-D-glucosaminyl)asparagine 1	0	0	0	0	0	0	0	0	0	0	0	0	0	0	0	0	0	0	0	0	0	0	0	0	0	0	0	0	0	0	0	0	0
N4-(Acetyl-beta-D-glucosaminyl)asparagine 2	0	0	0	0	0	0	0	0	0	0	0	0	0	0	0	0	0	0	0	0	0	0	0	0	0	0	0	0	0	0	0	0	0
N4-(Acetyl-beta-D-glucosaminyl)asparagine 3	0	0	0	0	0	0	0	0	0	0	0	0	0	0	0	0	0	0	0	0	0	0	0	0	0	0	0	0	0	0	0	0	0
N4-(Acetyl-beta-D-glucosaminyl)asparagine 4	0	0	0	0	0	0	0	0	0	0	0	0	0	0	0	0	0	0	0	0	0	0	0	0	0	0	0	0	0	0	0	0	0
N4-(Acetyl-beta-D-glucosaminyl)asparagine 5	0	0	0	0	0	0	0	0	0	0	0	0	0	0	0	0	0	0	0	0	0	0	0	0	0	0	0	0	0	0	0	0	0
N4-(Acetyl-beta-D-glucosaminyl)asparagine 6	0	0	0	0	0	0	0	0	0	0	0	0	0	0	0	0	0	0	0	0	0	0	0	0	75809.4	0	0	0	0	0	0	0	0
N4-(Acetyl-beta-D-glucosaminyl)asparagine 7	0	0	0	0	0	0	0	0	0	0	0	0	0	0	0	0	0	0	0	0	0	0	0	0	0	0	0	0	0	0	0	0	0
N4-(Acetyl-beta-D-glucosaminyl)asparagine 8	0	0	0	0	0	0	0	0	0	0	0	0	0	0	0	0	0	0	0	0	0	0	0	0	0	0	0	0	0	0	0	0	0
N4-(Acetyl-beta-D-glucosaminyl)asparagine 9	0	0	0	0	0	0	0	0	0	0	0	0	0	0	0	0	0	0	0	0	0	0	0	0	0	0	0	0	0	0	0	0	0
N4-(Acetyl-beta-D-glucosaminyl)asparagine 10	0	0	0	0	0	0	0	0	0	0	0	0	0	0	0	0	0	0	0	0	0	0	0	0	0	0	0	0	0	0	0	0	0
N4-(Acetyl-beta-D-glucosaminyl)asparagine 11	0	0	0	0	0	0	0	0	0	0	0	0	0	0	0	0	0	0	0	0	0	0	0	0	0	0	0	0	0	0	0	0	0
[truncated: 498 more rows]
